# Supplementary material for: Transcriptomic and Proteomic Profiles for Elucidating Cisplatin Resistance in Head-and-Neck Squamous Cell Carcinoma
Source: MDPI journal article supplement (doi:10.3390/cancers14225511), 2022-11-09
Supplement: s1 [file s1]

# Supplementary Figure legends

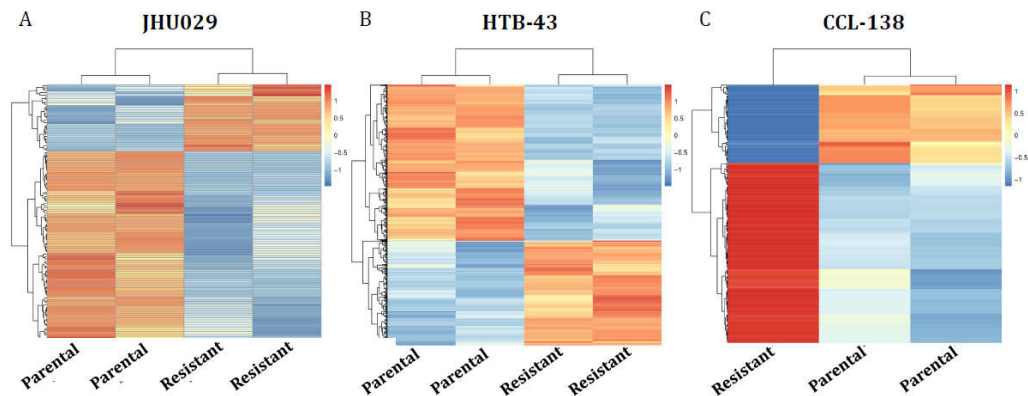

**Supplementary Figure S1.** Heatmap of the RNA-seq data: **(A)** Heatmap of the JHU029 cells. Note the difference between resistant and parental cells; **(B)** Heatmap of HTB-43 cells. Note the difference between resistant and parental cells; **(C)** Heatmap of the CCL-138 cells. Note the difference between resistant and parental.

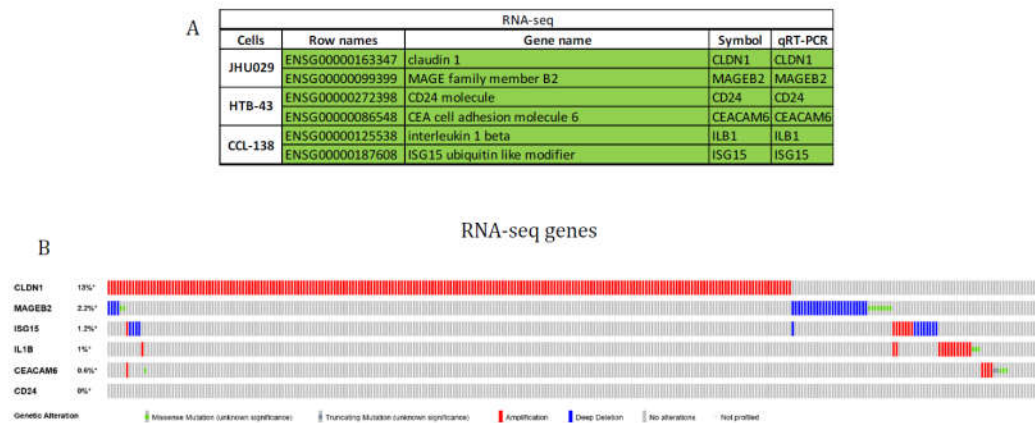

**Supplementary Figure S2.** *In silico* study of gene status: **(A)** Summary of selected genes for qRT-PCR; **(B)** Genomic alteration of the indicated genes according to the Oncoprint dataset.



were commonly found to be upregulated; **(B)** A total of 6 proteins were commonly found to be deregulated.

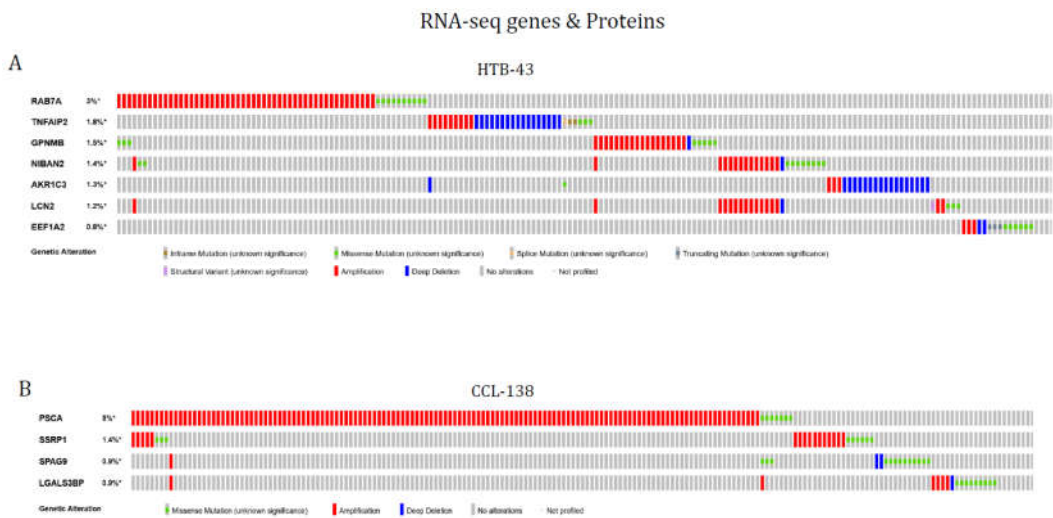

**Supplementary Figure S5.** *In silico* study of gene status: **(A)** Genomic alteration of the indicated genes according to the Oncoprint dataset found to be deregulated in HTB-43 cells; **(B)** Genomic alteration of the indicated genes according to the Oncoprint dataset found to be deregulated in CCL-138 cells.

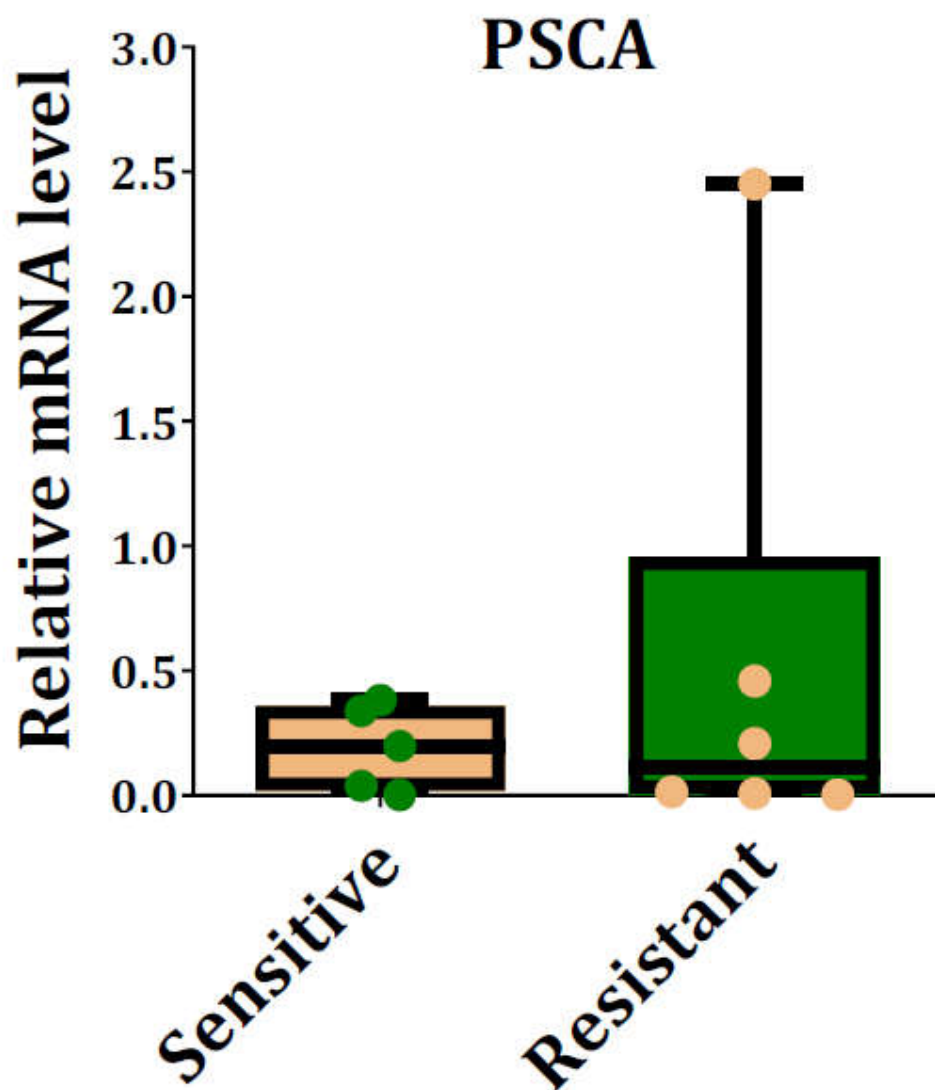

**Supplementary Figure S6.** *PSCA* gene expression shows a trend to significance when resistant *versus* sensitive patients were compared.

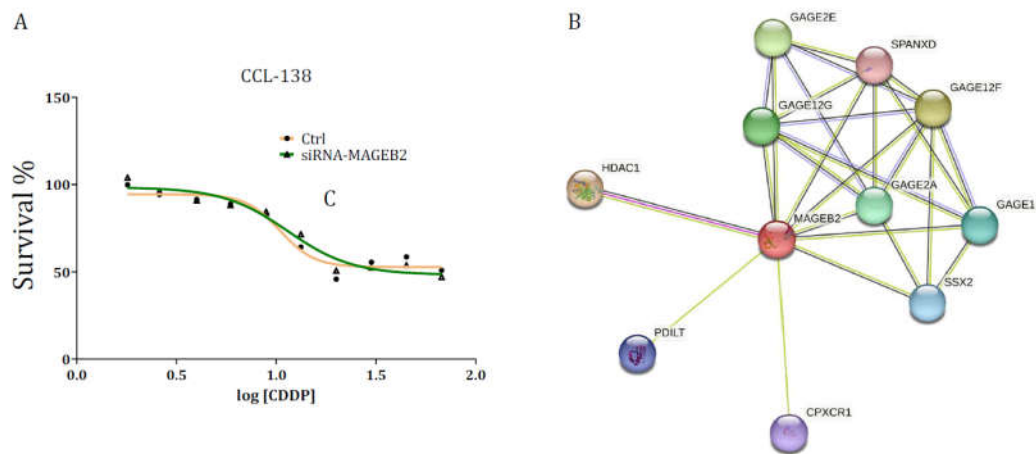

**Supplementary Figure S7.** Characterization of *MAGEB2*: (A) Lack of sensitization in *MAGEB2* depletion conditions in CCL-138; (B) *MAGEB2* protein interactions.

**Table S1.** Patients in whom the RNA study of the 12 selected genes was carried out. Both patients who received chemotherapy and radiotherapy, these treatments were after surgery. QT, chemotherapy; RT, radiotherapy.

| Patient | Surgery | Cancer type | Resistant | QT  | RT  |
|---------|---------|-------------|-----------|-----|-----|
| P2      | YES     | larynx      | YES       | NO  | YES |
| P7      | YES     | larynx      | NO        | YES | YES |
| P8      | YES     | larynx      | NO        | YES | YES |
| P15     | YES     | larynx      | YES       | YES | YES |
| P17     | YES     | larynx      | NO        | NO  | YES |
| P22     | YES     | larynx      | NO        | NO  | YES |
| P29     | YES     | larynx      | NO        | NO  | YES |
| P32     | YES     | larynx      | YES       | NO  | YES |
| P33     | YES     | larynx      | YES       | NO  | YES |
| P42     | YES     | larynx      | YES       | YES | YES |
| P70     | YES     | larynx      | YES       | NO  | YES |

**Table S2.** Data counts before and after some processing steps. The raw data is available in the NCBI SRA database under the following accession numbers and the BioProject accession code PRJNA893841.

| Cell Line                                                   | Replicates | Number of raw reads | Number of reads after trimming | Mapping percent after filtering | Accession number in NCBI SRA database |
|-------------------------------------------------------------|------------|---------------------|--------------------------------|---------------------------------|---------------------------------------|
| HTB-43 (FaDu)                                               | HTB-43P-1  | 23755496            | 9205260                        | 99.97%                          | SRR22028463                           |
| Pharynx primary parental HTB-43 (FaDu)                      | HTB-43P-2  | 23662886            | 9036143                        | 99.96%                          | SRR22028462                           |
| Pharynx primary resistant HTB-43 (FaDu)                     | HTB-43R-1  | 30351858            | 10865117                       | 99.92%                          | SRR22028461                           |
| Pharynx primary resistant HTB-43 (FaDu)                     | HTB-43R-2  | 24438226            | 9050392                        | 99.96%                          | SRR22028460                           |
| CCL-138 (Detroit 562)                                       | CCL-138P-1 | 27025306            | 10198441                       | 99.96%                          | SRR22028467                           |
| Pharynx metastatic parental CCL-138 (Detroit 562)           | CCL-138P-2 | 26819396            | 10136993                       | 99.96%                          | SRR22028466                           |
| Pharynx metastatic parental CCL-138 (Detroit 562)           | CCL-138R-1 | 25446870            | 9258014                        | 99.95%                          | SRR22028464                           |
| Pharynx metastatic resistant JHU029 Larynx primary parental | JHU029P-1  | 32029104            | 9921133                        | 99.96%                          | SRR22028457                           |
| JHU029 Larynx primary parental                              | JHU029P-2  | 25886458            | 12091413                       | 99.95%                          | SRR22028458                           |
| JHU029 Larynx primary resistant                             | JHU029R-1  | 21267200            | 8397834                        | 99.87%                          | SRR22028459                           |
| JHU029 Larynx primary resistant                             | JHU029R-2  | 25049098            | 10108380                       | 99.96%                          | SRR22028465                           |

**Table S3.** Deregulated genes resulting from RNA-seq in the JHU029-R cell line compared to the parental line (JHU029). A total of 85 downregulated genes and 30 upregulated genes were found. Green indicates downregulated genes and orange indicates upregulated genes.

| Sample No. | Gene Code       | Gene name                                                                | Chromosome |
|------------|-----------------|--------------------------------------------------------------------------|------------|
| 22         | ENSG00000135074 | ADAM metalloproteinase domain 19                                         | 5          |
| 27         | ENSG00000122644 | ADP ribosylation factor like GTPase 4A                                   | 7          |
| 64         | ENSG00000184254 | aldehyde dehydrogenase 1 family member A3                                | 15         |
| 13         | ENSG00000187134 | aldo-keto reductase family 1 member C1                                   | 10         |
| 14         | ENSG00000151632 | aldo-keto reductase family 1 member C2                                   | 10         |
| 15         | ENSG00000196139 | aldo-keto reductase family 1 member C3                                   | 10         |
| 65         | ENSG00000109107 | aldolase, fructose-bisphosphate C                                        | 17         |
| 9          | ENSG00000071073 | alpha-1,3-mannosyl-glycoprotein 4-beta-N-acetylglucosaminyltransferase A | 2          |
| 46         | ENSG00000152766 | ankyrin repeat domain 22                                                 | 10         |
| 40         | ENSG00000165272 | aquaporin 3 (Gill blood group)                                           | 9          |
| 29         | ENSG00000106546 | aryl hydrocarbon receptor                                                | 7          |
| 21         | ENSG00000183876 | arylsulfatase family member I                                            | 5          |
| 41         | ENSG00000165029 | ATP binding cassette subfamily A member 1                                | 9          |
| 52         | ENSG00000186318 | beta-secretase 1                                                         | 11         |
| 60         | ENSG00000074410 | carbonic anhydrase 12                                                    | 15         |
| 12         | ENSG00000128510 | carboxypeptidase A4                                                      | 7          |
| 62         | ENSG00000103888 | cell migration inducing hyaluronidase 1                                  | 15         |
| 5          | ENSG00000143320 | cellular retinoic acid binding protein 2                                 | 1          |
| 61         | ENSG00000173546 | chondroitin sulfate proteoglycan 4                                       | 15         |

|    |                 |                                                                      |     |
|----|-----------------|----------------------------------------------------------------------|-----|
| 26 | ENSG00000166446 | chromodomain Y like 2                                                | 16  |
| 21 | ENSG00000235162 | chromosome 12 open reading frame 75                                  | 12  |
| 71 | ENSG00000176659 | chromosome 20 putative open reading frame 197                        | 20  |
| 5  | ENSG00000163347 | claudin 1                                                            | 3   |
| 10 | ENSG00000204262 | collagen type V alpha 2 chain                                        | 2   |
| 18 | ENSG00000182326 | complement C1s                                                       | 12  |
| 16 | ENSG00000107562 | C-X-C motif chemokine ligand 12                                      | 10  |
| 8  | ENSG00000145824 | C-X-C motif chemokine ligand 14                                      | 5   |
| 56 | ENSG00000118971 | cyclin D2                                                            | 12  |
| 32 | ENSG00000173852 | dpy-19 like C-mannosyltransferase 1                                  | 7   |
| 9  | ENSG00000151914 | dystonin                                                             | 6   |
| 14 | ENSG00000182585 | epithelial mitogen                                                   | 4   |
| 69 | ENSG00000161671 | ER membrane protein complex subunit 10                               | 19  |
| 74 | ENSG00000179083 | family with sequence similarity 133 member A                         | X   |
| 48 | ENSG00000149485 | fatty acid desaturase 1                                              | 11  |
| 2  | ENSG00000115414 | fibronectin 1                                                        | 2   |
| 33 | ENSG00000132436 | fidgetin like 1                                                      | 7   |
| 3  | ENSG00000168386 | filamin A interacting protein 1 like                                 | 3   |
| 31 | ENSG00000106080 | FKBP prolyl isomerase 14                                             | 7   |
| 45 | ENSG00000151025 | G protein-coupled receptor 158                                       | 10  |
| 7  | ENSG00000143891 | galactose mutarotase                                                 | 2   |
|    | ENSEMBL         | GENENAME                                                             | CHR |
|    | ENSEMBL         | GENENAME                                                             | CHR |
| 24 | ENSG00000176153 | glutathione peroxidase 2                                             | 14  |
| 30 | ENSG00000136235 | glycoprotein nmb                                                     | 7   |
| 72 | ENSG00000189060 | H1.0 linker histone                                                  | 22  |
| 23 | ENSG00000276410 | H2B clustered histone 3                                              | 6   |
| 25 | ENSG00000274290 | H2B clustered histone 6                                              | 6   |
| 24 | ENSG00000287080 | H3 clustered histone 3                                               | 6   |
| 59 | ENSG00000126803 | heat shock protein family A (Hsp70) member 2                         | 14  |
| 6  | ENSG00000143341 | hemicentin 1                                                         | 1   |
| 13 | ENSG00000170801 | HtrA serine peptidase 3                                              | 4   |
| 39 | ENSG00000170961 | hyaluronan synthase 2                                                | 8   |
| 12 | ENSG00000115457 | insulin like growth factor binding protein 2                         | 2   |
| 58 | ENSG00000167779 | insulin like growth factor binding protein 6                         | 12  |
| 66 | ENSG00000171401 | keratin 13                                                           | 17  |
| 25 | ENSG00000178573 | MAF bZIP transcription factor                                        | 16  |
| 83 | ENSG00000198681 | MAGE family member A1                                                | X   |
| 81 | ENSG00000213401 | MAGE family member A12                                               | X   |
| 80 | ENSG00000221867 | MAGE family member A3                                                | X   |
| 79 | ENSG00000147381 | MAGE family member A4                                                | X   |
| 29 | ENSG00000099399 | MAGE family member B2                                                | X   |
| 73 | ENSG00000179222 | MAGE family member D1                                                | X   |
| 38 | ENSG00000147676 | mal, T cell differentiation protein 2                                | 8   |
| 50 | ENSG00000196611 | matrix metalloproteinase 1                                           | 11  |
| 54 | ENSG00000076706 | melanoma cell adhesion molecule                                      | 11  |
| 78 | ENSG00000076770 | muscleblind like splicing regulator 3                                | X   |
| 53 | ENSG00000149573 | myelin protein zero like 2                                           | 11  |
| 35 | ENSG00000135272 | MyoD family inhibitor domain containing                              | 7   |
| 11 | ENSG00000228509 | NA                                                                   | NA  |
| 67 | ENSG00000279207 | NA                                                                   | NA  |
| 4  | ENSG00000177551 | nescient helix-loop-helix 2                                          | 1   |
| 84 | ENSG00000165246 | neuroligin 4 Y-linked                                                | Y   |
| 20 | ENSG00000112992 | nicotinamide nucleotide transhydrogenase                             | 5   |
| 7  | ENSG00000151014 | nocturnin                                                            | 4   |
| 22 | ENSG00000074590 | NUAK family kinase 1                                                 | 12  |
| 19 | ENSG00000173391 | oxidized low density lipoprotein receptor 1                          | 12  |
| 70 | ENSG00000101417 | peroxisomal membrane protein 4                                       | 20  |
| 2  | ENSG00000162407 | phospholipid phosphatase 3                                           | 1   |
| 4  | ENSG00000188313 | phospholipid scramblase 1                                            | 3   |
| 37 | ENSG00000076641 | phosphoprotein membrane anchor with glycosphingolipid microdomains 1 | 8   |
| 57 | ENSG00000139629 | polypeptide N-acetylgalactosaminyltransferase 6                      | 12  |
| 44 | ENSG00000148344 | prostaglandin E synthase                                             | 9   |



|    |                 |                                                               |    |
|----|-----------------|---------------------------------------------------------------|----|
| 19 | ENSG00000132356 | protein kinase AMP-activated catalytic subunit alpha 1        | 5  |
| 3  | ENSG00000142875 | protein kinase cAMP-activated catalytic subunit beta          | 1  |
| 51 | ENSG00000178202 | protein O-glucosyltransferase 3                               | 11 |
| 49 | ENSG00000123892 | RAB38, member RAS oncogene family                             | 11 |
| 17 | ENSG00000039560 | retinoic acid induced 14                                      | 5  |
| 77 | ENSG00000133135 | ring finger protein 128                                       | X  |
| 23 | ENSG00000278771 | RNA component of signal recognition particle 7SL3             | 14 |
| 1  | ENSG00000143546 | S100 calcium binding protein A8                               | 1  |
| 16 | ENSG00000112902 | semaphorin 5A                                                 | 5  |
| 17 | ENSG00000150687 | serine protease 23                                            | 11 |
| 18 | ENSG00000079215 | solute carrier family 1 member 3                              | 5  |
| 47 | ENSG00000134802 | solute carrier family 43 member 3                             | 11 |
| 6  | ENSG00000151012 | solute carrier family 7 member 11                             | 4  |
| 55 | ENSG00000137642 | sortilin related receptor 1                                   | 11 |
| 34 | ENSG00000157214 | STEAP2 metalloredutase                                        | 7  |
| 15 | ENSG00000145545 | steroid 5 alpha-reductase 1                                   | 5  |
| 63 | ENSG00000182253 | synemin                                                       | 15 |
| 28 | ENSG00000106537 | tetraspanin 13                                                | 7  |
| 75 | ENSG00000000003 | tetraspanin 6                                                 | X  |
| 8  | ENSG00000144115 | threonine synthase like 2                                     | 2  |
| 1  | ENSG00000186891 | TNF receptor superfamily member 18                            | 1  |
| 42 | ENSG00000181634 | TNF superfamily member 15                                     | 9  |
| 43 | ENSG00000136869 | toll like receptor 4                                          | 9  |
| 76 | ENSG00000180964 | transcription elongation factor A like 8                      | X  |
| 26 | ENSG00000106460 | transmembrane protein 106B                                    | 7  |
| 20 | ENSG00000167552 | tubulin alpha 1a                                              | 12 |
| 28 | ENSG00000128294 | tyrosylprotein sulfotransferase 2                             | 22 |
| 68 | ENSG00000179913 | UDP-GlcNAc:betaGal beta-1,3-N-acetylglucosaminyltransferase 3 | 19 |
| 82 | ENSG00000147394 | zinc finger protein 185 with LIM domain                       | X  |
| 27 | ENSG00000197013 | zinc finger protein 429                                       | 19 |
| 36 | ENSG00000164684 | zinc finger protein 704                                       | 8  |
| 10 | ENSG00000214652 | zinc finger protein 727                                       | 7  |
| 11 | ENSG00000234444 | zinc finger protein 736                                       | 7  |

**Table S4.** Deregulated genes resulting from RNA-seq in the HTB-43-R cell line compared to the parental line (HTB-43). A total of 392 downregulated genes and 263 upregulated genes were found. Green indicates downregulated genes and orange indicates upregulated genes.

| Sample No. | Gene Code       | Gene name                                                 | Chromosome |
|------------|-----------------|-----------------------------------------------------------|------------|
| 91         | ENSG00000116133 | 24-dehydrocholesterol reductase                           | 1          |
| 188        | ENSG00000089127 | 2'-5'-oligoadenylate synthetase 1                         | 12         |
| 189        | ENSG00000111335 | 2'-5'-oligoadenylate synthetase 2                         | 12         |
| 297        | ENSG00000135114 | 2'-5'-oligoadenylate synthetase like                      | 12         |
| 194        | ENSG00000112972 | 3-hydroxy-3-methylglutaryl-CoA synthase 1                 | 5          |
| 66         | ENSG00000186603 | 4-hydroxyphenylpyruvate dioxygenase like                  | 1          |
| 29         | ENSG00000123836 | 6-phosphofructo-2-kinase/fructose-2,6-biphosphatase 2     | 1          |
| 21         | ENSG00000143322 | ABL proto-oncogene 2, non-receptor tyrosine kinase        | 1          |
| 210        | ENSG00000075624 | actin beta                                                | 7          |
| 261        | ENSG00000169129 | actin filament associated protein 1 like 2                | 10         |
| 22         | ENSG00000162704 | actin related protein 2/3 complex subunit 5               | 1          |
| 348        | ENSG00000072778 | acyl-CoA dehydrogenase very long chain                    | 17         |
| 86         | ENSG00000151726 | acyl-CoA synthetase long chain family member 1            | 4          |
| 58         | ENSG00000163638 | ADAM metalloproteinase with thrombospondin type 1 motif 9 | 3          |
| 139        | ENSG00000168710 | adenosylhomocysteinase like 1                             | 1          |



|     |                 |                                                          |    |
|-----|-----------------|----------------------------------------------------------|----|
| 99  | ENSG00000162433 | adenylate kinase 4                                       | 1  |
| 114 | ENSG00000153292 | adhesion G protein-coupled receptor F1                   | 6  |
| 206 | ENSG00000112414 | adhesion G protein-coupled receptor G6                   | 6  |
| 25  | ENSG00000143862 | ADP ribosylation factor like GTPase 8A                   | 1  |
| 55  | ENSG00000134108 | ADP ribosylation factor like GTPase 8B                   | 3  |
| 196 | ENSG00000169252 | adrenoceptor beta 2                                      | 5  |
| 2   | ENSG00000188157 | agrin                                                    | 1  |
| 226 | ENSG00000127914 | A-kinase anchoring protein 9                             | 7  |
| 48  | ENSG00000174574 | akirin 1                                                 | 1  |
| 69  | ENSG00000117448 | aldo-keto reductase family 1 member A1                   | 1  |
| 166 | ENSG00000151632 | aldo-keto reductase family 1 member C2                   | 10 |
| 167 | ENSG00000196139 | aldo-keto reductase family 1 member C3                   | 10 |
| 96  | ENSG00000088035 | ALG6 alpha-1,3-glucosyltransferase                       | 1  |
| 79  | ENSG00000109321 | amphiregulin                                             | 4  |
| 125 | ENSG00000162688 | amylo-alpha-1, 6-glucosidase, 4-alpha-glucanotransferase | 1  |
| 126 | ENSG00000146416 | androgen induced 1                                       | 6  |
| 45  | ENSG00000174501 | ankyrin repeat domain 36C                                | 2  |
| 245 | ENSG00000165272 | aquaporin 3 (Gill blood group)                           | 9  |
| 217 | ENSG00000172379 | aryl hydrocarbon receptor nuclear translocator 2         | 15 |
| 197 | ENSG00000183876 | arylsulfatase family member I                            | 5  |
| 184 | ENSG00000180801 | arylsulfatase family member J                            | 4  |
| 159 | ENSG00000165029 | ATP binding cassette subfamily A member 1                | 9  |
| 51  | ENSG00000144452 | ATP binding cassette subfamily A member 12               | 2  |
| 164 | ENSG00000107331 | ATP binding cassette subfamily A member 2                | 9  |
| 36  | ENSG00000130770 | ATP synthase inhibitory factor subunit 1                 | 1  |
| 78  | ENSG00000123472 | ATP synthase mitochondrial F1 complex assembly factor 1  | 1  |
| 141 | ENSG00000116459 | ATP synthase peripheral stalk-membrane subunit b         | 1  |
| 4   | ENSG00000160072 | ATPase family AAA domain containing 3B                   | 1  |
| 60  | ENSG00000114573 | ATPase H+ transporting V1 subunit A                      | 3  |
| 141 | ENSG00000147416 | ATPase H+ transporting V1 subunit B2                     | 8  |
| 149 | ENSG00000155097 | ATPase H+ transporting V1 subunit C1                     | 8  |
| 3   | ENSG00000175756 | aurora kinase A interacting protein 1                    | 1  |
| 332 | ENSG00000066739 | autophagy related 2B                                     | 14 |
| 382 | ENSG00000167601 | AXL receptor tyrosine kinase                             | 19 |
| 179 | ENSG00000043039 | BARX homeobox 2                                          | 11 |
| 175 | ENSG00000082153 | basic leucine zipper and W2 domains 1                    | 2  |
| 374 | ENSG00000172270 | basigin (Ok blood group)                                 | 19 |
| 337 | ENSG00000169594 | basonuclin 1                                             | 15 |
| 114 | ENSG00000142867 | BCL10 immune signaling adaptor                           | 1  |
| 212 | ENSG00000166710 | beta-2-microglobulin                                     | 15 |
| 80  | ENSG00000174808 | betacellulin                                             | 4  |
| 248 | ENSG00000182240 | beta-secretase 2                                         | 21 |
| 379 | ENSG00000130303 | bone marrow stromal cell antigen 2                       | 19 |
| 81  | ENSG00000152785 | bone morphogenetic protein 3                             | 4  |
| 188 | ENSG00000176788 | brain abundant membrane attached signal protein 1        | 5  |
| 245 | ENSG00000064787 | brain enriched myelin associated protein 1               | 20 |
| 261 | ENSG00000184515 | brain expressed X-linked 5                               | X  |
| 131 | ENSG00000164713 | brain protein I3                                         | 7  |
| 184 | ENSG00000060982 | branched chain amino acid transaminase 1                 | 12 |
| 336 | ENSG00000064726 | BTB domain containing 1                                  | 15 |
| 328 | ENSG00000011114 | BTB domain containing 7                                  | 14 |
| 136 | ENSG00000143126 | cadherin EGF LAG seven-pass G-type receptor 2            | 1  |
| 220 | ENSG00000103381 | calcineurin like phosphoesterase domain containing 1     | 16 |
| 320 | ENSG00000198668 | calmodulin 1                                             | 14 |
| 123 | ENSG00000117519 | calponin 3                                               | 1  |
| 223 | ENSG00000180917 | cap methyltransferase 2                                  | 16 |
| 142 | ENSG00000116489 | capping actin protein of muscle Z-line subunit alpha 1   | 1  |
| 216 | ENSG00000103811 | cathepsin H                                              | 15 |
| 5   | ENSG00000163131 | cathepsin S                                              | 1  |
| 367 | ENSG00000177469 | caveolae associated protein 1                            | 17 |
| 120 | ENSG00000272398 | CD24 molecule                                            | 6  |
| 237 | ENSG00000120217 | CD274 molecule                                           | 9  |
| 30  | ENSG00000196352 | CD55 molecule (Cromer blood group)                       | 1  |

|     |                 |                                                            |    |
|-----|-----------------|------------------------------------------------------------|----|
| 241 | ENSG00000086548 | CEA cell adhesion molecule 6                               | 19 |
| 58  | ENSG00000117399 | cell division cycle 20                                     | 1  |
| 18  | ENSG00000070831 | cell division cycle 42                                     | 1  |
| 116 | ENSG00000142871 | cellular communication network factor 1                    | 1  |
| 205 | ENSG00000118523 | cellular communication network factor 2                    | 6  |
| 151 | ENSG00000136999 | cellular communication network factor 3                    | 8  |
| 244 | ENSG00000044459 | centlein                                                   | 9  |
| 62  | ENSG00000047457 | ceruloplasmin                                              | 3  |
| 284 | ENSG00000166226 | chaperonin containing TCP1 subunit 2                       | 12 |
| 222 | ENSG00000146731 | chaperonin containing TCP1 subunit 6A                      | 7  |
| 133 | ENSG00000121940 | chloride channel CLIC like 1                               | 1  |
| 29  | ENSG00000169504 | chloride intracellular channel 4                           | 1  |
| 258 | ENSG00000171365 | chloride voltage-gated channel 5                           | X  |
| 103 | ENSG00000153046 | chromodomain Y like                                        | 6  |
| 224 | ENSG00000166446 | chromodomain Y like 2                                      | 16 |
| 113 | ENSG00000162642 | chromosome 1 open reading frame 52                         | 1  |
| 204 | ENSG00000227051 | chromosome 14 open reading frame 132                       | 14 |
| 76  | ENSG00000154274 | chromosome 4 open reading frame 19                         | 4  |
| 189 | ENSG00000082213 | chromosome 5 open reading frame 22                         | 5  |
| 213 | ENSG00000128849 | cingulin like 1                                            | 15 |
| 323 | ENSG00000165934 | cleavage and polyadenylation specific factor 2             | 14 |
| 314 | ENSG00000198894 | CLOCK interacting pacemaker                                | 14 |
| 149 | ENSG00000009307 | cold shock domain containing E1                            | 1  |
| 373 | ENSG00000183287 | collagen and calcium binding EGF domains 1                 | 18 |
| 203 | ENSG00000111799 | collagen type XII alpha 1 chain                            | 6  |
| 345 | ENSG00000108561 | complement C1q binding protein                             | 17 |
| 234 | ENSG00000125730 | complement C3                                              | 19 |
| 358 | ENSG00000141030 | COP9 signalosome subunit 3                                 | 17 |
| 279 | ENSG00000111481 | COPI coat complex subunit zeta 1                           | 12 |
| 386 | ENSG00000214078 | copine 1                                                   | 20 |
| 158 | ENSG00000106789 | coronin 2A                                                 | 9  |
| 77  | ENSG00000163739 | C-X-C motif chemokine ligand 1                             | 4  |
| 50  | ENSG00000131236 | cyclase associated actin cytoskeleton regulatory protein 1 | 1  |
| 227 | ENSG00000105810 | cyclin dependent kinase 6                                  | 7  |
| 156 | ENSG00000147883 | cyclin dependent kinase inhibitor 2B                       | 9  |
| 256 | ENSG00000008086 | cyclin dependent kinase like 5                             | X  |
| 86  | ENSG00000162377 | cytochrome c oxidase assembly factor 7 (putative)          | 1  |
| 293 | ENSG00000136026 | cytoskeleton associated protein 4                          | 12 |
| 329 | ENSG00000089737 | DEAD-box helicase 24                                       | 14 |
| 219 | ENSG00000136271 | DEAD-box helicase 56                                       | 7  |
| 135 | ENSG00000257093 | DENN domain containing 11                                  | 7  |
| 102 | ENSG00000024526 | DEP domain containing 1                                    | 1  |
| 252 | ENSG00000165732 | DExD-box helicase 21                                       | 10 |
| 330 | ENSG00000100697 | dicer 1, ribonuclease III                                  | 14 |
| 310 | ENSG00000119689 | dihydrolipoamide S-succinyltransferase                     | 14 |
| 115 | ENSG00000153904 | dimethylarginine dimethylaminohydrolase 1                  | 1  |
| 61  | ENSG00000132768 | diphthamide biosynthesis 2                                 | 1  |
| 129 | ENSG00000117543 | diphthamide biosynthesis 5                                 | 1  |
| 59  | ENSG00000057019 | discoidin, CUB and LCCL domain containing 2                | 3  |
| 241 | ENSG00000137038 | distal membrane arm assembly complex 1                     | 9  |
| 80  | ENSG00000142700 | DMRT like family A2                                        | 1  |
| 146 | ENSG00000118655 | DNA cross-link repair 1B                                   | 1  |
| 187 | ENSG00000136048 | DNA damage regulated autophagy modulator 1                 | 12 |
| 10  | ENSG00000160049 | DNA fragmentation factor subunit alpha                     | 1  |
| 120 | ENSG00000117505 | down-regulator of transcription 1                          | 1  |
| 198 | ENSG00000113758 | drebrin 1                                                  | 5  |
| 36  | ENSG00000143507 | dual specificity phosphatase 10                            | 1  |
| 227 | ENSG00000108861 | dual specificity phosphatase 3                             | 17 |
| 142 | ENSG00000120875 | dual specificity phosphatase 4                             | 8  |
| 307 | ENSG00000119661 | dynein axonemal light chain 1                              | 14 |
| 207 | ENSG00000197102 | dynein cytoplasmic 1 heavy chain 1                         | 14 |
| 202 | ENSG00000151914 | dystonin                                                   | 6  |
| 57  | ENSG00000117395 | EBNA1 binding protein 2                                    | 1  |

|     |                 |                                                           |     |
|-----|-----------------|-----------------------------------------------------------|-----|
| 79  | ENSG00000159658 | EF-hand calcium binding domain 14                         | 1   |
| 13  | ENSG00000142634 | EF-hand domain family member D2                           | 1   |
| 165 | ENSG00000115380 | EGF containing fibulin extracellular matrix protein 1     | 2   |
| 24  | ENSG00000011007 | elongin A                                                 | 1   |
| 59  | ENSG00000066322 | ELOVL fatty acid elongase 1                               | 1   |
| 9   | ENSG00000074800 | enolase 1                                                 | 1   |
| 19  | ENSG00000133216 | EPH receptor B2                                           | 1   |
| 221 | ENSG00000146648 | epidermal growth factor receptor                          | 7   |
| 82  | ENSG00000085832 | epidermal growth factor receptor pathway substrate 15     | 1   |
| 78  | ENSG00000124882 | epiregulin                                                | 4   |
| 56  | ENSG00000134109 | ER degradation enhancing alpha-mannosidase like protein 1 | 3   |
| 34  | ENSG00000196482 | estrogen related receptor gamma                           | 1   |
| 69  | ENSG00000244405 | ETS variant transcription factor 5                        | 3   |
| 246 | ENSG00000101210 | eukaryotic translation elongation factor 1 alpha 2        | 20  |
| 46  | ENSG00000084623 | eukaryotic translation initiation factor 3 subunit I      | 1   |
| 277 | ENSG00000063046 | eukaryotic translation initiation factor 4B               | 12  |
| 349 | ENSG00000132507 | eukaryotic translation initiation factor 5A               | 17  |
| 385 | ENSG00000242372 | eukaryotic translation initiation factor 6                | 20  |
| 127 | ENSG00000162694 | exostosin like glycosyltransferase 2                      | 1   |
| 20  | ENSG00000116199 | FAM20B glycosaminoglycan xylosylkinase                    | 1   |
| 208 | ENSG00000177706 | FAM20C golgi associated secretory pathway kinase          | 7   |
| 133 | ENSG00000196937 | FAM3 metabolism regulating signaling molecule C           | 7   |
| 214 | ENSG00000157470 | family with sequence similarity 81 member A               | 15  |
| 152 | ENSG00000147689 | family with sequence similarity 83 member A               | 8   |
| 234 | ENSG00000168522 | farnesyltransferase, CAAX box, alpha                      | 8   |
| 211 | ENSG00000075618 | fascin actin-bundling protein 1                           | 7   |
| 265 | ENSG00000149485 | fatty acid desaturase 1                                   | 11  |
| 309 | ENSG00000119616 | FCF1 rRNA-processing protein                              | 14  |
| 303 | ENSG00000139926 | FERM domain containing 6                                  | 14  |
| 124 | ENSG00000156869 | ferric chelate reductase 1                                | 1   |
| 267 | ENSG00000172500 | FGF1 intracellular binding protein                        | 11  |
| 269 | ENSG00000075388 | fibroblast growth factor 4                                | 11  |
| 182 | ENSG00000137440 | fibroblast growth factor binding protein 1                | 4   |
| 264 | ENSG00000066468 | fibroblast growth factor receptor 2                       | 10  |
| 72  | ENSG00000068078 | fibroblast growth factor receptor 3                       | 4   |
| 52  | ENSG00000115414 | fibronectin 1                                             | 2   |
| 366 | ENSG00000141756 | FKBP prolyl isomerase 10                                  | 17  |
| 216 | ENSG00000106080 | FKBP prolyl isomerase 14                                  | 7   |
| 94  | ENSG00000217128 | folliculin interacting protein 1                          | 5   |
| 85  | ENSG00000052795 | folliculin interacting protein 2                          | 4   |
| 52  | ENSG00000198815 | forkhead box J3                                           | 1   |
| 100 | ENSG00000164379 | forkhead box Q1                                           | 6   |
| 211 | ENSG00000248905 | formin 1                                                  | 15  |
| 121 | ENSG00000137942 | formin binding protein 1 like                             | 1   |
| 313 | ENSG00000170345 | Fos proto-oncogene, AP-1 transcription factor subunit     | 14  |
| 253 | ENSG00000196968 | fucosyltransferase 11                                     | 10  |
| 89  | ENSG00000082074 | FYN binding protein 1                                     | 5   |
| 122 | ENSG00000111816 | fyn related Src family tyrosine kinase                    | 6   |
| 132 | ENSG00000121957 | G protein signaling modulator 2                           | 1   |
| 138 | ENSG00000065135 | G protein subunit alpha i3                                | 1   |
| 41  | ENSG00000116977 | galectin 8                                                | 1   |
| 154 | ENSG00000196505 | ganglioside induced differentiation associated protein 2  | 1   |
| 204 | ENSG00000152661 | gap junction protein alpha 1                              | 6   |
| 1   | ENSG00000189433 | gap junction protein beta 4                               | 1   |
| 368 | ENSG00000182963 | gap junction protein gamma 1                              | 17  |
| 71  | ENSG00000159592 | GC-rich promoter binding protein 1 like 1                 | 1   |
|     | ENSEMBL         | GENENAME                                                  | CHR |
|     | ENSEMBL         | GENENAME                                                  | CHR |
| 231 | ENSG00000147536 | GIN5 complex subunit 4                                    | 8   |
| 96  | ENSG00000113552 | glucosamine-6-phosphate deaminase 1                       | 5   |
| 104 | ENSG00000111846 | glucosaminyl (N-acetyl) transferase 2 (I blood group)     | 6   |
| 215 | ENSG00000140297 | glucosaminyl (N-acetyl) transferase 3, mucin type         | 15  |
| 11  | ENSG00000177628 | glucosylceramidase beta                                   | 1   |

|     |                 |                                                       |    |
|-----|-----------------|-------------------------------------------------------|----|
| 255 | ENSG00000148672 | glutamate dehydrogenase 1                             | 10 |
| 173 | ENSG00000115419 | glutaminase                                           | 2  |
| 296 | ENSG00000257218 | glutamyl-tRNA amidotransferase subunit C              | 12 |
| 331 | ENSG00000182512 | glutaredoxin 5                                        | 14 |
| 143 | ENSG00000104687 | glutathione-disulfide reductase                       | 8  |
| 82  | ENSG00000138678 | glycerol-3-phosphate acyltransferase 3                | 4  |
| 302 | ENSG00000100504 | glycogen phosphorylase L                              | 14 |
| 129 | ENSG00000136235 | glycoprotein nmb                                      | 7  |
| 13  | ENSG00000198715 | glycosylated lysosomal membrane protein               | 1  |
| 179 | ENSG00000063660 | glypican 1                                            | 2  |
| 325 | ENSG00000066455 | golgin A5                                             | 14 |
| 326 | ENSG00000170270 | GON7 subunit of KEOPS complex                         | 14 |
| 101 | ENSG00000116717 | growth arrest and DNA damage inducible alpha          | 1  |
| 238 | ENSG00000130513 | growth differentiation factor 15                      | 19 |
| 224 | ENSG00000105793 | GTP binding protein 10                                | 7  |
| 157 | ENSG00000119125 | guanine deaminase                                     | 9  |
| 3   | ENSG00000183347 | guanylate binding protein family member 6             | 1  |
| 48  | ENSG00000144366 | GULP PTB domain containing engulfment adaptor 1       | 2  |
| 201 | ENSG00000273703 | H2B clustered histone 14                              | 6  |
| 199 | ENSG00000276410 | H2B clustered histone 3                               | 6  |
| 200 | ENSG00000276180 | H4 clustered histone 9                                | 6  |
| 190 | ENSG00000135116 | harakiri, BCL2 interacting protein                    | 12 |
| 42  | ENSG00000118960 | HCLS1 binding protein 3                               | 2  |
| 192 | ENSG00000152137 | heat shock protein family B (small) member 8          | 12 |
| 174 | ENSG00000144381 | heat shock protein family D (Hsp60) member 1          | 2  |
| 64  | ENSG00000126107 | HECT domain E3 ubiquitin protein ligase 3             | 1  |
| 95  | ENSG00000113070 | heparin binding EGF like growth factor                | 5  |
| 17  | ENSG00000127483 | heterochromatin protein 1 binding protein 3           | 1  |
| 22  | ENSG00000125944 | heterogeneous nuclear ribonucleoprotein R             | 1  |
| 92  | ENSG00000049860 | hexosaminidase subunit beta                           | 5  |
| 31  | ENSG00000198830 | high mobility group nucleosomal binding domain 2      | 1  |
| 106 | ENSG00000095951 | HIVEP zinc finger 1                                   | 6  |
| 125 | ENSG00000010818 | HIVEP zinc finger 2                                   | 6  |
| 111 | ENSG00000206337 | HLA complex P5                                        | 6  |
| 97  | ENSG00000113716 | HMG-box containing 3                                  | 5  |
| 201 | ENSG00000215271 | homeobox and leucine zipper encoding                  | 14 |
| 233 | ENSG00000168172 | hook microtubule tethering protein 3                  | 8  |
| 203 | ENSG00000100644 | hypoxia inducible factor 1 subunit alpha              | 14 |
| 50  | ENSG00000030419 | IKAROS family zinc finger 2                           | 2  |
| 291 | ENSG00000166130 | IKBKB interacting protein                             | 12 |
| 151 | ENSG00000143061 | immunoglobulin superfamily member 3                   | 1  |
| 23  | ENSG00000117318 | inhibitor of DNA binding 3, HLH protein               | 1  |
| 181 | ENSG00000178035 | inosine monophosphate dehydrogenase 2                 | 3  |
| 84  | ENSG00000109452 | inositol polyphosphate-4-phosphatase type II B        | 4  |
| 369 | ENSG00000159217 | insulin like growth factor 2 mRNA binding protein 1   | 17 |
| 215 | ENSG00000136231 | insulin like growth factor 2 mRNA binding protein 3   | 7  |
| 278 | ENSG00000167779 | insulin like growth factor binding protein 6          | 12 |
| 235 | ENSG00000171105 | insulin receptor                                      | 19 |
| 90  | ENSG00000164171 | integrin subunit alpha 2                              | 5  |
| 172 | ENSG00000091409 | integrin subunit alpha 6                              | 2  |
| 212 | ENSG00000105855 | integrin subunit beta 8                               | 7  |
| 236 | ENSG00000090339 | intercellular adhesion molecule 1                     | 19 |
| 111 | ENSG00000137965 | interferon induced protein 44                         | 1  |
| 169 | ENSG00000125538 | interleukin 1 beta                                    | 2  |
| 164 | ENSG00000162892 | interleukin 24                                        | 1  |
| 10  | ENSG00000160712 | interleukin 6 receptor                                | 1  |
| 73  | ENSG00000197429 | intracisternal A particle-promoted polypeptide        | 1  |
| 185 | ENSG00000170561 | iroquois homeobox 2                                   | 5  |
| 1   | ENSG00000187608 | ISG15 ubiquitin like modifier                         | 1  |
| 98  | ENSG00000162434 | Janus kinase 1                                        | 1  |
| 236 | ENSG00000096968 | Janus kinase 2                                        | 9  |
| 94  | ENSG00000177606 | Jun proto-oncogene, AP-1 transcription factor subunit | 1  |
| 383 | ENSG00000167754 | kallikrein related peptidase 5                        | 19 |

|     |                 |                                                                      |    |
|-----|-----------------|----------------------------------------------------------------------|----|
| 384 | ENSG00000167755 | kallikrein related peptidase 6                                       | 19 |
| 44  | ENSG00000025800 | karyopherin subunit alpha 6                                          | 1  |
| 167 | ENSG00000114982 | KAT8 regulatory NSL complex subunit 3                                | 2  |
| 68  | ENSG00000114796 | kelch like family member 24                                          | 3  |
| 138 | ENSG00000176595 | kelch repeat and BTB domain containing 11                            | 8  |
| 365 | ENSG00000186847 | keratin 14                                                           | 17 |
| 364 | ENSG00000171345 | keratin 19                                                           | 17 |
| 185 | ENSG00000170477 | keratin 4                                                            | 12 |
| 276 | ENSG00000205420 | keratin 6A                                                           | 12 |
| 19  | ENSG00000235750 | KIAA0040                                                             | 1  |
| 218 | ENSG00000164542 | KIAA0895                                                             | 7  |
| 11  | ENSG00000116685 | KIAA2013                                                             | 1  |
| 305 | ENSG00000126777 | kinectin 1                                                           | 14 |
| 62  | ENSG00000142945 | kinesin family member 2C                                             | 1  |
| 287 | ENSG00000049130 | KIT ligand                                                           | 12 |
| 24  | ENSG00000159166 | ladinin 1                                                            | 1  |
| 250 | ENSG00000133424 | LARGE xylosyl- and glucuronyltransferase 1                           | 22 |
| 43  | ENSG00000213626 | LBH regulator of WNT signaling pathway                               | 2  |
| 324 | ENSG00000100600 | legumain                                                             | 14 |
| 103 | ENSG00000066557 | leucine rich repeat containing 40                                    | 1  |
| 74  | ENSG00000132128 | leucine rich repeat containing 41                                    | 1  |
| 88  | ENSG00000116212 | leucine rich repeat containing 42                                    | 1  |
| 21  | ENSG00000169641 | leucine zipper protein 1                                             | 1  |
| 249 | ENSG00000128342 | LIF interleukin 6 family cytokine                                    | 22 |
| 274 | ENSG00000050405 | LIM domain and actin binding 1                                       | 12 |
| 70  | ENSG00000145012 | LIM domain containing preferred translocation partner in lipoma      | 3  |
| 161 | ENSG00000148346 | lipocalin 2                                                          | 9  |
| 219 | ENSG00000189067 | lipopolysaccharide induced TNF factor                                | 16 |
| 359 | ENSG00000131899 | LLGL scribble cell polarity complex component 1                      | 17 |
| 117 | ENSG00000233237 | long intergenic non-protein coding RNA 472                           | 6  |
| 370 | ENSG00000227036 | long intergenic non-protein coding RNA 511                           | 17 |
| 380 | ENSG00000261824 | long intergenic non-protein coding RNA 662                           | 19 |
| 371 | ENSG00000227036 | long intergenic non-protein coding RNA 673                           | 17 |
| 67  | ENSG00000240024 | long intergenic non-protein coding RNA 888                           | 3  |
| 153 | ENSG00000168672 | LRAT domain containing 2                                             | 8  |
| 154 | ENSG00000160932 | lymphocyte antigen 6 family member E                                 | 8  |
| 193 | ENSG00000136167 | lymphocyte cytosolic protein 1                                       | 13 |
| 20  | ENSG00000004487 | lysine demethylase 1A                                                | 1  |
| 44  | ENSG00000172086 | lysine rich coiled-coil 1                                            | 2  |
| 32  | ENSG00000123684 | lysophosphatidylglycerol acyltransferase 1                           | 1  |
| 26  | ENSG00000011009 | lysophospholipase 2                                                  | 1  |
| 199 | ENSG00000185896 | lysosomal associated membrane protein 1                              | 13 |
| 262 | ENSG00000005893 | lysosomal associated membrane protein 2                              | X  |
| 40  | ENSG00000143669 | lysosomal trafficking regulator                                      | 1  |
| 258 | ENSG00000138131 | lysyl oxidase like 4                                                 | 10 |
| 230 | ENSG00000197063 | MAF bZIP transcription factor G                                      | 17 |
| 110 | ENSG00000234745 | major histocompatibility complex, class I, B                         | 6  |
| 108 | ENSG00000204642 | major histocompatibility complex, class I, F                         | 6  |
| 150 | ENSG00000147676 | mal, T cell differentiation protein 2                                | 8  |
| 181 | ENSG00000003056 | mannose-6-phosphate receptor, cation dependent                       | 12 |
| 77  | ENSG00000079277 | MAPK interacting serine/threonine kinase 1                           | 1  |
| 177 | ENSG00000196611 | matrix metalloproteinase 1                                           | 11 |
| 197 | ENSG00000126217 | MCF.2 cell line derived transforming sequence like                   | 13 |
| 60  | ENSG00000159479 | mediator complex subunit 8                                           | 1  |
| 144 | ENSG00000081026 | membrane associated guanylate kinase, WW and PDZ domain containing 3 | 1  |
| 132 | ENSG00000105976 | MET proto-oncogene, receptor tyrosine kinase                         | 7  |
| 340 | ENSG00000169715 | metallothionein 1E                                                   | 16 |
| 378 | ENSG00000071655 | methyl-CpG binding domain protein 3                                  | 19 |
| 37  | ENSG00000154305 | MIA SH3 domain ER export factor 3                                    | 1  |
| 139 | ENSG00000129422 | microtubule associated scaffold protein 1                            | 8  |
| 91  | ENSG00000069020 | microtubule associated serine/threonine kinase family member 4       | 5  |
| 14  | ENSG00000125462 | MIR9-1 host gene                                                     | 1  |
| 346 | ENSG00000167842 | MIS12 kinetochore complex component                                  | 17 |

|     |                 |                                                                   |    |
|-----|-----------------|-------------------------------------------------------------------|----|
| 90  | ENSG00000116221 | mitochondrial ribosomal protein L37                               | 1  |
| 259 | ENSG00000055950 | mitochondrial ribosomal protein L43                               | 10 |
| 12  | ENSG00000116688 | mitofusin 2                                                       | 1  |
| 304 | ENSG00000168175 | mitogen-activated protein kinase 1 interacting protein 1 like     | 14 |
| 308 | ENSG00000156030 | mitotic deacetylase associated SANT domain protein                | 14 |
| 375 | ENSG00000099812 | mitotic spindle positioning                                       | 19 |
| 208 | ENSG00000080823 | MOK protein kinase                                                | 14 |
| 16  | ENSG00000053372 | MRT4 homolog, ribosome maturation factor                          | 1  |
| 2   | ENSG00000055732 | mucolipin 3                                                       | 1  |
| 93  | ENSG00000162601 | Myb like, SWIRM and MPN domains 1                                 | 1  |
| 47  | ENSG00000214114 | MYC binding protein                                               | 1  |
| 361 | ENSG00000278259 | myosin XIX                                                        | 17 |
| 102 | ENSG00000260604 | NA                                                                | NA |
| 88  | ENSG00000248370 | NA                                                                | NA |
| 195 | ENSG00000275989 | NA                                                                | NA |
| 196 | ENSG00000225760 | NA                                                                | NA |
| 198 | ENSG00000235280 | NA                                                                | NA |
| 225 | ENSG00000263934 | NA                                                                | NA |
| 56  | ENSG00000228192 | NA                                                                | NA |
| 162 | ENSG00000275131 | NA                                                                | NA |
| 249 | ENSG00000273760 | NA                                                                | NA |
| 355 | ENSG00000179277 | NA                                                                | NA |
| 356 | ENSG00000276855 | NA                                                                | NA |
| 388 | ENSG00000198618 | NA                                                                | NA |
| 392 | ENSG00000210196 | NA                                                                | NA |
| 140 | ENSG00000104763 | N-acylsphingosine amidohydrolase 1                                | 8  |
| 83  | ENSG00000078618 | nardilysin convertase                                             | 1  |
| 282 | ENSG00000196531 | nascent polypeptide associated complex subunit alpha              | 12 |
| 87  | ENSG00000058804 | NDC1 transmembrane nucleoporin                                    | 1  |
| 16  | ENSG00000143217 | nectin cell adhesion molecule 4                                   | 1  |
| 98  | ENSG00000145911 | NEDD4 binding protein 3                                           | 5  |
| 352 | ENSG00000065320 | netrin 1                                                          | 17 |
| 105 | ENSG00000111859 | neural precursor cell expressed, developmentally down-regulated 9 | 6  |
| 112 | ENSG00000204386 | neuraminidase 1                                                   | 6  |
| 163 | ENSG00000107130 | neuronal calcium sensor 1                                         | 9  |
| 163 | ENSG00000135842 | niban apoptosis regulator 1                                       | 1  |
| 160 | ENSG00000136830 | niban apoptosis regulator 2                                       | 9  |
| 311 | ENSG00000119638 | NIMA related kinase 9                                             | 14 |
| 148 | ENSG00000104361 | NIPA like domain containing 2                                     | 8  |
| 136 | ENSG00000164867 | nitric oxide synthase 3                                           | 7  |
| 169 | ENSG00000229544 | NK1 homeobox 2                                                    | 10 |
| 221 | ENSG00000140853 | NLR family CARD domain containing 5                               | 16 |
| 347 | ENSG00000091592 | NLR family pyrin domain containing 1                              | 17 |
| 218 | ENSG00000103202 | NME/NM23 nucleoside diphosphate kinase 4                          | 16 |
| 186 | ENSG00000037474 | NOP2/Sun RNA methyltransferase 2                                  | 5  |
| 76  | ENSG00000117481 | NOP2/Sun RNA methyltransferase 4                                  | 1  |
| 160 | ENSG00000134250 | notch receptor 2                                                  | 1  |
| 148 | ENSG00000213281 | NRAS proto-oncogene, GTPase                                       | 1  |
| 319 | ENSG00000119720 | NRDE-2, necessary for RNA interference, domain containing         | 14 |
| 70  | ENSG00000132780 | nuclear autoantigenic sperm protein                               | 1  |
| 243 | ENSG00000124151 | nuclear receptor coactivator 3                                    | 20 |
| 123 | ENSG00000111912 | nuclear receptor coactivator 7                                    | 6  |
| 93  | ENSG00000175745 | nuclear receptor subfamily 2 group F member 1                     | 5  |
| 281 | ENSG00000139579 | nucleic acid binding protein 2                                    | 12 |
| 260 | ENSG00000166197 | nucleolar and coiled-body phosphoprotein 1                        | 10 |
| 7   | ENSG00000162408 | nucleolar protein 9                                               | 1  |
| 260 | ENSG00000186462 | nucleosome assembly protein 1 like 2                              | X  |
| 251 | ENSG00000226328 | NUP50 divergent transcript                                        | 22 |
| 178 | ENSG00000124006 | obscurin like cytoskeletal adaptor 1                              | 2  |
| 84  | ENSG00000085840 | origin recognition complex subunit 1                              | 1  |
| 176 | ENSG00000115942 | origin recognition complex subunit 2                              | 2  |
| 121 | ENSG00000081087 | osteoclastogenesis associated transmembrane protein 1             | 6  |
| 146 | ENSG00000164823 | oxidative stress induced growth inhibitor family member 2         | 8  |



|     |                 |                                                                          |    |
|-----|-----------------|--------------------------------------------------------------------------|----|
| 182 | ENSG00000173391 | oxidized low density lipoprotein receptor 1                              | 12 |
| 228 | ENSG00000242265 | paternally expressed 10                                                  | 7  |
| 243 | ENSG00000164985 | PC4 and SFRS1 interacting protein 1                                      | 9  |
| 257 | ENSG00000107438 | PDZ and LIM domain 1                                                     | 10 |
| 43  | ENSG00000162517 | penta-EF-hand domain containing 1                                        | 1  |
| 220 | ENSG00000196262 | peptidylprolyl isomerase A                                               | 7  |
| 68  | ENSG00000117450 | peroxiredoxin 1                                                          | 1  |
| 263 | ENSG00000165672 | peroxiredoxin 3                                                          | 10 |
| 252 | ENSG00000186951 | peroxisome proliferator activated receptor alpha                         | 22 |
| 299 | ENSG00000247077 | PGAM family member 5, mitochondrial serine/threonine protein phosphatase | 12 |
| 391 | ENSG00000177096 | PH domain containing endocytic trafficking adaptor 2                     | 22 |
| 108 | ENSG00000142892 | phosphatidylinositol glycan anchor biosynthesis class K                  | 1  |
| 362 | ENSG00000276293 | phosphatidylinositol-5-phosphate 4-kinase type 2 beta                    | 17 |
| 210 | ENSG00000179364 | phosphofurin acidic cluster sorting protein 2                            | 14 |
| 97  | ENSG00000079739 | phosphoglucosyltransferase 1                                             | 1  |
| 159 | ENSG00000092621 | phosphoglycerate dehydrogenase                                           | 1  |
| 53  | ENSG00000127125 | phosphopantotheneoylcysteine synthetase                                  | 1  |
| 253 | ENSG00000198355 | Pim-3 proto-oncogene, serine/threonine kinase                            | 22 |
| 25  | ENSG00000057757 | PITH domain containing 1                                                 | 1  |
| 207 | ENSG00000118495 | PLAG1 like zinc finger 1                                                 | 6  |
| 209 | ENSG00000197461 | platelet derived growth factor subunit A                                 | 7  |
| 240 | ENSG00000166289 | pleckstrin homology and FYVE domain containing 1                         | 19 |
| 306 | ENSG00000126822 | pleckstrin homology and RhoGEF domain containing G3                      | 14 |
| 186 | ENSG00000139289 | pleckstrin homology like domain family A member 1                        | 12 |
| 17  | ENSG00000143157 | pogo transposable element derived with KRAB domain                       | 1  |
| 333 | ENSG00000090060 | poly(A) polymerase alpha                                                 | 14 |
| 28  | ENSG00000162896 | polymeric immunoglobulin receptor                                        | 1  |
| 47  | ENSG00000136542 | polypeptide N-acetylgalactosaminyltransferase 5                          | 2  |
| 275 | ENSG00000139629 | polypeptide N-acetylgalactosaminyltransferase 6                          | 12 |
| 390 | ENSG00000157551 | potassium inwardly rectifying channel subfamily J member 15              | 21 |
| 85  | ENSG00000134748 | pre-mRNA processing factor 38A                                           | 1  |
| 131 | ENSG00000134186 | pre-mRNA processing factor 38B                                           | 1  |
| 285 | ENSG00000177425 | pro-apoptotic WT1 regulator                                              | 12 |
| 344 | ENSG00000108518 | profilin 1                                                               | 17 |
| 15  | ENSG00000162734 | proliferation and apoptosis adaptor protein 15                           | 1  |
| 137 | ENSG00000134222 | proline and serine rich coiled-coil 1                                    | 1  |
| 27  | ENSG00000189266 | proline rich nuclear receptor coactivator 2                              | 1  |
| 55  | ENSG00000117385 | prolyl 3-hydroxylase 1                                                   | 1  |
| 92  | ENSG00000169174 | proprotein convertase subtilisin/kexin type 9                            | 1  |
| 162 | ENSG00000148344 | prostaglandin E synthase                                                 | 9  |
| 152 | ENSG00000134247 | prostaglandin F2 receptor inhibitor                                      | 1  |
| 247 | ENSG00000095303 | prostaglandin-endoperoxide synthase 1                                    | 9  |
| 343 | ENSG00000142507 | proteasome 20S subunit beta 6                                            | 17 |
| 318 | ENSG00000100764 | proteasome 26S subunit, ATPase 1                                         | 14 |
| 112 | ENSG00000142875 | protein kinase cAMP-activated catalytic subunit beta                     | 1  |
| 180 | ENSG00000114302 | protein kinase cAMP-dependent type II regulatory subunit alpha           | 3  |
| 235 | ENSG00000185900 | protein O-mannose kinase                                                 | 8  |
| 26  | ENSG00000077157 | protein phosphatase 1 regulatory subunit 12B                             | 1  |
| 256 | ENSG00000119938 | protein phosphatase 1 regulatory subunit 3C                              | 10 |
| 34  | ENSG00000117751 | protein phosphatase 1 regulatory subunit 8                               | 1  |
| 33  | ENSG00000066027 | protein phosphatase 2 regulatory subunit B'alpha                         | 1  |
| 206 | ENSG00000078304 | protein phosphatase 2 regulatory subunit B'gamma                         | 14 |
| 321 | ENSG00000100796 | protein phosphatase 4 regulatory subunit 3A                              | 14 |
| 124 | ENSG00000152894 | protein tyrosine phosphatase receptor type K                             | 6  |
| 271 | ENSG00000129317 | pseudouridine synthase 7 like                                            | 12 |
| 257 | ENSG00000067992 | pyruvate dehydrogenase kinase 3                                          | X  |
| 147 | ENSG00000164951 | pyruvate dehydrogenase phosphatase catalytic subunit 1                   | 8  |
| 107 | ENSG00000137955 | Rab geranylgeranyltransferase subunit beta                               | 1  |
| 27  | ENSG00000117280 | RAB29, member RAS oncogene family                                        | 1  |
| 372 | ENSG00000168461 | RAB31, member RAS oncogene family                                        | 18 |
| 61  | ENSG00000075785 | RAB7A, member RAS oncogene family                                        | 3  |
| 255 | ENSG00000123595 | RAB9A, member RAS oncogene family                                        | X  |
| 18  | ENSG00000227373 | RABGAP1L divergent transcript                                            | 1  |



|     |                  |                                                            |    |
|-----|------------------|------------------------------------------------------------|----|
| 239 | ENSG00000137040  | RAN binding protein 6                                      | 9  |
| 298 | ENSG00000132341  | RAN, member RAS oncogene family                            | 12 |
| 268 | ENSG00000173156  | ras homolog family member D                                | 11 |
| 137 | ENSG00000106615  | Ras homolog, mTORC1 binding                                | 7  |
| 170 | ENSG00000144118  | RAS like proto-oncogene B                                  | 2  |
| 12  | ENSG00000143622  | Ras like without CAAX 1                                    | 1  |
| 119 | ENSG00000025039  | Ras related GTP binding D                                  | 6  |
| 118 | ENSG00000213516  | RBMX like 1                                                | 1  |
| 194 | ENSG00000136144  | RCC1 and BTB domain containing protein 1                   | 13 |
| 341 | ENSG00000183688  | refilin B                                                  | 17 |
| 37  | ENSG00000180198  | regulator of chromosome condensation 1                     | 1  |
| 15  | ENSG00000179051  | regulator of chromosome condensation 2                     | 1  |
| 73  | ENSG00000159788  | regulator of G protein signaling 12                        | 4  |
| 35  | ENSG00000117748  | replication protein A2                                     | 1  |
| 5   | ENSG00000157916  | retention in endoplasmic reticulum sorting receptor 1      | 1  |
| 65  | ENSG00000118849  | retinoic acid receptor responder 1                         | 3  |
| 122 | ENSG00000137962  | Rho GTPase activating protein 29                           | 1  |
| 166 | ENSG00000114993  | rhotekin                                                   | 2  |
| 200 | ENSG00000165799  | ribonuclease A family member 7                             | 14 |
| 363 | ENSG00000108298  | ribosomal protein L19                                      | 17 |
| 6   | ENSG00000116251  | ribosomal protein L22                                      | 1  |
| 193 | ENSG00000145592  | ribosomal protein L37                                      | 5  |
| 280 | ENSG00000229117  | ribosomal protein L41                                      | 12 |
| 295 | ENSG000000089157 | ribosomal protein lateral stalk subunit P0                 | 12 |
| 377 | ENSG00000115268  | ribosomal protein S15                                      | 19 |
| 63  | ENSG00000142937  | ribosomal protein S8                                       | 1  |
| 238 | ENSG00000107036  | RIC1 homolog, RAB6A GEF complex partner 1                  | 9  |
| 81  | ENSG00000123091  | ring finger protein 11                                     | 1  |
| 171 | ENSG00000153250  | RNA binding motif single stranded interacting protein 1    | 2  |
| 350 | ENSG00000181222  | RNA polymerase II subunit A                                | 17 |
| 145 | ENSG000000081019 | round spermatid basic protein 1                            | 1  |
| 9   | ENSG00000197956  | S100 calcium binding protein A6                            | 1  |
| 8   | ENSG00000163220  | S100 calcium binding protein A9                            | 1  |
| 74  | ENSG00000163993  | S100 calcium binding protein P                             | 4  |
| 161 | ENSG00000265808  | SEC22 homolog B, vesicle trafficking protein               | 1  |
| 242 | ENSG00000124107  | secretory leukocyte peptidase inhibitor                    | 20 |
| 75  | ENSG000000091490 | SEL1L family member 3                                      | 4  |
| 223 | ENSG000000075213 | semaphorin 3A                                              | 7  |
| 217 | ENSG00000122545  | septin 7                                                   | 7  |
| 99  | ENSG00000161011  | sequestosome 1                                             | 5  |
| 28  | ENSG00000188529  | serine and arginine rich splicing factor 10                | 1  |
| 104 | ENSG00000116754  | serine and arginine rich splicing factor 11                | 1  |
| 40  | ENSG00000116350  | serine and arginine rich splicing factor 4                 | 1  |
| 270 | ENSG00000150687  | serine protease 23                                         | 11 |
| 376 | ENSG00000118046  | serine/threonine kinase 11                                 | 19 |
| 101 | ENSG00000170542  | serpin family B member 9                                   | 6  |
| 100 | ENSG00000142864  | SERPINE1 mRNA binding protein 1                            | 1  |
| 31  | ENSG000000082497 | SERTA domain containing 4                                  | 1  |
| 135 | ENSG000000031698 | seryl-tRNA synthetase 1                                    | 1  |
| 205 | ENSG00000183576  | SET domain containing 3, actin histidine methyltransferase | 14 |
| 262 | ENSG00000187164  | shootin 1                                                  | 10 |
| 283 | ENSG00000166888  | signal transducer and activator of transcription 6         | 12 |
| 266 | ENSG00000213445  | signal-induced proliferation-associated 1                  | 11 |
| 113 | ENSG00000186577  | small integral membrane protein 29                         | 6  |
| 41  | ENSG000000060688 | small nuclear ribonucleoprotein U5 subunit 40              | 1  |
| 242 | ENSG00000164975  | small nuclear RNA activating complex polypeptide 3         | 9  |
| 214 | ENSG00000228649  | small nucleolar RNA host gene 26                           | 7  |
| 357 | ENSG00000175061  | small nucleolar RNA host gene 29                           | 17 |
| 38  | ENSG00000242125  | small nucleolar RNA host gene 3                            | 1  |
| 39  | ENSG00000200087  | small nucleolar RNA, H/ACA box 73B                         | 1  |
| 192 | ENSG00000079215  | solute carrier family 1 member 3                           | 5  |
| 143 | ENSG00000155380  | solute carrier family 16 member 1                          | 1  |
| 180 | ENSG000000059804 | solute carrier family 2 member 3                           | 12 |

|     |                  |                                                                              |    |
|-----|------------------|------------------------------------------------------------------------------|----|
| 202 | ENSG00000183032  | solute carrier family 25 member 21                                           | 14 |
| 290 | ENSG00000075415  | solute carrier family 25 member 3                                            | 12 |
| 128 | ENSG00000162695  | solute carrier family 30 member 7                                            | 1  |
| 126 | ENSG00000117620  | solute carrier family 35 member A3                                           | 1  |
| 106 | ENSG00000137968  | solute carrier family 44 member 5                                            | 1  |
| 389 | ENSG00000198743  | solute carrier family 5 member 3                                             | 21 |
| 57  | ENSG00000131389  | solute carrier family 6 member 6                                             | 3  |
| 83  | ENSG00000151012  | solute carrier family 7 member 11                                            | 4  |
| 230 | ENSG00000120896  | sorbin and SH3 domain containing 3                                           | 8  |
| 168 | ENSG00000198142  | sosondowah ankyrin repeat domain family member C                             | 2  |
| 229 | ENSG00000008294  | sperm associated antigen 9                                                   | 17 |
| 191 | ENSG00000145604  | S-phase kinase associated protein 2                                          | 5  |
| 232 | ENSG00000134278  | spire type actin nucleation factor 1                                         | 18 |
| 30  | ENSG00000117632  | stathmin 1                                                                   | 1  |
| 247 | ENSG00000197457  | stathmin 3                                                                   | 20 |
| 130 | ENSG00000127954  | STEAP4 metalloredutase                                                       | 7  |
| 187 | ENSG00000145545  | steroid 5 alpha-reductase 1                                                  | 5  |
| 246 | ENSG00000148175  | stomatin                                                                     | 9  |
| 315 | ENSG00000140022  | stonin 2                                                                     | 14 |
| 32  | ENSG00000175793  | stratifin                                                                    | 1  |
| 190 | ENSG00000113387  | SUB1 regulator of transcription                                              | 5  |
| 387 | ENSG00000196562  | sulfatase 2                                                                  | 20 |
| 53  | ENSG00000144455  | sulfatase modifying factor 1                                                 | 3  |
| 288 | ENSG00000120833  | suppressor of cytokine signaling 2                                           | 12 |
| 14  | ENSG00000055070  | SUZ RNA binding domain containing 1                                          | 1  |
| 176 | ENSG00000137501  | synaptotagmin like 2                                                         | 11 |
| 171 | ENSG00000166900  | syntaxin 3                                                                   | 11 |
| 353 | ENSG00000133028  | synthesis of cytochrome C oxidase 1                                          | 17 |
| 67  | ENSG00000132773  | target of EGR1, exonuclease                                                  | 1  |
| 134 | ENSG00000197780  | TATA-box binding protein associated factor 13                                | 1  |
| 45  | ENSG00000084652  | taxilin alpha                                                                | 1  |
| 66  | ENSG00000177565  | TBL1X receptor 1                                                             | 3  |
| 254 | ENSG00000108219  | tetraspanin 14                                                               | 10 |
| 183 | ENSG00000168785  | tetraspanin 5                                                                | 4  |
| 316 | ENSG00000165533  | tetratricopeptide repeat domain 8                                            | 14 |
| 231 | ENSG00000177426  | TGFB induced factor homeobox 1                                               | 18 |
| 175 | ENSG00000137492  | THAP domain containing 12                                                    | 11 |
| 4   | ENSG000000265972 | thioredoxin interacting protein                                              | 1  |
| 335 | ENSG00000137801  | thrombospondin 1                                                             | 15 |
| 128 | ENSG00000005108  | thrombospondin type 1 domain containing 7A                                   | 7  |
| 292 | ENSG00000139372  | thymine DNA glycosylase                                                      | 12 |
| 254 | ENSG00000205542  | thymosin beta 4 X-linked                                                     | X  |
| 322 | ENSG00000100815  | thyroid hormone receptor interactor 11                                       | 14 |
| 233 | ENSG00000223573  | TINCR ubiquitin domain containing                                            | 19 |
| 209 | ENSG00000185215  | TNF alpha induced protein 2                                                  | 14 |
| 115 | ENSG00000146072  | TNF receptor superfamily member 21                                           | 6  |
| 170 | ENSG00000078902  | toll interacting protein                                                     | 11 |
| 89  | ENSG00000116205  | transcription elongation factor A N-terminal and central domain containing 2 | 1  |
| 251 | ENSG00000108064  | transcription factor A, mitochondrial                                        | 10 |
| 153 | ENSG00000116830  | transcription termination factor 2                                           | 1  |
| 228 | ENSG00000141232  | transducer of ERBB2, 1                                                       | 17 |
| 35  | ENSG00000092969  | transforming growth factor beta 2                                            | 1  |
| 195 | ENSG00000120708  | transforming growth factor beta induced                                      | 5  |
| 360 | ENSG00000171928  | trans-golgi network vesicle protein 23 homolog B                             | 17 |
| 39  | ENSG00000173726  | translocase of outer mitochondrial membrane 20                               | 1  |
| 213 | ENSG00000196683  | translocase of outer mitochondrial membrane 7                                | 7  |
| 63  | ENSG00000169908  | transmembrane 4 L six family member 1                                        | 3  |
| 289 | ENSG00000057704  | transmembrane and coiled-coil domain family 3                                | 12 |
| 286 | ENSG00000139324  | transmembrane O-mannosyltransferase targeting cadherins 3                    | 12 |
| 312 | ENSG00000170348  | transmembrane p24 trafficking protein 10                                     | 14 |
| 71  | ENSG00000168936  | transmembrane protein 129, E3 ubiquitin ligase                               | 4  |
| 172 | ENSG00000006118  | transmembrane protein 132A                                                   | 11 |
| 173 | ENSG00000179292  | transmembrane protein 151A                                                   | 11 |

|     |                 |                                                               |    |
|-----|-----------------|---------------------------------------------------------------|----|
| 294 | ENSG00000151135 | transmembrane protein 263                                     | 12 |
| 183 | ENSG00000165685 | transmembrane protein 52B                                     | 12 |
| 72  | ENSG00000159596 | transmembrane protein 69                                      | 1  |
| 178 | ENSG00000137648 | transmembrane serine protease 4                               | 11 |
| 7   | ENSG00000182898 | trichohyalin like 1                                           | 1  |
| 354 | ENSG00000221926 | tripartite motif containing 16                                | 17 |
| 109 | ENSG00000204616 | tripartite motif containing 31                                | 6  |
| 147 | ENSG00000197323 | tripartite motif containing 33                                | 1  |
| 87  | ENSG00000179046 | tripartite motif family like 2                                | 4  |
| 49  | ENSG00000043514 | tRNA isopentenyltransferase 1                                 | 1  |
| 23  | ENSG00000198860 | tRNA splicing endonuclease subunit 15                         | 1  |
| 105 | ENSG00000162623 | tRNA-yW synthesizing protein 3 homolog                        | 1  |
| 156 | ENSG00000116874 | tryptophanyl tRNA synthetase 2, mitochondrial                 | 1  |
| 301 | ENSG00000102804 | TSC22 domain family member 1                                  | 13 |
| 127 | ENSG00000130338 | TUB like protein 4                                            | 6  |
| 273 | ENSG00000123416 | tubulin alpha 1b                                              | 12 |
| 42  | ENSG00000142910 | tubulointerstitial nephritis antigen like 1                   | 1  |
| 351 | ENSG00000141510 | tumor protein p53                                             | 17 |
| 272 | ENSG00000151239 | twinfilin actin binding protein 1                             | 12 |
| 317 | ENSG00000042088 | tyrosyl-DNA phosphodiesterase 1                               | 14 |
| 75  | ENSG00000173660 | ubiquinol-cytochrome c reductase hinge protein                | 1  |
| 342 | ENSG00000132388 | ubiquitin conjugating enzyme E2 G1                            | 17 |
| 339 | ENSG00000103353 | ubiquitin family domain containing 1                          | 16 |
| 240 | ENSG00000147854 | ubiquitin like with PHD and ring finger domains 2             | 9  |
| 327 | ENSG00000012963 | ubiquitin protein ligase E3 component n-recognin 7            | 14 |
| 95  | ENSG00000162607 | ubiquitin specific peptidase 1                                | 1  |
| 110 | ENSG00000077254 | ubiquitin specific peptidase 33                               | 1  |
| 237 | ENSG00000179913 | UDP-GlcNAc:betaGal beta-1,3-N-acetylglucosaminyltransferase 3 | 19 |
| 165 | ENSG00000197355 | UDP-N-acetylglucosamine pyrophosphorylase 1 like 1            | 9  |
| 338 | ENSG00000140553 | unc-45 myosin chaperone A                                     | 15 |
| 54  | ENSG00000144455 | uncharacterized LOC100130207                                  | 3  |
| 144 | ENSG00000237807 | uncharacterized LOC100507516                                  | 8  |
| 116 | ENSG00000231683 | uncharacterized LOC101927136                                  | 6  |
| 381 | ENSG00000267575 | uncharacterized LOC101927151                                  | 19 |
| 225 | ENSG00000105793 | uncharacterized LOC101927446                                  | 7  |
| 46  | ENSG00000286081 | uncharacterized LOC105373682                                  | 2  |
| 49  | ENSG00000233654 | uncharacterized LOC105376748                                  | 2  |
| 65  | ENSG00000126088 | uroporphyrinogen decarboxylase                                | 1  |
| 174 | ENSG00000198382 | UV radiation resistance associated                            | 11 |
| 150 | ENSG00000173218 | VANGL planar cell polarity protein 1                          | 1  |
| 130 | ENSG00000134215 | vav guanine nucleotide exchange factor 3                      | 1  |
| 64  | ENSG00000197415 | ventricular zone expressed PH domain containing 1             | 3  |
| 226 | ENSG00000108828 | vesicle amine transport 1                                     | 17 |
| 8   | ENSG00000049245 | vesicle associated membrane protein 3                         | 1  |
| 263 | ENSG00000102243 | vestigial like family member 1                                | X  |
| 232 | ENSG00000078668 | voltage dependent anion channel 3                             | 8  |
| 334 | ENSG00000100749 | VRK serine/threonine kinase 1                                 | 14 |
| 157 | ENSG00000231365 | WARS2 antisense RNA 1                                         | 1  |
| 33  | ENSG00000158195 | WASP family member 2                                          | 1  |
| 191 | ENSG00000176871 | WD repeat and SOCS box containing 2                           | 12 |
| 177 | ENSG00000138442 | WD repeat domain 12                                           | 2  |
| 155 | ENSG00000065183 | WD repeat domain 3                                            | 1  |
| 140 | ENSG00000116455 | WD repeat domain 77                                           | 1  |
| 38  | ENSG00000143816 | Wnt family member 9A                                          | 1  |
| 54  | ENSG00000065978 | Y-box binding protein 1                                       | 1  |
| 259 | ENSG00000181704 | Yip1 domain family member 6                                   | X  |
| 222 | ENSG00000184939 | ZFP90 zinc finger protein                                     | 16 |
| 229 | ENSG00000105939 | zinc finger CCCH-type containing, antiviral 1                 | 7  |
| 117 | ENSG00000117174 | zinc finger HIT-type containing 6                             | 1  |
| 107 | ENSG00000197279 | zinc finger protein 165                                       | 6  |
| 244 | ENSG00000171940 | zinc finger protein 217                                       | 20 |
| 155 | ENSG00000196922 | zinc finger protein 252, pseudogene                           | 8  |
| 300 | ENSG00000090612 | zinc finger protein 268                                       | 12 |

|                |                 |                                      |    |
|----------------|-----------------|--------------------------------------|----|
| 118            | ENSG00000188994 | zinc finger protein 292              | 6  |
| 248            | ENSG00000265763 | zinc finger protein 488              | 10 |
| 119            | ENSG00000122482 | zinc finger protein 644              | 1  |
| 6              | ENSG00000143373 | zinc finger protein 687              | 1  |
| 158            | ENSG00000143067 | zinc finger protein 697              | 1  |
| 145            | ENSG00000164684 | zinc finger protein 704              | 8  |
| 134            | ENSG00000048405 | zinc finger protein 800              | 7  |
| 168            | ENSG00000215146 | zinc finger protein 91 pseudogene    | 10 |
| 239            | ENSG00000184635 | zinc finger protein 93               | 19 |
| 109            | ENSG00000036549 | zinc finger ZZ-type containing 3     | 1  |
| 51             | ENSG00000084073 | zinc metalloproteinase STE24         | 1  |
| 250            | ENSG00000122952 | ZW10 interacting kinetochore protein | 10 |
| Upregulated    |                 |                                      |    |
| Downregulated: |                 |                                      |    |

**Table S5.** Deregulated genes resulting from RNA-seq in the CCL-138-R cell line compared to the parental line (CCL-138). A total of 68 downregulated genes and 154 upregulated genes were found. Green indicates downregulated genes and orange indicates upregulated genes.

| Sample No. | Gene Code       | Gene name                                                                | Chromosome |
|------------|-----------------|--------------------------------------------------------------------------|------------|
| 102        | ENSG00000089127 | 2'-5'-oligoadenylate synthetase 1                                        | 12         |
| 104        | ENSG00000111335 | 2'-5'-oligoadenylate synthetase 2                                        | 12         |
| 103        | ENSG00000111331 | 2'-5'-oligoadenylate synthetase 3                                        | 12         |
| 105        | ENSG00000135114 | 2'-5'-oligoadenylate synthetase like                                     | 12         |
| 63         | ENSG00000140350 | acidic nuclear phosphoprotein 32 family member A                         | 15         |
| 42         | ENSG00000169067 | actin beta like 2                                                        | 5          |
| 58         | ENSG00000153294 | adhesion G protein-coupled receptor F4                                   | 6          |
| 18         | ENSG00000071073 | alpha-1,3-mannosyl-glycoprotein 4-beta-N-acetylglucosaminyltransferase A | 2          |
| 125        | ENSG00000141279 | aminopeptidase puromycin sensitive                                       | 17         |
| 92         | ENSG00000166016 | ankyrin repeat and BTB domain containing 2                               | 11         |
| 135        | ENSG00000130203 | apolipoprotein E                                                         | 19         |
| 149        | ENSG00000100342 | apolipoprotein L1                                                        | 22         |
| 12         | ENSG00000180801 | arylsulfatase family member J                                            | 4          |
| 4          | ENSG00000066279 | assembly factor for spindle microtubules                                 | 1          |
| 66         | ENSG00000152234 | ATP synthase F1 subunit alpha                                            | 18         |
| 24         | ENSG00000144476 | atypical chemokine receptor 3                                            | 2          |
| 97         | ENSG00000023445 | baculoviral IAP repeat containing 3                                      | 11         |
| 95         | ENSG00000168062 | basic leucine zipper ATF-like transcription factor 2                     | 11         |
| 71         | ENSG00000172331 | bisphosphoglycerate mutase                                               | 7          |
| 134        | ENSG00000130303 | bone marrow stromal cell antigen 2                                       | 19         |
| 136        | ENSG00000125845 | bone morphogenetic protein 2                                             | 20         |
| 141        | ENSG00000064787 | brain enriched myelin associated protein 1                               | 20         |
| 56         | ENSG00000060982 | branched chain amino acid transaminase 1                                 | 12         |
| 16         | ENSG00000113361 | cadherin 6                                                               | 5          |
| 41         | ENSG00000151882 | C-C motif chemokine ligand 28                                            | 5          |
| 60         | ENSG00000272398 | CD24 molecule                                                            | 6          |
| 45         | ENSG00000019582 | CD74 molecule                                                            | 5          |
| 1          | ENSG00000117399 | cell division cycle 20                                                   | 1          |
| 5          | ENSG00000117724 | centromere protein F                                                     | 1          |
| 58         | ENSG00000151849 | centromere protein J                                                     | 13         |
| 15         | ENSG00000150753 | chaperonin containing TCP1 subunit 5                                     | 5          |
| 154        | ENSG00000155962 | chloride intracellular channel 2                                         | X          |
| 57         | ENSG00000112782 | chloride intracellular channel 5                                         | 6          |
| 54         | ENSG00000243649 | complement factor B                                                      | 6          |

|     |                 |                                                                            |     |
|-----|-----------------|----------------------------------------------------------------------------|-----|
| 80  | ENSG00000048740 | CUGBP Elav-like family member 2                                            | 10  |
| 34  | ENSG00000169245 | C-X-C motif chemokine ligand 10                                            | 4   |
| 35  | ENSG00000169248 | C-X-C motif chemokine ligand 11                                            | 4   |
| 18  | ENSG00000134057 | cyclin B1                                                                  | 5   |
| 13  | ENSG00000134326 | cytidine/uridine monophosphate kinase 2                                    | 2   |
| 52  | ENSG00000006634 | DBF4 zinc finger                                                           | 7   |
| 39  | ENSG00000181381 | DExD/H-box 60 like                                                         | 4   |
| 38  | ENSG00000137628 | DExD/H-box helicase 60                                                     | 4   |
| 37  | ENSG00000070190 | dual adaptor of phosphotyrosine and 3-phosphoinositides 1                  | 4   |
| 12  | ENSG00000143507 | dual specificity phosphatase 10                                            | 1   |
| 7   | ENSG00000115380 | EGF containing fibulin extracellular matrix protein 1                      | 2   |
| 111 | ENSG00000129521 | egl-9 family hypoxia inducible factor 3                                    | 14  |
| 47  | ENSG00000078401 | endothelin 1                                                               | 6   |
| 16  | ENSG00000055332 | eukaryotic translation initiation factor 2 alpha kinase 2                  | 2   |
| 23  | ENSG00000115414 | fibronectin 1                                                              | 2   |
| 113 | ENSG00000185070 | fibronectin leucine rich transmembrane protein 2                           | 14  |
| 137 | ENSG00000125848 | fibronectin leucine rich transmembrane protein 3                           | 20  |
| 40  | ENSG00000082074 | FYN binding protein 1                                                      | 5   |
| 130 | ENSG00000108679 | galectin 3 binding protein                                                 | 17  |
|     | ENSEMBL         | GENENAME                                                                   | CHR |
|     | ENSEMBL         | GENENAME                                                                   | CHR |
| 54  | ENSG00000148672 | glutamate dehydrogenase 1                                                  | 10  |
| 43  | ENSG00000173221 | glutaredoxin                                                               | 5   |
| 65  | ENSG00000136235 | glycoprotein nmb                                                           | 7   |
| 124 | ENSG00000030582 | granulin precursor                                                         | 17  |
| 8   | ENSG00000117228 | guanylate binding protein 1                                                | 1   |
| 26  | ENSG00000187837 | H1.2 linker histone, cluster member                                        | 6   |
| 32  | ENSG00000124575 | H1.3 linker histone, cluster member                                        | 6   |
| 28  | ENSG00000168298 | H1.4 linker histone, cluster member                                        | 6   |
| 48  | ENSG00000184357 | H1.5 linker histone, cluster member                                        | 6   |
| 38  | ENSG00000196787 | H2A clustered histone 11                                                   | 6   |
| 40  | ENSG00000274997 | H2A clustered histone 12                                                   | 6   |
| 42  | ENSG00000196747 | H2A clustered histone 13                                                   | 6   |
| 44  | ENSG00000276368 | H2A clustered histone 14                                                   | 6   |
| 23  | ENSG00000278463 | H2A clustered histone 4                                                    | 6   |
| 31  | ENSG00000277075 | H2A clustered histone 8                                                    | 6   |
| 36  | ENSG00000278588 | H2B clustered histone 10                                                   | 6   |
| 37  | ENSG00000124635 | H2B clustered histone 11                                                   | 6   |
| 41  | ENSG00000185130 | H2B clustered histone 13                                                   | 6   |
| 45  | ENSG00000273703 | H2B clustered histone 14                                                   | 6   |
| 3   | ENSG00000203814 | H2B clustered histone 18                                                   | 1   |
| 24  | ENSG00000276410 | H2B clustered histone 3                                                    | 6   |
| 29  | ENSG00000274290 | H2B clustered histone 6                                                    | 6   |
| 34  | ENSG00000275713 | H2B clustered histone 9                                                    | 6   |
| 19  | ENSG00000275714 | H3 clustered histone 1                                                     | 6   |
| 43  | ENSG00000278828 | H3 clustered histone 10                                                    | 6   |
| 49  | ENSG00000275379 | H3 clustered histone 11                                                    | 6   |
| 50  | ENSG00000197153 | H3 clustered histone 12                                                    | 6   |
| 22  | ENSG00000286522 | H3 clustered histone 2                                                     | 6   |
| 25  | ENSG00000287080 | H3 clustered histone 3                                                     | 6   |
| 33  | ENSG00000277775 | H3 clustered histone 7                                                     | 6   |
| 35  | ENSG00000273983 | H3 clustered histone 8                                                     | 6   |
| 20  | ENSG00000278637 | H4 clustered histone 1                                                     | 6   |
| 46  | ENSG00000197238 | H4 clustered histone 11                                                    | 6   |
| 47  | ENSG00000273542 | H4 clustered histone 12                                                    | 6   |
| 21  | ENSG00000278705 | H4 clustered histone 2                                                     | 6   |
| 27  | ENSG00000197061 | H4 clustered histone 3                                                     | 6   |
| 30  | ENSG00000277157 | H4 clustered histone 4                                                     | 6   |
| 39  | ENSG00000276180 | H4 clustered histone 9                                                     | 6   |
| 36  | ENSG00000138642 | HECT and RLD domain containing E3 ubiquitin protein ligase family member 6 | 4   |
| 143 | ENSG00000130589 | helicase with zinc finger 2                                                | 20  |
| 133 | ENSG00000196684 | hematopoietic SH2 domain containing                                        | 19  |
| 60  | ENSG00000189403 | high mobility group box 1                                                  | 13  |

|     |                 |                                                                   |    |
|-----|-----------------|-------------------------------------------------------------------|----|
| 53  | ENSG00000206337 | HLA complex P5                                                    | 6  |
| 119 | ENSG00000086696 | hydroxysteroid 17-beta dehydrogenase 2                            | 16 |
| 66  | ENSG00000146674 | insulin like growth factor binding protein 3                      | 7  |
| 132 | ENSG00000090339 | intercellular adhesion molecule 1                                 | 19 |
| 114 | ENSG00000165949 | interferon alpha inducible protein 27                             | 14 |
| 2   | ENSG00000126709 | interferon alpha inducible protein 6                              | 1  |
| 62  | ENSG00000027697 | interferon gamma receptor 1                                       | 6  |
| 123 | ENSG00000068079 | interferon induced protein 35                                     | 17 |
| 7   | ENSG00000137965 | interferon induced protein 44                                     | 1  |
| 6   | ENSG00000137959 | interferon induced protein 44 like                                | 1  |
| 84  | ENSG00000185745 | interferon induced protein with tetratricopeptide repeats 1       | 10 |
| 82  | ENSG00000119922 | interferon induced protein with tetratricopeptide repeats 2       | 10 |
| 83  | ENSG00000119917 | interferon induced protein with tetratricopeptide repeats 3       | 10 |
| 85  | ENSG00000152778 | interferon induced protein with tetratricopeptide repeats 5       | 10 |
| 86  | ENSG00000185885 | interferon induced transmembrane protein 1                        | 11 |
| 87  | ENSG00000142089 | interferon induced transmembrane protein 3                        | 11 |
| 21  | ENSG00000115267 | interferon induced with helicase C domain 1                       | 2  |
| 88  | ENSG00000185507 | interferon regulatory factor 7                                    | 11 |
| 115 | ENSG00000172183 | interferon stimulated exonuclease gene 20                         | 15 |
| 19  | ENSG00000125538 | interleukin 1 beta                                                | 2  |
| 30  | ENSG00000174564 | interleukin 20 receptor subunit beta                              | 3  |
| 1   | ENSG00000187608 | ISG15 ubiquitin like modifier                                     | 1  |
| 151 | ENSG00000130487 | kelch domain containing 7B                                        | 22 |
| 122 | ENSG00000186832 | keratin 16                                                        | 17 |
| 121 | ENSG00000108244 | keratin 23                                                        | 17 |
| 57  | ENSG00000186081 | keratin 5                                                         | 12 |
| 79  | ENSG00000067082 | Kruppel like factor 6                                             | 10 |
| 147 | ENSG00000128342 | LIF interleukin 6 family cytokine                                 | 22 |
| 6   | ENSG00000118961 | lipid droplet associated hydrolase                                | 2  |
| 32  | ENSG00000078081 | lysosomal associated membrane protein 3                           | 3  |
| 52  | ENSG00000234745 | major histocompatibility complex, class I, B                      | 6  |
| 51  | ENSG00000204525 | major histocompatibility complex, class I, C                      | 6  |
| 50  | ENSG00000204592 | major histocompatibility complex, class I, E                      | 6  |
| 49  | ENSG00000204642 | major histocompatibility complex, class I, F                      | 6  |
| 56  | ENSG00000231389 | major histocompatibility complex, class II, DP alpha 1            | 6  |
| 98  | ENSG00000137673 | matrix metalloproteinase 7                                        | 11 |
| 144 | ENSG00000157601 | MX dynamin like GTPase 1                                          | 21 |
| 96  | ENSG00000172927 | myeloma overexpressed                                             | 11 |
| 46  | ENSG00000260604 | NA                                                                | NA |
| 62  | ENSG00000224078 | NA                                                                | NA |
| 64  | ENSG00000259781 | NA                                                                | NA |
| 108 | ENSG00000165795 | NDRG family member 2                                              | 14 |
| 17  | ENSG00000163121 | neuralized E3 ubiquitin protein ligase 3                          | 2  |
| 25  | ENSG00000204099 | neuraminidase 4                                                   | 2  |
| 118 | ENSG00000140853 | NLR family CARD domain containing 5                               | 16 |
| 150 | ENSG00000177989 | outer dense fiber of sperm tails 3B                               | 22 |
| 5   | ENSG00000162366 | PDZK1 interacting protein 1                                       | 1  |
| 93  | ENSG00000149090 | peptidase domain containing associated with muscle regeneration 1 | 11 |
| 139 | ENSG00000124102 | peptidase inhibitor 3                                             | 20 |
| 31  | ENSG00000188313 | phospholipid scramblase 1                                         | 3  |
| 81  | ENSG00000122861 | plasminogen activator, urokinase                                  | 10 |
| 72  | ENSG00000059378 | poly(ADP-ribose) polymerase family member 12                      | 7  |
| 29  | ENSG00000173193 | poly(ADP-ribose) polymerase family member 14                      | 3  |
| 28  | ENSG00000138496 | poly(ADP-ribose) polymerase family member 9                       | 3  |
| 107 | ENSG00000178695 | potassium channel tetramerization domain containing 12            | 13 |
| 127 | ENSG00000167183 | proline rich 15 like                                              | 17 |
| 78  | ENSG00000148344 | prostaglandin E synthase                                          | 9  |
| 74  | ENSG00000167653 | prostate stem cell antigen                                        | 8  |
| 53  | ENSG00000106278 | protein tyrosine phosphatase receptor type Z1                     | 7  |
| 106 | ENSG00000184226 | protocadherin 9                                                   | 13 |
| 117 | ENSG00000103485 | quinolinate phosphoribosyltransferase                             | 16 |
| 14  | ENSG00000134321 | radical S-adenosyl methionine domain containing 2                 | 2  |
| 15  | ENSG00000152689 | RAS guanyl releasing protein 3                                    | 2  |



|     |                 |                                                                                 |    |
|-----|-----------------|---------------------------------------------------------------------------------|----|
| 33  | ENSG00000136514 | receptor transporter protein 4                                                  | 3  |
| 69  | ENSG00000189056 | reelin                                                                          | 7  |
| 101 | ENSG00000139547 | retinol dehydrogenase 16                                                        | 12 |
| 109 | ENSG00000165799 | ribonuclease A family member 7                                                  | 14 |
| 59  | ENSG00000122026 | ribosomal protein L21                                                           | 13 |
| 9   | ENSG00000168028 | ribosomal protein SA                                                            | 3  |
| 11  | ENSG00000143556 | S100 calcium binding protein A7                                                 | 1  |
| 138 | ENSG00000101347 | SAM and HD domain containing deoxynucleoside triphosphate triphosphohydrolase 1 | 20 |
| 65  | ENSG00000172123 | schlafen family member 12                                                       | 17 |
| 51  | ENSG00000170381 | semaphorin 3E                                                                   | 7  |
| 112 | ENSG00000165389 | serine palmitoyltransferase small subunit A                                     | 14 |
| 131 | ENSG00000197632 | serpin family B member 2                                                        | 18 |
| 91  | ENSG00000173432 | serum amyloid A1                                                                | 11 |
| 90  | ENSG00000134339 | serum amyloid A2                                                                | 11 |
| 61  | ENSG00000118515 | serum/glucocorticoid regulated kinase 1                                         | 6  |
| 2   | ENSG00000031698 | seryl-tRNA synthetase 1                                                         | 1  |
| 44  | ENSG00000169247 | SH3 domain and tetratricopeptide repeats 2                                      | 5  |
| 26  | ENSG00000164054 | shisa family member 5                                                           | 3  |
| 22  | ENSG00000115415 | signal transducer and activator of transcription 1                              | 2  |
| 100 | ENSG00000170581 | signal transducer and activator of transcription 2                              | 12 |
| 10  | ENSG00000241794 | small proline rich protein 2A                                                   | 1  |
| 9   | ENSG00000163216 | small proline rich protein 2D                                                   | 1  |
| 61  | ENSG00000102743 | solute carrier family 25 member 15                                              | 13 |
| 73  | ENSG00000147606 | solute carrier family 26 member 7                                               | 8  |
| 126 | ENSG00000189120 | Sp6 transcription factor                                                        | 17 |
| 67  | ENSG00000161888 | SPC24 component of NDC80 kinetochore complex                                    | 19 |
| 128 | ENSG00000008294 | sperm associated antigen 9                                                      | 17 |
| 152 | ENSG00000130066 | spermidine/spermine N1-acetyltransferase 1                                      | X  |
| 10  | ENSG00000181449 | SRY-box transcription factor 2                                                  | 3  |
| 48  | ENSG00000124766 | SRY-box transcription factor 4                                                  | 6  |
| 67  | ENSG00000205413 | sterile alpha motif domain containing 9                                         | 7  |
| 68  | ENSG00000177409 | sterile alpha motif domain containing 9 like                                    | 7  |
| 55  | ENSG00000149136 | structure specific recognition protein 1                                        | 11 |
| 64  | ENSG00000112096 | superoxide dismutase 2                                                          | 6  |
| 8   | ENSG00000173705 | sushi domain containing 5                                                       | 3  |
| 3   | ENSG00000162512 | syndecan 3                                                                      | 1  |
| 77  | ENSG00000041982 | tenascin C                                                                      | 9  |
| 59  | ENSG00000112773 | terminal nucleotidyltransferase 5A                                              | 6  |
| 17  | ENSG00000113407 | threonyl-tRNA synthetase 1                                                      | 5  |
| 14  | ENSG00000071539 | thyroid hormone receptor interactor 13                                          | 5  |
| 129 | ENSG00000035862 | TIMP metalloproteinase inhibitor 2                                              | 17 |
| 148 | ENSG00000100234 | TIMP metalloproteinase inhibitor 3                                              | 22 |
| 63  | ENSG00000118503 | TNF alpha induced protein 3                                                     | 6  |
| 76  | ENSG00000181634 | TNF superfamily member 15                                                       | 9  |
| 70  | ENSG00000105967 | transcription factor EC                                                         | 7  |
| 13  | ENSG00000170006 | transmembrane protein 154                                                       | 4  |
| 11  | ENSG00000121895 | transmembrane protein 156                                                       | 4  |
| 153 | ENSG00000147027 | transmembrane protein 47                                                        | X  |
| 145 | ENSG00000184012 | transmembrane serine protease 2                                                 | 21 |
| 55  | ENSG00000168394 | transporter 1, ATP binding cassette subfamily B member                          | 6  |
| 89  | ENSG00000132274 | tripartite motif containing 22                                                  | 11 |
| 99  | ENSG00000167552 | tubulin alpha 1a                                                                | 12 |
| 75  | ENSG00000196116 | tudor domain containing 7                                                       | 9  |
| 94  | ENSG00000156587 | ubiquitin conjugating enzyme E2 L6                                              | 11 |
| 27  | ENSG00000182179 | ubiquitin like modifier activating enzyme 7                                     | 3  |
| 146 | ENSG00000184979 | ubiquitin specific peptidase 18                                                 | 22 |
| 110 | ENSG00000251002 | uncharacterized LOC105370401                                                    | 14 |
| 20  | ENSG00000286081 | uncharacterized LOC105373682                                                    | 2  |
| 120 | ENSG00000132530 | XIAP associated factor 1                                                        | 17 |
| 142 | ENSG00000124256 | Z-DNA binding protein 1                                                         | 20 |
| 4   | ENSG00000163874 | zinc finger CCCH-type containing 12A                                            | 1  |
| 140 | ENSG00000124201 | zinc finger NFX1-type containing 1                                              | 20 |
| 116 | ENSG00000162078 | zymogen granule protein 16B                                                     | 16 |



**Table S6.** Deregulated proteins in HTB-43-R cells versus parental cells (HTB-43).

Adjusted *p*-values and *p*-values are indicated. Fold change (FC) values are indicated.

Negative numbers correspond to deregulated proteins and positive numbers to positive proteins.

| Swiss-Prot ID | Protein name                                                                                      | p        | p (Corr) | Regulation | FC Resistant vs Parental cells |
|---------------|---------------------------------------------------------------------------------------------------|----------|----------|------------|--------------------------------|
| P30041        | Peroxiredoxin-6 OS=Homo sapiens GN=PRDX6 PE=1 SV=3 - [PRDX6_HUMAN]                                | 6.39E-05 | 1.78E-03 | up         | 1.6062549                      |
| P23528        | Cofilin-1 OS=Homo sapiens GN=CFL1 PE=1 SV=3 - [COF1_HUMAN]                                        | 3.79E-03 | 1.48E-02 | down       | -1.2341194                     |
| P68104        | Elongation factor 1-alpha 1 OS=Homo sapiens GN=EEF1A1 PE=1 SV=1 - [EF1A1_HUMAN]                   | 1.88E-02 | 4.43E-02 | down       | -1.2412293                     |
| P60174        | Triosephosphate isomerase OS=Homo sapiens GN=TP1 PE=1 SV=3 - [TP1_HUMAN]                          | 2.00E-02 | 4.65E-02 | up         | 1.1414198                      |
| Q06830        | Peroxiredoxin-1 OS=Homo sapiens GN=PRDX1 PE=1 SV=1 - [PRDX1_HUMAN]                                | 2.69E-04 | 3.18E-03 | down       | -1.4436241                     |
| P62937        | Peptidyl-prolyl cis-trans isomerase A OS=Homo sapiens GN=PPIA PE=1 SV=2 - [PPIA_HUMAN]            | 2.92E-03 | 1.27E-02 | down       | -1.2447767                     |
| P04792        | Heat shock protein beta-1 OS=Homo sapiens GN=HSPB1 PE=1 SV=2 - [HSPB1_HUMAN]                      | 4.59E-04 | 4.06E-03 | up         | 1.5795714                      |
| P00558        | Phosphoglycerate kinase 1 OS=Homo sapiens GN=PGK1 PE=1 SV=3 - [PGK1_HUMAN]                        | 1.81E-05 | 1.36E-03 | up         | 1.3082011                      |
| P35232        | Prohibitin OS=Homo sapiens GN=PHB PE=1 SV=1 - [PHB_HUMAN]                                         | 7.32E-03 | 2.27E-02 | up         | 1.1551746                      |
| P09211        | Glutathione S-transferase P OS=Homo sapiens GN=GSTP1 PE=1 SV=2 - [GSTP1_HUMAN]                    | 1.70E-03 | 8.55E-03 | up         | 1.276601                       |
| P37108        | Signal recognition particle 14 kDa protein OS=Homo sapiens GN=SRP14 PE=1 SV=2 - [SRP14_HUMAN]     | 1.71E-02 | 4.12E-02 | up         | 1.1334251                      |
| Q99623        | Prohibitin-2 OS=Homo sapiens GN=PHB2 PE=1 SV=2 - [PHB2_HUMAN]                                     | 9.38E-04 | 6.11E-03 | up         | 1.202131                       |
| P07437        | Tubulin beta chain OS=Homo sapiens GN=TUBB PE=1 SV=2 - [TUBB5_HUMAN]                              | 1.44E-02 | 3.66E-02 | down       | -1.3822523                     |
| P09382        | Galectin-1 OS=Homo sapiens GN=LGALS1 PE=1 SV=2 - [LEG1_HUMAN]                                     | 5.37E-03 | 1.87E-02 | down       | -2.1661763                     |
| P15559        | NAD(P)H dehydrogenase [quinone] 1 OS=Homo sapiens GN=NQO1 PE=1 SV=1 - [NQO1_HUMAN]                | 4.90E-04 | 4.30E-03 | up         | 1.6138847                      |
| P06733        | Alpha-enolase OS=Homo sapiens GN=ENO1 PE=1 SV=2 - [ENO1_HUMAN]                                    | 7.00E-03 | 2.22E-02 | down       | -1.5024956                     |
| P00492        | Hypoxanthine-guanine phosphoribosyltransferase OS=Homo sapiens GN=HPRT1 PE=1 SV=2 - [HPRT1_HUMAN] | 6.43E-03 | 2.09E-02 | up         | 1.1258961                      |
| P60842        | Eukaryotic initiation factor 4A-I OS=Homo sapiens GN=EIF4A1 PE=1 SV=1 - [EIF4A1_HUMAN]            | 5.87E-05 | 1.78E-03 | down       | -1.4718035                     |
| P30050        | 60S ribosomal protein L12 OS=Homo sapiens GN=RPL12 PE=1 SV=1 - [RPL12_HUMAN]                      | 1.51E-03 | 8.02E-03 | down       | -1.1765697                     |
| P31946        | 14-3-3 protein beta/alpha OS=Homo sapiens GN=YWHAB PE=1 SV=3 - [1433B_HUMAN]                      | 1.64E-03 | 8.36E-03 | up         | 1.2718947                      |
| P18124        | 60S ribosomal protein L7 OS=Homo sapiens GN=RPL7 PE=1 SV=1 - [RPL7_HUMAN]                         | 4.76E-03 | 1.70E-02 | down       | -1.1101823                     |
| P31947        | 14-3-3 protein sigma OS=Homo sapiens GN=SFN PE=1 SV=1 - [1433S_HUMAN]                             | 1.25E-04 | 2.21E-03 | down       | -2.0151713                     |
| P23284        | Peptidyl-prolyl cis-trans isomerase B OS=Homo sapiens GN=PPIB PE=1 SV=2 - [PPIB_HUMAN]            | 3.77E-04 | 3.62E-03 | up         | 1.3232296                      |
| P00338        | L-lactate dehydrogenase A chain OS=Homo sapiens GN=LDHA PE=1 SV=2 - [LDHA_HUMAN]                  | 1.39E-03 | 7.57E-03 | down       | -1.2208092                     |

|        |                                                                                                        |          |          |      |            |
|--------|--------------------------------------------------------------------------------------------------------|----------|----------|------|------------|
| Q14019 | Coactosin-like protein OS=Homo sapiens GN=COTL1 PE=1 SV=3 - [COTL1_HUMAN]                              | 7.24E-03 | 2.25E-02 | up   | 1.5707432  |
| P62258 | 14-3-3 protein epsilon OS=Homo sapiens GN=YWHAE PE=1 SV=1 - [1433E_HUMAN]                              | 1.52E-02 | 3.80E-02 | down | -1.1411275 |
| P23396 | 40S ribosomal protein S3 OS=Homo sapiens GN=RPS3 PE=1 SV=2 - [RS3_HUMAN]                               | 6.81E-03 | 2.18E-02 | down | -1.1796442 |
| P07195 | L-lactate dehydrogenase B chain OS=Homo sapiens GN=LDHB PE=1 SV=2 - [LDHB_HUMAN]                       | 6.82E-05 | 1.84E-03 | up   | 1.232984   |
| Q99714 | 3-hydroxyacyl-CoA dehydrogenase type-2 OS=Homo sapiens GN=HSD17B10 PE=1 SV=3 - [HCD2_HUMAN]            | 4.16E-03 | 1.58E-02 | up   | 1.1669333  |
| P07900 | Heat shock protein HSP 90-alpha OS=Homo sapiens GN=HSP90AA1 PE=1 SV=5 - [HS90A_HUMAN]                  | 3.92E-03 | 1.51E-02 | up   | 1.1636283  |
| P08238 | Heat shock protein HSP 90-beta OS=Homo sapiens GN=HSP90AB1 PE=1 SV=4 - [HS90B_HUMAN]                   | 8.96E-05 | 1.93E-03 | down | -1.5619411 |
| P07737 | Profilin-1 OS=Homo sapiens GN=PFN1 PE=1 SV=2 - [PROF1_HUMAN]                                           | 7.13E-04 | 5.30E-03 | down | -1.6706427 |
| Q13885 | Tubulin beta-2A chain OS=Homo sapiens GN=TUBB2A PE=1 SV=1 - [TBB2A_HUMAN]                              | 6.21E-03 | 2.06E-02 | down | -1.7487133 |
| Q9BQE3 | Tubulin alpha-1C chain OS=Homo sapiens GN=TUBA1C PE=1 SV=1 - [TBA1C_HUMAN]                             | 1.30E-02 | 3.41E-02 | down | -1.1826854 |
| P11142 | Heat shock cognate 71 kDa protein OS=Homo sapiens GN=HSPA8 PE=1 SV=1 - [HSP7C_HUMAN]                   | 4.12E-03 | 1.57E-02 | down | -1.1618044 |
| P62701 | 40S ribosomal protein S4, X isoform OS=Homo sapiens GN=RPS4X PE=1 SV=2 - [RS4X_HUMAN]                  | 3.69E-03 | 1.46E-02 | down | -1.2036382 |
| P07355 | Annexin A2 OS=Homo sapiens GN=ANXA2 PE=1 SV=2 - [ANXA2_HUMAN]                                          | 1.65E-02 | 4.03E-02 | down | -1.108626  |
| Q99497 | Protein DJ-1 OS=Homo sapiens GN= PARK7 PE=1 SV=2 - [PARK7_HUMAN]                                       | 1.23E-03 | 7.10E-03 | down | -1.3677577 |
| P00505 | Aspartate aminotransferase, mitochondrial OS=Homo sapiens GN=GOT2 PE=1 SV=3 - [AATM_HUMAN]             | 9.53E-05 | 1.99E-03 | up   | 1.4605905  |
| P63244 | Receptor of activated protein C kinase 1 OS=Homo sapiens GN=RACK1 PE=1 SV=3 - [RACK1_HUMAN]            | 3.52E-04 | 3.58E-03 | down | -1.1869397 |
| P31949 | Protein S100-A11 OS=Homo sapiens GN=S100A11 PE=1 SV=2 - [S10AB_HUMAN]                                  | 1.27E-02 | 3.35E-02 | up   | 1.3337348  |
| P30086 | Phosphatidylethanolamine-binding protein 1 OS=Homo sapiens GN=PEBP1 PE=1 SV=3 - [PEBP1_HUMAN]          | 1.65E-04 | 2.44E-03 | up   | 1.3983476  |
| P51148 | Ras-related protein Rab-5C OS=Homo sapiens GN=RAB5C PE=1 SV=2 - [RAB5C_HUMAN]                          | 1.90E-04 | 2.68E-03 | up   | 1.3729767  |
| P22392 | Nucleoside diphosphate kinase B OS=Homo sapiens GN=NME2 PE=1 SV=1 - [NDKB_HUMAN]                       | 8.64E-04 | 5.87E-03 | up   | 1.4499636  |
| P0DMV8 | Heat shock 70 kDa protein 1A OS=Homo sapiens GN=HSPA1A PE=1 SV=1 - [HS71A_HUMAN]                       | 8.40E-05 | 1.93E-03 | up   | 1.3490398  |
| P13639 | Elongation factor 2 OS=Homo sapiens GN=EEF2 PE=1 SV=4 - [EF2_HUMAN]                                    | 3.11E-04 | 3.39E-03 | down | -1.2252377 |
| P50454 | Serpin H1 OS=Homo sapiens GN=SERPINH1 PE=1 SV=2 - [SERPH_HUMAN]                                        | 1.10E-04 | 2.10E-03 | down | -1.416099  |
| P24534 | Elongation factor 1-beta OS=Homo sapiens GN=EEF1B2 PE=1 SV=3 - [EF1B_HUMAN]                            | 6.69E-03 | 2.15E-02 | down | -1.2675023 |
| Q9HB71 | Calcyclin-binding protein OS=Homo sapiens GN=CACYBP PE=1 SV=2 - [CYBP_HUMAN]                           | 1.81E-03 | 8.88E-03 | up   | 1.2186345  |
| O43707 | Alpha-actinin-4 OS=Homo sapiens GN=ACTN4 PE=1 SV=2 - [ACTN4_HUMAN]                                     | 3.61E-03 | 1.44E-02 | up   | 1.1556438  |
| P68366 | Tubulin alpha-4A chain OS=Homo sapiens GN=TUBA4A PE=1 SV=1 - [TBA4A_HUMAN]                             | 5.78E-05 | 1.78E-03 | down | -1.2423459 |
| Q9Y277 | Voltage-dependent anion-selective channel protein 3 OS=Homo sapiens GN=VDAC3 PE=1 SV=1 - [VDAC3_HUMAN] | 2.92E-04 | 3.28E-03 | down | -1.5041708 |
| O75874 | Isocitrate dehydrogenase [NADP] cytoplasmic OS=Homo sapiens GN=IDH1 PE=1 SV=2 - [IDHC_HUMAN]           | 2.38E-06 | 8.34E-04 | up   | 1.7515198  |
| P29692 | Elongation factor 1-delta OS=Homo sapiens GN=EEF1D PE=1 SV=5 - [EF1D_HUMAN]                            | 5.81E-03 | 1.98E-02 | down | -1.1551785 |
| Q96KP4 | Cytosolic non-specific dipeptidase OS=Homo sapiens GN=CNDP2 PE=1 SV=2 - [CNDP2_HUMAN]                  | 1.35E-04 | 2.34E-03 | up   | 1.2593963  |
| P51149 | Ras-related protein Rab-7a OS=Homo sapiens GN=RAB7A PE=1 SV=1 - [RAB7A_HUMAN]                          | 1.59E-03 | 8.29E-03 | up   | 1.430655   |
| Q15181 | Inorganic pyrophosphatase OS=Homo sapiens GN=PPA1 PE=1 SV=2 - [IPYR_HUMAN]                             | 1.26E-03 | 7.16E-03 | down | -1.2080727 |
| P15880 | 40S ribosomal protein S2 OS=Homo sapiens GN=RPS2 PE=1 SV=2 - [RS2_HUMAN]                               | 1.95E-02 | 4.55E-02 | down | -1.215076  |

|        |                                                                                                        |          |          |      |            |
|--------|--------------------------------------------------------------------------------------------------------|----------|----------|------|------------|
| P46783 | 40S ribosomal protein S10 OS=Homo sapiens GN=RPS10 PE=1 SV=1 - [RS10_HUMAN]                            | 2.39E-03 | 1.10E-02 | down | -1.2302696 |
| P22626 | Heterogeneous nuclear ribonucleoproteins A2/B1 OS=Homo sapiens GN=HNRNPA2B1 PE=1 SV=2 - [ROA2_HUMAN]   | 2.37E-03 | 1.09E-02 | down | -1.1977986 |
| P61106 | Ras-related protein Rab-14 OS=Homo sapiens GN=RAB14 PE=1 SV=4 - [RAB14_HUMAN]                          | 2.73E-03 | 1.21E-02 | up   | 1.3336896  |
| P15311 | Ezrin OS=Homo sapiens GN=EZR PE=1 SV=4 - [EZRI_HUMAN]                                                  | 1.62E-04 | 2.44E-03 | up   | 1.450627   |
| P11021 | 78 kDa glucose-regulated protein OS=Homo sapiens GN=HSPA5 PE=1 SV=2 - [GRP78_HUMAN]                    | 2.86E-04 | 3.27E-03 | up   | 1.4802543  |
| P61247 | 40S ribosomal protein S3a OS=Homo sapiens GN=RPS3A PE=1 SV=2 - [RS3A_HUMAN]                            | 2.55E-03 | 1.15E-02 | down | -1.1924746 |
| P26641 | Elongation factor 1-gamma OS=Homo sapiens GN=EEF1G PE=1 SV=3 - [EF1G_HUMAN]                            | 1.71E-03 | 8.55E-03 | down | -1.1577983 |
| P30101 | Protein disulfide-isomerase A3 OS=Homo sapiens GN=PDIA3 PE=1 SV=4 - [PDIA3_HUMAN]                      | 9.50E-04 | 6.11E-03 | up   | 1.4193659  |
| Q14247 | Src substrate cortactin OS=Homo sapiens GN=CTTN PE=1 SV=2 - [SRC8_HUMAN]                               | 1.97E-02 | 4.59E-02 | down | -1.1920252 |
| Q02543 | 60S ribosomal protein L18a OS=Homo sapiens GN=RPL18A PE=1 SV=2 - [RL18A_HUMAN]                         | 7.13E-04 | 5.30E-03 | down | -1.1813025 |
| Q02878 | 60S ribosomal protein L6 OS=Homo sapiens GN=RPL6 PE=1 SV=3 - [RL6_HUMAN]                               | 1.49E-02 | 3.75E-02 | down | -1.150198  |
| P16152 | Carbonyl reductase [NADPH] 1 OS=Homo sapiens GN=CBR1 PE=1 SV=3 - [CBR1_HUMAN]                          | 2.03E-02 | 4.68E-02 | up   | 1.2413833  |
| P49327 | Fatty acid synthase OS=Homo sapiens GN=FASN PE=1 SV=3 - [FAS_HUMAN]                                    | 1.84E-02 | 4.35E-02 | up   | 1.1383919  |
| Q01518 | Adenylyl cyclase-associated protein 1 OS=Homo sapiens GN=CAP1 PE=1 SV=5 - [CAP1_HUMAN]                 | 7.91E-04 | 5.60E-03 | down | -1.3925996 |
| P13010 | X-ray repair cross-complementing protein 5 OS=Homo sapiens GN=XRCC5 PE=1 SV=3 - [XRCC5_HUMAN]          | 5.67E-04 | 4.64E-03 | down | -1.3123354 |
| P68036 | Ubiquitin-conjugating enzyme E2 L3 OS=Homo sapiens GN=UBE2L3 PE=1 SV=1 - [UB2L3_HUMAN]                 | 8.69E-03 | 2.58E-02 | up   | 1.2318766  |
| P21796 | Voltage-dependent anion-selective channel protein 1 OS=Homo sapiens GN=VDAC1 PE=1 SV=2 - [VDAC1_HUMAN] | 1.32E-03 | 7.37E-03 | up   | 1.236651   |
| P62081 | 40S ribosomal protein S7 OS=Homo sapiens GN=RPS7 PE=1 SV=1 - [RS7_HUMAN]                               | 1.38E-02 | 3.54E-02 | down | -1.2224071 |
| P06576 | ATP synthase subunit beta, mitochondrial OS=Homo sapiens GN=ATP5B PE=1 SV=3 - [ATPB_HUMAN]             | 3.94E-03 | 1.52E-02 | down | -1.2279522 |
| P62424 | 60S ribosomal protein L7a OS=Homo sapiens GN=RPL7A PE=1 SV=2 - [RL7A_HUMAN]                            | 1.67E-04 | 2.44E-03 | down | -1.2012862 |
| P63241 | Eukaryotic translation initiation factor 5A-1 OS=Homo sapiens GN=EIF5A PE=1 SV=2 - [IF5A1_HUMAN]       | 2.84E-04 | 3.27E-03 | down | -1.6620091 |
| P17174 | Aspartate aminotransferase, cytoplasmic OS=Homo sapiens GN=GOT1 PE=1 SV=3 - [AATC_HUMAN]               | 2.10E-02 | 4.81E-02 | down | -1.1220492 |
| P62820 | Ras-related protein Rab-1A OS=Homo sapiens GN=RAB1A PE=1 SV=3 - [RAB1A_HUMAN]                          | 3.44E-03 | 1.40E-02 | up   | 1.2865559  |
| Q05639 | Elongation factor 1-alpha 2 OS=Homo sapiens GN=EEF1A2 PE=1 SV=1 - [EF1A2_HUMAN]                        | 5.03E-07 | 8.34E-04 | up   | 3.5856824  |
| P61019 | Ras-related protein Rab-2A OS=Homo sapiens GN=RAB2A PE=1 SV=1 - [RAB2A_HUMAN]                          | 3.66E-04 | 3.61E-03 | up   | 1.3084416  |
| P12814 | Alpha-actinin-1 OS=Homo sapiens GN=ACTN1 PE=1 SV=2 - [ACTN1_HUMAN]                                     | 6.70E-03 | 2.15E-02 | up   | 1.1193713  |
| P30042 | ES1 protein homolog, mitochondrial OS=Homo sapiens GN=C21orf33 PE=1 SV=3 - [ES1_HUMAN]                 | 7.37E-03 | 2.27E-02 | up   | 1.1812938  |
| P18669 | Phosphoglycerate mutase 1 OS=Homo sapiens GN=PGAM1 PE=1 SV=2 - [PGAM1_HUMAN]                           | 5.42E-03 | 1.88E-02 | down | -1.2068174 |
| P48047 | ATP synthase subunit O, mitochondrial OS=Homo sapiens GN=ATP5O PE=1 SV=1 - [ATPO_HUMAN]                | 1.35E-02 | 3.49E-02 | down | -1.2747991 |
| Q16881 | Thioredoxin reductase 1, cytoplasmic OS=Homo sapiens GN=TXNRD1 PE=1 SV=3 - [TRXR1_HUMAN]               | 5.27E-03 | 1.85E-02 | up   | 1.1081886  |
| P30085 | UMP-CMP kinase OS=Homo sapiens GN=CMKP1 PE=1 SV=3 - [KCY_HUMAN]                                        | 1.13E-03 | 6.80E-03 | down | -1.6023248 |
| P07237 | Protein disulfide-isomerase OS=Homo sapiens GN=P4HB PE=1 SV=3 - [PDIA1_HUMAN]                          | 7.16E-03 | 2.24E-02 | up   | 1.2946332  |
| P38646 | Stress-70 protein, mitochondrial OS=Homo sapiens GN=HSPA9 PE=1 SV=2 - [GRP75_HUMAN]                    | 5.20E-03 | 1.83E-02 | up   | 1.196175   |
| P11413 | Glucose-6-phosphate 1-dehydrogenase OS=Homo sapiens GN=G6PD PE=1 SV=4 - [G6PD_HUMAN]                   | 2.67E-03 | 1.19E-02 | up   | 1.1954743  |

|        |                                                                                                        |          |          |      |            |
|--------|--------------------------------------------------------------------------------------------------------|----------|----------|------|------------|
| P62263 | 40S ribosomal protein S14 OS=Homo sapiens GN=RPS14 PE=1 SV=3 - [RS14_HUMAN]                            | 1.18E-02 | 3.19E-02 | down | -1.3029432 |
| P27348 | 14-3-3 protein theta OS=Homo sapiens GN=YWHAQ PE=1 SV=1 - [1433T_HUMAN]                                | 9.39E-03 | 2.71E-02 | up   | 1.2264786  |
| P08708 | 40S ribosomal protein S17 OS=Homo sapiens GN=RPS17 PE=1 SV=2 - [RS17_HUMAN]                            | 1.91E-02 | 4.47E-02 | down | -1.2349489 |
| P25705 | ATP synthase subunit alpha, mitochondrial OS=Homo sapiens GN=ATP5A1 PE=1 SV=1 - [ATPA_HUMAN]           | 1.17E-03 | 6.90E-03 | down | -1.2573305 |
| Q06323 | Proteasome activator complex subunit 1 OS=Homo sapiens GN=PSME1 PE=1 SV=1 - [PSME1_HUMAN]              | 1.40E-02 | 3.58E-02 | up   | 1.2133229  |
| P55072 | Transitional endoplasmic reticulum ATPase OS=Homo sapiens GN=VCP PE=1 SV=4 - [TERA_HUMAN]              | 3.22E-03 | 1.34E-02 | down | -1.1345266 |
| Q13509 | Tubulin beta-3 chain OS=Homo sapiens GN=TUBB3 PE=1 SV=2 - [TBB3_HUMAN]                                 | 2.35E-03 | 1.08E-02 | down | -1.366184  |
| P12235 | ADP/ATP translocase 1 OS=Homo sapiens GN=SLC25A4 PE=1 SV=4 - [ADT1_HUMAN]                              | 2.13E-03 | 1.01E-02 | up   | 1.2829441  |
| P83731 | 60S ribosomal protein L24 OS=Homo sapiens GN=RPL24 PE=1 SV=1 - [RL24_HUMAN]                            | 8.73E-04 | 5.88E-03 | down | -1.1736782 |
| P09661 | U2 small nuclear ribonucleoprotein A' OS=Homo sapiens GN=SNRPA1 PE=1 SV=2 - [RU2A_HUMAN]               | 3.31E-03 | 1.37E-02 | down | -1.1250858 |
| P18621 | 60S ribosomal protein L17 OS=Homo sapiens GN=RPL17 PE=1 SV=3 - [RL17_HUMAN]                            | 5.61E-03 | 1.93E-02 | down | -1.1430866 |
| P22102 | Trifunctional purine biosynthetic protein adenosine-3 OS=Homo sapiens GN=GART PE=1 SV=1 - [PUR2_HUMAN] | 6.71E-05 | 1.84E-03 | down | -1.5227143 |
| P49588 | Alanine--tRNA ligase, cytoplasmic OS=Homo sapiens GN=AARS PE=1 SV=2 - [SYAC_HUMAN]                     | 3.50E-03 | 1.41E-02 | up   | 1.4299626  |
| Q08257 | Quinone oxidoreductase OS=Homo sapiens GN=CRYZ PE=1 SV=1 - [QOR_HUMAN]                                 | 1.95E-05 | 1.36E-03 | down | -1.3778034 |
| P02794 | Ferritin heavy chain OS=Homo sapiens GN=FTH1 PE=1 SV=2 - [FRIH_HUMAN]                                  | 5.66E-04 | 4.64E-03 | up   | 1.9602916  |
| O60506 | Heterogeneous nuclear ribonucleoprotein Q OS=Homo sapiens GN=SYNCRIP PE=1 SV=2 - [HNRPQ_HUMAN]         | 1.30E-03 | 7.30E-03 | up   | 1.2307497  |
| Q15907 | Ras-related protein Rab-11B OS=Homo sapiens GN=RAB11B PE=1 SV=4 - [RB11B_HUMAN]                        | 3.47E-04 | 3.55E-03 | up   | 1.2526463  |
| P11586 | C-1-tetrahydrofolate synthase, cytoplasmic OS=Homo sapiens GN=MTHFD1 PE=1 SV=3 - [C1TC_HUMAN]          | 3.78E-04 | 3.62E-03 | down | -1.4721048 |
| P62826 | GTP-binding nuclear protein Ran OS=Homo sapiens GN=RAN PE=1 SV=3 - [RAN_HUMAN]                         | 1.23E-02 | 3.28E-02 | down | -1.3588738 |
| P14625 | Endoplasmic reticulum protein OS=Homo sapiens GN=HSP90B1 PE=1 SV=1 - [ENPL_HUMAN]                      | 2.15E-05 | 1.36E-03 | up   | 1.6472217  |
| P27635 | 60S ribosomal protein L10 OS=Homo sapiens GN=RPL10 PE=1 SV=4 - [RL10_HUMAN]                            | 1.58E-02 | 3.89E-02 | down | -1.1761628 |
| P80188 | Neutrophil gelatinase-associated lipocalin OS=Homo sapiens GN=LCN2 PE=1 SV=2 - [NGAL_HUMAN]            | 2.94E-03 | 1.28E-02 | up   | 2.7148077  |
| P68431 | Histone H3.1 OS=Homo sapiens GN=HIST1H3A PE=1 SV=2 - [H31_HUMAN]                                       | 1.11E-02 | 3.04E-02 | down | -1.4482012 |
| P39023 | 60S ribosomal protein L3 OS=Homo sapiens GN=RPL3 PE=1 SV=2 - [RL3_HUMAN]                               | 3.22E-03 | 1.34E-02 | down | -1.179685  |
| P62917 | 60S ribosomal protein L8 OS=Homo sapiens GN=RPL8 PE=1 SV=2 - [RL8_HUMAN]                               | 6.32E-03 | 2.08E-02 | down | -1.1288501 |
| P62906 | 60S ribosomal protein L10a OS=Homo sapiens GN=RPL10A PE=1 SV=2 - [RL10A_HUMAN]                         | 7.02E-03 | 2.22E-02 | down | -1.1210649 |
| P40925 | Malate dehydrogenase, cytoplasmic OS=Homo sapiens GN=MDH1 PE=1 SV=4 - [MDHC_HUMAN]                     | 4.25E-04 | 3.88E-03 | up   | 1.2935199  |
| P46781 | 40S ribosomal protein S9 OS=Homo sapiens GN=RPS9 PE=1 SV=3 - [RS9_HUMAN]                               | 4.72E-03 | 1.69E-02 | down | -1.1730803 |
| Q16658 | Fascin OS=Homo sapiens GN=FSCN1 PE=1 SV=3 - [FSCN1_HUMAN]                                              | 1.81E-03 | 8.88E-03 | down | -1.8247709 |
| P62280 | 40S ribosomal protein S11 OS=Homo sapiens GN=RPS11 PE=1 SV=3 - [RS11_HUMAN]                            | 7.24E-04 | 5.35E-03 | down | -1.2117864 |
| P12956 | X-ray repair cross-complementing protein 6 OS=Homo sapiens GN=XRCC6 PE=1 SV=2 - [XRCC6_HUMAN]          | 9.95E-05 | 2.01E-03 | down | -1.3034099 |
| P17844 | Probable ATP-dependent RNA helicase DDX5 OS=Homo sapiens GN=DDX5 PE=1 SV=1 - [DDX5_HUMAN]              | 2.52E-04 | 3.07E-03 | down | -1.3476697 |
| P61353 | 60S ribosomal protein L27 OS=Homo sapiens GN=RPL27 PE=1 SV=2 - [RL27_HUMAN]                            | 6.65E-04 | 5.11E-03 | down | -1.1860358 |
| P62266 | 40S ribosomal protein S23 OS=Homo sapiens GN=RPS23 PE=1 SV=3 - [RS23_HUMAN]                            | 1.35E-02 | 3.49E-02 | down | -1.2439618 |

|        |                                                                                                                           |          |          |      |            |
|--------|---------------------------------------------------------------------------------------------------------------------------|----------|----------|------|------------|
| P29401 | Transketolase OS=Homo sapiens GN=TKT PE=1 SV=3 - [TKT_HUMAN]                                                              | 4.42E-03 | 1.64E-02 | up   | 1.203193   |
| P13804 | Electron transfer flavoprotein subunit alpha, mitochondrial OS=Homo sapiens GN=ETFA PE=1 SV=1 - [ETFA_HUMAN]              | 7.37E-06 | 1.35E-03 | up   | 1.5177015  |
| P05161 | Ubiquitin-like protein ISG15 OS=Homo sapiens GN=ISG15 PE=1 SV=5 - [ISG15_HUMAN]                                           | 6.08E-05 | 1.78E-03 | down | -2.0635717 |
| Q92841 | Probable ATP-dependent RNA helicase DDX17 OS=Homo sapiens GN=DDX17 PE=1 SV=2 - [DDX17_HUMAN]                              | 3.65E-04 | 3.61E-03 | up   | 1.1654038  |
| P00918 | Carbonic anhydrase 2 OS=Homo sapiens GN=CA2 PE=1 SV=2 - [CAH2_HUMAN]                                                      | 1.44E-02 | 3.66E-02 | up   | 1.3509647  |
| Q00610 | Clathrin heavy chain 1 OS=Homo sapiens GN=CLTC PE=1 SV=5 - [CLH1_HUMAN]                                                   | 9.59E-04 | 6.13E-03 | up   | 1.2153449  |
| P62191 | 26S protease regulatory subunit 4 OS=Homo sapiens GN=PSMC1 PE=1 SV=1 - [PRS4_HUMAN]                                       | 6.86E-03 | 2.19E-02 | down | -1.1891428 |
| Q04760 | Lactoylglutathione lyase OS=Homo sapiens GN=GLO1 PE=1 SV=4 - [LGUL_HUMAN]                                                 | 2.11E-02 | 4.82E-02 | up   | 1.1353526  |
| P43490 | Nicotinamide phosphoribosyltransferase OS=Homo sapiens GN=NAMPT PE=1 SV=1 - [NAMPT_HUMAN]                                 | 1.84E-06 | 8.34E-04 | up   | 1.7633975  |
| P26038 | Moesin OS=Homo sapiens GN=MSN PE=1 SV=3 - [MOES_HUMAN]                                                                    | 3.04E-03 | 1.29E-02 | down | -1.4272814 |
| O60701 | UDP-glucose 6-dehydrogenase OS=Homo sapiens GN=UGDH PE=1 SV=1 - [UGDH_HUMAN]                                              | 5.83E-05 | 1.78E-03 | up   | 1.2146384  |
| P04843 | Dolichyl-diphosphooligosaccharide--protein glycosyltransferase subunit 1 OS=Homo sapiens GN=RPN1 PE=1 SV=1 - [RPN1_HUMAN] | 1.66E-02 | 4.04E-02 | up   | 1.1063002  |
| P00568 | Adenylate kinase isoenzyme 1 OS=Homo sapiens GN=AK1 PE=1 SV=3 - [KAD1_HUMAN]                                              | 1.52E-02 | 3.80E-02 | up   | 1.2606336  |
| P17980 | 26S protease regulatory subunit 6A OS=Homo sapiens GN=PSMC3 PE=1 SV=3 - [PRS6A_HUMAN]                                     | 4.27E-03 | 1.61E-02 | down | -1.1797079 |
| P46779 | 60S ribosomal protein L28 OS=Homo sapiens GN=RPL28 PE=1 SV=3 - [RL28_HUMAN]                                               | 1.52E-02 | 3.80E-02 | down | -1.2236639 |
| P47895 | Aldehyde dehydrogenase family 1 member A3 OS=Homo sapiens GN=ALDH1A3 PE=1 SV=2 - [AL1A3_HUMAN]                            | 2.31E-03 | 1.07E-02 | down | -1.1389194 |
| P13667 | Protein disulfide-isomerase A4 OS=Homo sapiens GN=PDIA4 PE=1 SV=2 - [PDIA4_HUMAN]                                         | 6.37E-05 | 1.78E-03 | up   | 1.4710776  |
| Q9NX63 | MICOS complex subunit MIC19 OS=Homo sapiens GN=CHCHD3 PE=1 SV=1 - [MIC19_HUMAN]                                           | 1.67E-03 | 8.47E-03 | up   | 1.286661   |
| P61289 | Proteasome activator complex subunit 3 OS=Homo sapiens GN=PSME3 PE=1 SV=1 - [PSME3_HUMAN]                                 | 2.30E-03 | 1.07E-02 | down | -1.100153  |
| P31939 | Bifunctional purine biosynthesis protein PURH OS=Homo sapiens GN=ATIC PE=1 SV=3 - [PUR9_HUMAN]                            | 1.45E-05 | 1.36E-03 | down | -1.2837373 |
| Q96C19 | EF-hand domain-containing protein D2 OS=Homo sapiens GN=EFHD2 PE=1 SV=1 - [EFHD2_HUMAN]                                   | 5.46E-05 | 1.78E-03 | down | -2.5403726 |
| P14923 | Junction plakoglobin OS=Homo sapiens GN=JUP PE=1 SV=3 - [PLAK_HUMAN]                                                      | 3.41E-03 | 1.40E-02 | up   | 1.227592   |
| Q15084 | Protein disulfide-isomerase A6 OS=Homo sapiens GN=PDIA6 PE=1 SV=1 - [PDIA6_HUMAN]                                         | 4.85E-05 | 1.78E-03 | up   | 1.4844995  |
| P36578 | 60S ribosomal protein L4 OS=Homo sapiens GN=RPL4 PE=1 SV=5 - [RL4_HUMAN]                                                  | 6.73E-03 | 2.16E-02 | down | -1.1735872 |
| P00387 | NADH-cytochrome b5 reductase 3 OS=Homo sapiens GN=CYB5R3 PE=1 SV=3 - [NB5R3_HUMAN]                                        | 3.01E-03 | 1.28E-02 | up   | 1.1891589  |
| O43175 | D-3-phosphoglycerate dehydrogenase OS=Homo sapiens GN=PHGDH PE=1 SV=4 - [SERA_HUMAN]                                      | 1.49E-04 | 2.44E-03 | down | -2.1595984 |
| P51991 | Heterogeneous nuclear ribonucleoprotein A3 OS=Homo sapiens GN=HNRNPA3 PE=1 SV=2 - [ROA3_HUMAN]                            | 1.40E-02 | 3.58E-02 | down | -1.2101227 |
| Q14240 | Eukaryotic initiation factor 4A-II OS=Homo sapiens GN=EIF4A2 PE=1 SV=2 - [IF4A2_HUMAN]                                    | 9.63E-03 | 2.75E-02 | up   | 1.2813967  |
| Q9UL46 | Proteasome activator complex subunit 2 OS=Homo sapiens GN=PSME2 PE=1 SV=4 - [PSME2_HUMAN]                                 | 9.75E-03 | 2.77E-02 | up   | 1.209638   |
| P40939 | Trifunctional enzyme subunit alpha, mitochondrial OS=Homo sapiens GN=HADHA PE=1 SV=2 - [ECHA_HUMAN]                       | 5.81E-03 | 1.98E-02 | up   | 1.198289   |
| P52907 | F-actin-capping protein subunit alpha-1 OS=Homo sapiens GN=CAPZA1 PE=1 SV=3 - [CAZA1_HUMAN]                               | 9.21E-04 | 6.09E-03 | down | -1.482052  |
| O75347 | Tubulin-specific chaperone A OS=Homo sapiens GN=TBCA PE=1 SV=3 - [TBCA_HUMAN]                                             | 6.10E-03 | 2.03E-02 | down | -1.1259292 |
| O00264 | Membrane-associated progesterone receptor component 1 OS=Homo sapiens GN=PGRMC1 PE=1 SV=3 - [PGRC1_HUMAN]                 | 5.31E-03 | 1.86E-02 | up   | 1.391766   |
| P35221 | Catenin alpha-1 OS=Homo sapiens GN=CTNNA1 PE=1 SV=1 - [CTNA1_HUMAN]                                                       | 2.30E-03 | 1.07E-02 | up   | 1.3006402  |

|        |                                                                                                                   |          |          |      |            |
|--------|-------------------------------------------------------------------------------------------------------------------|----------|----------|------|------------|
| P46777 | 60S ribosomal protein L5 OS=Homo sapiens GN=RPL5 PE=1 SV=3 - [RL5_HUMAN]                                          | 1.57E-02 | 3.87E-02 | down | -1.133346  |
| P61026 | Ras-related protein Rab-10 OS=Homo sapiens GN=RAB10 PE=1 SV=1 - [RAB10_HUMAN]                                     | 1.19E-02 | 3.21E-02 | up   | 1.2246257  |
| P04080 | Cystatin-B OS=Homo sapiens GN=CSTB PE=1 SV=2 - [CYTB_HUMAN]                                                       | 1.33E-02 | 3.46E-02 | up   | 1.2581038  |
| P61586 | Transforming protein RhoA OS=Homo sapiens GN=RHOA PE=1 SV=1 - [RHOA_HUMAN]                                        | 9.88E-03 | 2.79E-02 | up   | 1.2297707  |
| P33993 | DNA replication licensing factor MCM7 OS=Homo sapiens GN=MCM7 PE=1 SV=4 - [MCM7_HUMAN]                            | 9.86E-04 | 6.21E-03 | down | -1.3645427 |
| P23526 | Adenosylhomocysteinase OS=Homo sapiens GN=AHCY PE=1 SV=4 - [SAHH_HUMAN]                                           | 1.32E-03 | 7.37E-03 | down | -1.2220912 |
| Q16891 | MICOS complex subunit MIC60 OS=Homo sapiens GN=IMMT PE=1 SV=1 - [MIC60_HUMAN]                                     | 5.65E-03 | 1.94E-02 | up   | 1.2135626  |
| P20339 | Ras-related protein Rab-5A OS=Homo sapiens GN=RAB5A PE=1 SV=2 - [RAB5A_HUMAN]                                     | 1.16E-02 | 3.15E-02 | up   | 1.2418282  |
| P05198 | Eukaryotic translation initiation factor 2 subunit 1 OS=Homo sapiens GN=EIF2S1 PE=1 SV=3 - [IF2A_HUMAN]           | 4.26E-03 | 1.61E-02 | down | -1.2081513 |
| P62851 | 40S ribosomal protein S25 OS=Homo sapiens GN=RPS25 PE=1 SV=1 - [RS25_HUMAN]                                       | 8.74E-03 | 2.58E-02 | down | -1.1635156 |
| Q15149 | Plectin OS=Homo sapiens GN=PLEC PE=1 SV=3 - [PLEC_HUMAN]                                                          | 4.65E-03 | 1.68E-02 | up   | 1.239284   |
| P33316 | Deoxyuridine 5'-triphosphate nucleotidohydrolase, mitochondrial OS=Homo sapiens GN=DUT PE=1 SV=4 - [DUT_HUMAN]    | 1.03E-03 | 6.39E-03 | down | -1.6526828 |
| O00303 | Eukaryotic translation initiation factor 3 subunit F OS=Homo sapiens GN=EIF3F PE=1 SV=1 - [EIF3F_HUMAN]           | 4.07E-03 | 1.56E-02 | down | -1.1988128 |
| Q92688 | Acidic leucine-rich nuclear phosphoprotein 32 family member B OS=Homo sapiens GN=ANP32B PE=1 SV=1 - [AN32B_HUMAN] | 1.34E-03 | 7.38E-03 | up   | 1.3922219  |
| P04181 | Ornithine aminotransferase, mitochondrial OS=Homo sapiens GN=OAT PE=1 SV=1 - [OAT_HUMAN]                          | 2.08E-02 | 4.78E-02 | up   | 1.2362257  |
| P00441 | Superoxide dismutase [Cu-Zn] OS=Homo sapiens GN=SOD1 PE=1 SV=2 - [SODC_HUMAN]                                     | 1.91E-02 | 4.47E-02 | up   | 1.169954   |
| P35613 | Basigin OS=Homo sapiens GN=BSG PE=1 SV=2 - [BASI_HUMAN]                                                           | 2.83E-03 | 1.24E-02 | down | -1.4603549 |
| P30044 | Peroxisedoxin-5, mitochondrial OS=Homo sapiens GN=PRDX5 PE=1 SV=4 - [PRDX5_HUMAN]                                 | 4.86E-03 | 1.73E-02 | up   | 1.3072814  |
| P19338 | Nucleolin OS=Homo sapiens GN=NCL PE=1 SV=3 - [NUCL_HUMAN]                                                         | 6.74E-04 | 5.11E-03 | down | -1.3032299 |
| Q9Y617 | Phosphoserine aminotransferase OS=Homo sapiens GN=PSAT1 PE=1 SV=2 - [SERC_HUMAN]                                  | 5.72E-04 | 4.65E-03 | up   | 1.1873496  |
| Q04828 | Aldo-keto reductase family 1 member C1 OS=Homo sapiens GN=AKR1C1 PE=1 SV=1 - [AK1C1_HUMAN]                        | 1.10E-04 | 2.10E-03 | up   | 2.9348218  |
| O43390 | Heterogeneous nuclear ribonucleoprotein R OS=Homo sapiens GN=HNRNPR PE=1 SV=1 - [HNRPR_HUMAN]                     | 1.15E-04 | 2.14E-03 | down | -1.4232169 |
| Q9NR30 | Nucleolar RNA helicase 2 OS=Homo sapiens GN=DDX21 PE=1 SV=5 - [DDX21_HUMAN]                                       | 1.93E-04 | 2.70E-03 | down | -1.6687161 |
| P20700 | Lamin-B1 OS=Homo sapiens GN=LMNB1 PE=1 SV=2 - [LMNB1_HUMAN]                                                       | 4.39E-04 | 3.99E-03 | down | -1.4446604 |
| P67809 | Nuclease-sensitive element-binding protein 1 OS=Homo sapiens GN=YBX1 PE=1 SV=3 - [YBOX1_HUMAN]                    | 1.67E-02 | 4.04E-02 | down | -1.1535116 |
| P22314 | Ubiquitin-like modifier-activating enzyme 1 OS=Homo sapiens GN=UBA1 PE=1 SV=3 - [UBA1_HUMAN]                      | 1.43E-03 | 7.73E-03 | down | -1.1387231 |
| P40429 | 60S ribosomal protein L13a OS=Homo sapiens GN=RPL13A PE=1 SV=2 - [RL13A_HUMAN]                                    | 7.47E-04 | 5.41E-03 | down | -1.1757252 |
| P11940 | Polyadenylate-binding protein 1 OS=Homo sapiens GN=PABPC1 PE=1 SV=2 - [PABP1_HUMAN]                               | 7.66E-04 | 5.50E-03 | down | -1.1792278 |
| P37837 | Transaldolase OS=Homo sapiens GN=TALDO1 PE=1 SV=2 - [TALDO_HUMAN]                                                 | 1.42E-04 | 2.43E-03 | up   | 1.5685321  |
| Q9NUQ9 | Protein FAM49B OS=Homo sapiens GN=FAM49B PE=1 SV=1 - [FA49B_HUMAN]                                                | 2.48E-04 | 3.05E-03 | up   | 1.3108495  |
| Q99986 | Serine/threonine-protein kinase VRK1 OS=Homo sapiens GN=VRK1 PE=1 SV=1 - [VRK1_HUMAN]                             | 9.19E-04 | 6.09E-03 | down | -1.5845141 |
| Q9BUF5 | Tubulin beta-6 chain OS=Homo sapiens GN=TUBB6 PE=1 SV=1 - [TBB6_HUMAN]                                            | 4.40E-03 | 1.64E-02 | down | -1.327108  |
| Q13185 | Chromobox protein homolog 3 OS=Homo sapiens GN=CBX3 PE=1 SV=4 - [CBX3_HUMAN]                                      | 1.03E-02 | 2.88E-02 | down | -1.2591394 |
| Q9Y4L1 | Hypoxia up-regulated protein 1 OS=Homo sapiens GN=HYOU1 PE=1 SV=1 - [HYOU1_HUMAN]                                 | 7.35E-04 | 5.38E-03 | up   | 1.3731519  |

|        |                                                                                                                   |          |          |      |            |
|--------|-------------------------------------------------------------------------------------------------------------------|----------|----------|------|------------|
| Q13242 | Serine/arginine-rich splicing factor 9 OS=Homo sapiens GN=SRSF9 PE=1 SV=1 - [SRSF9_HUMAN]                         | 9.52E-04 | 6.11E-03 | down | -1.2412403 |
| P42330 | Aldo-keto reductase family 1 member C3 OS=Homo sapiens GN=AKR1C3 PE=1 SV=4 - [AK1C3_HUMAN]                        | 1.41E-03 | 7.65E-03 | up   | 2.4039125  |
| P12268 | Inosine-5'-monophosphate dehydrogenase 2 OS=Homo sapiens GN=IMPDH2 PE=1 SV=2 - [IMDH2_HUMAN]                      | 4.93E-04 | 4.30E-03 | down | -1.2885474 |
| Q99798 | Aconitate hydratase, mitochondrial OS=Homo sapiens GN=ACO2 PE=1 SV=2 - [ACON_HUMAN]                               | 7.45E-04 | 5.41E-03 | up   | 1.3294115  |
| Q03135 | Caveolin-1 OS=Homo sapiens GN=CAV1 PE=1 SV=4 - [CAV1_HUMAN]                                                       | 1.70E-02 | 4.10E-02 | down | -1.1861877 |
| Q13310 | Polyadenylate-binding protein 4 OS=Homo sapiens GN=PABPC4 PE=1 SV=1 - [PABP4_HUMAN]                               | 8.23E-05 | 1.93E-03 | down | -1.4894267 |
| O76003 | Glutaredoxin-3 OS=Homo sapiens GN=GLRX3 PE=1 SV=2 - [GLRX3_HUMAN]                                                 | 8.96E-04 | 5.99E-03 | down | -1.3019738 |
| Q01081 | Splicing factor U2AF 35 kDa subunit OS=Homo sapiens GN=U2AF1 PE=1 SV=3 - [U2AF1_HUMAN]                            | 1.28E-02 | 3.36E-02 | down | -1.1551194 |
| P27824 | Calnexin OS=Homo sapiens GN=CANX PE=1 SV=2 - [CALX_HUMAN]                                                         | 8.45E-03 | 2.51E-02 | up   | 1.2374053  |
| O95433 | Activator of 90 kDa heat shock protein ATPase homolog 1 OS=Homo sapiens GN=AHSA1 PE=1 SV=1 - [AHSA1_HUMAN]        | 1.64E-05 | 1.36E-03 | down | -1.598835  |
| P62333 | 26S protease regulatory subunit 10B OS=Homo sapiens GN=PSMC6 PE=1 SV=1 - [PRS10_HUMAN]                            | 4.87E-03 | 1.73E-02 | down | -1.24646   |
| P30740 | Leukocyte elastase inhibitor OS=Homo sapiens GN=SERPINB1 PE=1 SV=1 - [ILEU_HUMAN]                                 | 1.15E-02 | 3.13E-02 | up   | 1.199689   |
| P62913 | 60S ribosomal protein L11 OS=Homo sapiens GN=RPL11 PE=1 SV=2 - [RL11_HUMAN]                                       | 3.52E-03 | 1.41E-02 | down | -1.2254583 |
| P47756 | F-actin-capping protein subunit beta OS=Homo sapiens GN=CAPZB PE=1 SV=4 - [CAPZB_HUMAN]                           | 8.98E-05 | 1.93E-03 | down | -1.361371  |
| Q9P258 | Protein RCC2 OS=Homo sapiens GN=RCC2 PE=1 SV=2 - [RCC2_HUMAN]                                                     | 1.63E-04 | 2.44E-03 | down | -1.5995828 |
| Q92598 | Heat shock protein 105 kDa OS=Homo sapiens GN=HSPH1 PE=1 SV=1 - [HS105_HUMAN]                                     | 8.57E-04 | 5.84E-03 | down | -1.1677066 |
| P38117 | Electron transfer flavoprotein subunit beta OS=Homo sapiens GN=ETFB PE=1 SV=3 - [ETFB_HUMAN]                      | 6.18E-05 | 1.78E-03 | up   | 1.4257207  |
| P50914 | 60S ribosomal protein L14 OS=Homo sapiens GN=RPL14 PE=1 SV=4 - [RL14_HUMAN]                                       | 3.58E-03 | 1.43E-02 | down | -1.2302359 |
| P09972 | Fructose-bisphosphate aldolase C OS=Homo sapiens GN=ALDOC PE=1 SV=2 - [ALDOC_HUMAN]                               | 9.05E-03 | 2.65E-02 | up   | 1.2637615  |
| P35579 | Myosin-9 OS=Homo sapiens GN=MYH9 PE=1 SV=4 - [MYH9_HUMAN]                                                         | 7.89E-05 | 1.93E-03 | down | -1.3237699 |
| P31153 | S-adenosylmethionine synthase isoform type-2 OS=Homo sapiens GN=MAT2A PE=1 SV=1 - [METK2_HUMAN]                   | 1.72E-02 | 4.13E-02 | down | -1.2178786 |
| P49915 | GMP synthase [glutamine-hydrolyzing] OS=Homo sapiens GN=GMPS PE=1 SV=1 - [GUAA_HUMAN]                             | 7.50E-04 | 5.41E-03 | down | -1.1682175 |
| Q9UKM9 | RNA-binding protein Raly OS=Homo sapiens GN=RALY PE=1 SV=1 - [RALY_HUMAN]                                         | 5.28E-04 | 4.49E-03 | down | -1.1826164 |
| P15924 | Desmoplakin OS=Homo sapiens GN=DSP PE=1 SV=3 - [DESP_HUMAN]                                                       | 2.90E-04 | 3.28E-03 | down | -1.4416785 |
| Q9Y265 | RuvB-like 1 OS=Homo sapiens GN=RUVBL1 PE=1 SV=1 - [RUVB1_HUMAN]                                                   | 1.68E-02 | 4.07E-02 | up   | 1.109814   |
| P98179 | RNA-binding protein 3 OS=Homo sapiens GN=RBM3 PE=1 SV=1 - [RBM3_HUMAN]                                            | 8.32E-04 | 5.74E-03 | down | -2.3412771 |
| P62879 | Guanine nucleotide-binding protein G(I)/G(S)/G(T) subunit beta-2 OS=Homo sapiens GN=GNB2 PE=1 SV=3 - [GBB2_HUMAN] | 3.31E-03 | 1.37E-02 | down | -1.1979517 |
| Q53GQ0 | Very-long-chain 3-oxoacyl-CoA reductase OS=Homo sapiens GN=HSD17B12 PE=1 SV=2 - [DHB12_HUMAN]                     | 4.31E-03 | 1.62E-02 | up   | 1.3972734  |
| P09110 | 3-ketoacyl-CoA thiolase, peroxisomal OS=Homo sapiens GN=ACAA1 PE=1 SV=2 - [THIK_HUMAN]                            | 2.72E-04 | 3.20E-03 | up   | 1.2407163  |
| Q9NTK5 | Obg-like ATPase 1 OS=Homo sapiens GN=OLA1 PE=1 SV=2 - [OLA1_HUMAN]                                                | 6.14E-04 | 4.89E-03 | down | -1.3208947 |
| O00571 | ATP-dependent RNA helicase DDX3X OS=Homo sapiens GN=DDX3X PE=1 SV=3 - [DDX3X_HUMAN]                               | 1.66E-02 | 4.03E-02 | down | -1.2072935 |
| Q9NX40 | OCIA domain-containing protein 1 OS=Homo sapiens GN=OCIAD1 PE=1 SV=1 - [OCAD1_HUMAN]                              | 1.49E-03 | 7.96E-03 | up   | 1.1379675  |
| P30048 | Thioredoxin-dependent peroxide reductase, mitochondrial OS=Homo sapiens GN=PRDX3 PE=1 SV=3 - [PRDX3_HUMAN]        | 3.05E-03 | 1.29E-02 | down | -1.1892427 |
| P14868 | Aspartate--tRNA ligase, cytoplasmic OS=Homo sapiens GN=DARS PE=1 SV=2 - [SYDC_HUMAN]                              | 6.66E-03 | 2.15E-02 | down | -1.161467  |



|        |                                                                                                         |          |          |      |            |
|--------|---------------------------------------------------------------------------------------------------------|----------|----------|------|------------|
| P53396 | ATP-citrate synthase OS=Homo sapiens GN=ACLY PE=1 SV=3 - [ACLY_HUMAN]                                   | 1.69E-04 | 2.44E-03 | up   | 1.3355421  |
| Q9HAV7 | GrpE protein homolog 1, mitochondrial OS=Homo sapiens GN=GRPEL1 PE=1 SV=2 - [GRPE1_HUMAN]               | 1.45E-02 | 3.68E-02 | up   | 1.3305161  |
| P13693 | Translationally-controlled tumor protein OS=Homo sapiens GN=TPT1 PE=1 SV=1 - [TCTP_HUMAN]               | 2.90E-04 | 3.28E-03 | down | -1.2956079 |
| P06748 | Nucleophosmin OS=Homo sapiens GN=NPM1 PE=1 SV=2 - [NPM_HUMAN]                                           | 1.44E-03 | 7.75E-03 | down | -1.2478081 |
| Q86VP6 | Cullin-associated NEDD8-dissociated protein 1 OS=Homo sapiens GN=CAND1 PE=1 SV=2 - [CAND1_HUMAN]        | 1.54E-03 | 8.10E-03 | up   | 1.1377778  |
| P55084 | Trifunctional enzyme subunit beta, mitochondrial OS=Homo sapiens GN=HADHB PE=1 SV=3 - [ECHB_HUMAN]      | 3.42E-04 | 3.55E-03 | up   | 1.2763329  |
| P07339 | Cathepsin D OS=Homo sapiens GN=CTSD PE=1 SV=1 - [CATD_HUMAN]                                            | 6.07E-03 | 2.03E-02 | up   | 1.1749836  |
| P16615 | Sarcoplasmic/endoplasmic reticulum calcium ATPase 2 OS=Homo sapiens GN=ATP2A2 PE=1 SV=1 - [AT2A2_HUMAN] | 2.10E-03 | 9.98E-03 | up   | 1.4429438  |
| P07384 | Calpain-1 catalytic subunit OS=Homo sapiens GN=CAPN1 PE=1 SV=1 - [CAN1_HUMAN]                           | 7.07E-05 | 1.86E-03 | up   | 1.4105902  |
| Q12931 | Heat shock protein 75 kDa, mitochondrial OS=Homo sapiens GN=TRAP1 PE=1 SV=3 - [TRAP1_HUMAN]             | 7.43E-03 | 2.27E-02 | up   | 1.1836349  |
| O15372 | Eukaryotic translation initiation factor 3 subunit H OS=Homo sapiens GN=EIF3H PE=1 SV=1 - [EIF3H_HUMAN] | 1.59E-03 | 8.28E-03 | down | -1.2745551 |
| Q9Y547 | Intraflagellar transport protein 25 homolog OS=Homo sapiens GN=HSPB11 PE=1 SV=1 - [IFT25_HUMAN]         | 5.95E-05 | 1.78E-03 | down | -1.5542209 |
| P48163 | NADP-dependent malic enzyme OS=Homo sapiens GN=ME1 PE=1 SV=1 - [MAOX_HUMAN]                             | 3.25E-04 | 3.46E-03 | up   | 1.3942713  |
| P46926 | Glucosamine-6-phosphate isomerase 1 OS=Homo sapiens GN=GNPDA1 PE=1 SV=1 - [GNPI1_HUMAN]                 | 2.08E-05 | 1.36E-03 | up   | 1.8899547  |
| O76021 | Ribosomal L1 domain-containing protein 1 OS=Homo sapiens GN=RSL1D1 PE=1 SV=3 - [RL1D1_HUMAN]            | 7.43E-03 | 2.27E-02 | down | -1.1990682 |
| P54577 | Tyrosine--tRNA ligase, cytoplasmic OS=Homo sapiens GN=YARS PE=1 SV=4 - [SYYC_HUMAN]                     | 6.78E-03 | 2.17E-02 | up   | 1.2195108  |
| P06493 | Cyclin-dependent kinase 1 OS=Homo sapiens GN=CDK1 PE=1 SV=3 - [CDK1_HUMAN]                              | 3.08E-04 | 3.39E-03 | down | -1.476753  |
| P49591 | Serine--tRNA ligase, cytoplasmic OS=Homo sapiens GN=SARS PE=1 SV=3 - [SYSC_HUMAN]                       | 1.01E-04 | 2.01E-03 | down | -1.4985554 |
| O75608 | Acyl-protein thioesterase 1 OS=Homo sapiens GN=LYPLA1 PE=1 SV=1 - [LYPA1_HUMAN]                         | 6.94E-04 | 5.21E-03 | up   | 1.6011112  |
| Q9Y696 | Chloride intracellular channel protein 4 OS=Homo sapiens GN=CLIC4 PE=1 SV=4 - [CLIC4_HUMAN]             | 1.52E-04 | 2.44E-03 | down | -1.4006624 |
| O75083 | WD repeat-containing protein 1 OS=Homo sapiens GN=WDR1 PE=1 SV=4 - [WDR1_HUMAN]                         | 2.81E-03 | 1.24E-02 | up   | 1.1481489  |
| Q13151 | Heterogeneous nuclear ribonucleoprotein A0 OS=Homo sapiens GN=HNRNPA0 PE=1 SV=1 - [ROAO_HUMAN]          | 9.43E-04 | 6.11E-03 | down | -1.2118063 |
| P27144 | Adenylate kinase 4, mitochondrial OS=Homo sapiens GN=AK4 PE=1 SV=1 - [KAD4_HUMAN]                       | 3.46E-03 | 1.41E-02 | down | -1.3533028 |
| P23381 | Tryptophan--tRNA ligase, cytoplasmic OS=Homo sapiens GN=WARS PE=1 SV=2 - [SYWC_HUMAN]                   | 4.46E-03 | 1.65E-02 | up   | 1.2812287  |
| Q96K17 | Transcription factor BTF3 homolog 4 OS=Homo sapiens GN=BTF3L4 PE=1 SV=1 - [BT3L4_HUMAN]                 | 5.85E-03 | 1.98E-02 | down | -1.4531513 |
| P32119 | Peroxiredoxin-2 OS=Homo sapiens GN=PRDX2 PE=1 SV=5 - [PRDX2_HUMAN]                                      | 9.14E-03 | 2.65E-02 | up   | 1.1597544  |
| P52565 | Rho GDP-dissociation inhibitor 1 OS=Homo sapiens GN=ARHGDI1 PE=1 SV=3 - [GDIR1_HUMAN]                   | 4.39E-03 | 1.64E-02 | up   | 1.1318933  |
| Q15233 | Non-POU domain-containing octamer-binding protein OS=Homo sapiens GN=NONO PE=1 SV=4 - [NONO_HUMAN]      | 4.47E-04 | 4.02E-03 | down | -1.1952565 |
| Q96AG4 | Leucine-rich repeat-containing protein 59 OS=Homo sapiens GN=LRRC59 PE=1 SV=1 - [LRC59_HUMAN]           | 8.19E-03 | 2.46E-02 | up   | 1.1533757  |
| Q9UBX3 | Mitochondrial dicarboxylate carrier OS=Homo sapiens GN=SLC25A10 PE=1 SV=2 - [DIC_HUMAN]                 | 1.11E-03 | 6.70E-03 | up   | 1.5409805  |
| P13796 | Plastin-2 OS=Homo sapiens GN=LCP1 PE=1 SV=6 - [PLSL_HUMAN]                                              | 1.93E-05 | 1.36E-03 | up   | 4.9645185  |
| O15511 | Actin-related protein 2/3 complex subunit 5 OS=Homo sapiens GN=ARPC5 PE=1 SV=3 - [ARPC5_HUMAN]          | 2.00E-02 | 4.64E-02 | up   | 1.2004961  |
| O75431 | Metaxin-2 OS=Homo sapiens GN=MTX2 PE=1 SV=1 - [MTX2_HUMAN]                                              | 4.09E-03 | 1.56E-02 | up   | 1.2855476  |
| Q01813 | ATP-dependent 6-phosphofructokinase, platelet type OS=Homo sapiens GN=PFKP PE=1 SV=2 - [PFKAP_HUMAN]    | 8.80E-03 | 2.59E-02 | up   | 1.1276958  |

|        |                                                                                                                                                                    |          |          |      |            |
|--------|--------------------------------------------------------------------------------------------------------------------------------------------------------------------|----------|----------|------|------------|
| Q9Y2X3 | Nucleolar protein 58 OS=Homo sapiens GN=NOP58 PE=1 SV=1 - [NOP58_HUMAN]                                                                                            | 8.53E-04 | 5.84E-03 | down | -1.2856553 |
| P54886 | Delta-1-pyrroline-5-carboxylate synthase OS=Homo sapiens GN=ALDH18A1 PE=1 SV=2 - [P5CS_HUMAN]                                                                      | 3.96E-04 | 3.73E-03 | down | -1.4123482 |
| P51665 | 26S proteasome non-ATPase regulatory subunit 7 OS=Homo sapiens GN=PSMD7 PE=1 SV=2 - [PSMD7_HUMAN]                                                                  | 1.72E-02 | 4.13E-02 | down | -1.1022326 |
| P55060 | Exportin-2 OS=Homo sapiens GN=CSE1L PE=1 SV=3 - [XPO2_HUMAN]                                                                                                       | 1.90E-03 | 9.15E-03 | down | -1.1749027 |
| O75396 | Vesicle-trafficking protein SEC22b OS=Homo sapiens GN=SEC22B PE=1 SV=4 - [SC22B_HUMAN]                                                                             | 3.44E-05 | 1.72E-03 | down | -2.1398134 |
| P16402 | Histone H1.3 OS=Homo sapiens GN=HIST1H1D PE=1 SV=2 - [H13_HUMAN]                                                                                                   | 4.48E-03 | 1.65E-02 | down | -1.5689797 |
| Q14566 | DNA replication licensing factor MCM6 OS=Homo sapiens GN=MCM6 PE=1 SV=1 - [MCM6_HUMAN]                                                                             | 3.42E-04 | 3.55E-03 | down | -1.5707914 |
| Q14103 | Heterogeneous nuclear ribonucleoprotein D0 OS=Homo sapiens GN=HNRNPD PE=1 SV=1 - [HNRPD_HUMAN]                                                                     | 1.41E-02 | 3.60E-02 | up   | 1.1316749  |
| P46940 | Ras GTPase-activating-like protein IQGAP1 OS=Homo sapiens GN=IQGAP1 PE=1 SV=1 - [IQGA1_HUMAN]                                                                      | 7.40E-03 | 2.27E-02 | down | -1.1817677 |
| P21333 | Filamin-A OS=Homo sapiens GN=FLNA PE=1 SV=4 - [FLNA_HUMAN]                                                                                                         | 3.00E-03 | 1.28E-02 | down | -1.3866814 |
| P62829 | 60S ribosomal protein L23 OS=Homo sapiens GN=RPL23 PE=1 SV=1 - [RL23_HUMAN]                                                                                        | 9.45E-03 | 2.71E-02 | down | -1.1723456 |
| O00151 | PDZ and LIM domain protein 1 OS=Homo sapiens GN=PDLIM1 PE=1 SV=4 - [PDLI1_HUMAN]                                                                                   | 2.28E-05 | 1.38E-03 | down | -1.7290163 |
| P36957 | Dihydropyridyllysine-residue succinyltransferase component of 2-oxoglutarate dehydrogenase complex, mitochondrial OS=Homo sapiens GN=DLST PE=1 SV=4 - [ODO2_HUMAN] | 1.10E-02 | 3.03E-02 | down | -1.1369902 |
| P48506 | Glutamate--cysteine ligase catalytic subunit OS=Homo sapiens GN=GCLC PE=1 SV=2 - [GSH1_HUMAN]                                                                      | 3.72E-05 | 1.78E-03 | up   | 1.7526379  |
| O00429 | Dynamin-1-like protein OS=Homo sapiens GN=DNM1L PE=1 SV=2 - [DNM1L_HUMAN]                                                                                          | 1.58E-02 | 3.89E-02 | up   | 1.1522093  |
| P06737 | Glycogen phosphorylase, liver form OS=Homo sapiens GN=PYGL PE=1 SV=4 - [PYGL_HUMAN]                                                                                | 4.23E-05 | 1.78E-03 | down | -1.8788105 |
| Q9Y3A5 | Ribosome maturation protein SBDS OS=Homo sapiens GN=SBDS PE=1 SV=4 - [SBDS_HUMAN]                                                                                  | 6.68E-04 | 5.11E-03 | down | -1.3808237 |
| P04179 | Superoxide dismutase [Mn], mitochondrial OS=Homo sapiens GN=SOD2 PE=1 SV=2 - [SODM_HUMAN]                                                                          | 2.47E-03 | 1.13E-02 | up   | 1.3963857  |
| Q9BVK6 | Transmembrane emp24 domain-containing protein 9 OS=Homo sapiens GN=TMED9 PE=1 SV=2 - [TMED9_HUMAN]                                                                 | 3.03E-03 | 1.29E-02 | up   | 1.3050512  |
| O00233 | 26S proteasome non-ATPase regulatory subunit 9 OS=Homo sapiens GN=PSMD9 PE=1 SV=3 - [PSMD9_HUMAN]                                                                  | 5.17E-04 | 4.41E-03 | down | -1.390694  |
| Q08J23 | tRNA (cytosine(34)-C(5))-methyltransferase OS=Homo sapiens GN=NSUN2 PE=1 SV=2 - [NSUN2_HUMAN]                                                                      | 1.19E-02 | 3.22E-02 | down | -1.2152523 |
| P35998 | 26S protease regulatory subunit 7 OS=Homo sapiens GN=PSMC2 PE=1 SV=3 - [PRS7_HUMAN]                                                                                | 1.35E-03 | 7.38E-03 | down | -1.1426486 |
| P27797 | Calreticulin OS=Homo sapiens GN=CALR PE=1 SV=1 - [CALR_HUMAN]                                                                                                      | 4.06E-04 | 3.77E-03 | up   | 1.5843748  |
| O43795 | Unconventional myosin-Ib OS=Homo sapiens GN=MYO1B PE=1 SV=3 - [MYO1B_HUMAN]                                                                                        | 1.52E-04 | 2.44E-03 | down | -1.2396137 |
| P24539 | ATP synthase F(0) complex subunit B1, mitochondrial OS=Homo sapiens GN=ATP5F1 PE=1 SV=2 - [AT5F1_HUMAN]                                                            | 3.09E-04 | 3.39E-03 | down | -1.2738857 |
| Q14204 | Cytoplasmic dynein 1 heavy chain 1 OS=Homo sapiens GN=DYNC1H1 PE=1 SV=5 - [DYHC1_HUMAN]                                                                            | 6.09E-05 | 1.78E-03 | up   | 1.6032346  |
| Q13162 | Peroxiredoxin-4 OS=Homo sapiens GN=PRDX4 PE=1 SV=1 - [PRDX4_HUMAN]                                                                                                 | 4.84E-05 | 1.78E-03 | up   | 1.8027271  |
| Q13200 | 26S proteasome non-ATPase regulatory subunit 2 OS=Homo sapiens GN=PSMD2 PE=1 SV=3 - [PSMD2_HUMAN]                                                                  | 1.34E-02 | 3.47E-02 | down | -1.2142394 |
| Q13057 | Bifunctional coenzyme A synthase OS=Homo sapiens GN=COASY PE=1 SV=4 - [COASY_HUMAN]                                                                                | 2.49E-03 | 1.13E-02 | up   | 1.1592919  |
| P09758 | Tumor-associated calcium signal transducer 2 OS=Homo sapiens GN=TACSTD2 PE=1 SV=3 - [TACD2_HUMAN]                                                                  | 9.11E-03 | 2.65E-02 | down | -1.2121285 |
| Q14152 | Eukaryotic translation initiation factor 3 subunit A OS=Homo sapiens GN=EIF3A PE=1 SV=1 - [EIF3A_HUMAN]                                                            | 3.84E-03 | 1.49E-02 | down | -1.1910186 |
| P41091 | Eukaryotic translation initiation factor 2 subunit 3 OS=Homo sapiens GN=EIF2S3 PE=1 SV=3 - [IF2G_HUMAN]                                                            | 2.29E-04 | 2.87E-03 | down | -1.2338092 |
| P16949 | Stathmin OS=Homo sapiens GN=STMN1 PE=1 SV=3 - [STMN1_HUMAN]                                                                                                        | 5.90E-03 | 1.98E-02 | down | -1.3613175 |
| P22676 | Calretinin OS=Homo sapiens GN=CALB2 PE=2 SV=2 - [CALB2_HUMAN]                                                                                                      | 3.13E-06 | 8.76E-04 | up   | 3.1833932  |

|        |                                                                                                                     |          |          |      |            |
|--------|---------------------------------------------------------------------------------------------------------------------|----------|----------|------|------------|
| Q9BY44 | Eukaryotic translation initiation factor 2A OS=Homo sapiens GN=EIF2A PE=1 SV=3 - [EIF2A_HUMAN]                      | 1.25E-02 | 3.30E-02 | down | -1.2347101 |
| P30838 | Aldehyde dehydrogenase, dimeric NADP-preferring OS=Homo sapiens GN=ALDH3A1 PE=1 SV=3 - [AL3A1_HUMAN]                | 9.71E-06 | 1.36E-03 | up   | 1.8669542  |
| Q15785 | Mitochondrial import receptor subunit TOM34 OS=Homo sapiens GN=TOMM34 PE=1 SV=2 - [TOM34_HUMAN]                     | 1.63E-03 | 8.34E-03 | down | -1.2463759 |
| Q06210 | Glutamine--fructose-6-phosphate aminotransferase [isomerizing] 1 OS=Homo sapiens GN=GFPT1 PE=1 SV=3 - [GFPT1_HUMAN] | 1.21E-03 | 7.05E-03 | up   | 1.3379711  |
| Q13136 | Liprin-alpha-1 OS=Homo sapiens GN=PPFIA1 PE=1 SV=1 - [LIPA1_HUMAN]                                                  | 5.42E-04 | 4.57E-03 | down | -1.3497835 |
| P21964 | Catechol O-methyltransferase OS=Homo sapiens GN=COMT PE=1 SV=2 - [COMT_HUMAN]                                       | 1.37E-02 | 3.52E-02 | up   | 1.3126211  |
| P31689 | DnaJ homolog subfamily A member 1 OS=Homo sapiens GN=DNAJA1 PE=1 SV=2 - [DNJA1_HUMAN]                               | 1.18E-02 | 3.19E-02 | down | -1.3605753 |
| Q9UHX1 | Poly(U)-binding-splicing factor PUF60 OS=Homo sapiens GN=PUF60 PE=1 SV=1 - [PUF60_HUMAN]                            | 8.15E-03 | 2.45E-02 | down | -1.1477194 |
| Q9BT78 | COP9 signalosome complex subunit 4 OS=Homo sapiens GN=COPS4 PE=1 SV=1 - [CSN4_HUMAN]                                | 3.47E-03 | 1.41E-02 | up   | 1.1351424  |
| Q9Y310 | tRNA-splicing ligase RtcB homolog OS=Homo sapiens GN=RTCB PE=1 SV=1 - [RTCB_HUMAN]                                  | 2.17E-02 | 4.93E-02 | up   | 1.1991403  |
| P27105 | Erythrocyte band 7 integral membrane protein OS=Homo sapiens GN=STOM PE=1 SV=3 - [STOM_HUMAN]                       | 1.55E-03 | 8.14E-03 | down | -1.3997545 |
| P51572 | B-cell receptor-associated protein 31 OS=Homo sapiens GN=BCAP31 PE=1 SV=3 - [BAP31_HUMAN]                           | 1.83E-02 | 4.34E-02 | up   | 1.2099215  |
| P61221 | ATP-binding cassette sub-family E member 1 OS=Homo sapiens GN=ABCE1 PE=1 SV=1 - [ABCE1_HUMAN]                       | 2.61E-03 | 1.17E-02 | down | -1.1531037 |
| P63172 | Dynein light chain Tctex-type 1 OS=Homo sapiens GN=DYNLT1 PE=1 SV=1 - [DYLT1_HUMAN]                                 | 1.58E-02 | 3.88E-02 | up   | 1.6481178  |
| P55786 | Puromycin-sensitive aminopeptidase OS=Homo sapiens GN=NPEPPS PE=1 SV=2 - [PSA_HUMAN]                                | 5.44E-03 | 1.88E-02 | up   | 1.1913173  |
| Q16851 | UTP--glucose-1-phosphate uridylyltransferase OS=Homo sapiens GN=UGP2 PE=1 SV=5 - [UGPA_HUMAN]                       | 4.64E-05 | 1.78E-03 | up   | 1.4884177  |
| O95336 | 6-phosphogluconolactonase OS=Homo sapiens GN=PGLS PE=1 SV=2 - [6PGL_HUMAN]                                          | 1.04E-03 | 6.43E-03 | up   | 1.148455   |
| Q15005 | Signal peptidase complex subunit 2 OS=Homo sapiens GN=SPCS2 PE=1 SV=3 - [SPCS2_HUMAN]                               | 4.79E-03 | 1.70E-02 | up   | 1.3009044  |
| Q9Y624 | Junctional adhesion molecule A OS=Homo sapiens GN=F11R PE=1 SV=1 - [JAM1_HUMAN]                                     | 3.31E-04 | 3.50E-03 | up   | 1.5451335  |
| Q96AE4 | Far upstream element-binding protein 1 OS=Homo sapiens GN=FUBP1 PE=1 SV=3 - [FUBP1_HUMAN]                           | 3.97E-03 | 1.53E-02 | down | -1.3270313 |
| P56192 | Methionine--tRNA ligase, cytoplasmic OS=Homo sapiens GN=MARS PE=1 SV=2 - [SYMC_HUMAN]                               | 3.71E-03 | 1.46E-02 | down | -1.137392  |
| P32969 | 60S ribosomal protein L9 OS=Homo sapiens GN=RPL9 PE=1 SV=1 - [RL9_HUMAN]                                            | 5.86E-03 | 1.98E-02 | down | -1.1909722 |
| Q9HA64 | Ketosamine-3-kinase OS=Homo sapiens GN=FN3KRP PE=1 SV=2 - [KT3K_HUMAN]                                              | 7.98E-03 | 2.41E-02 | up   | 1.3307159  |
| P49736 | DNA replication licensing factor MCM2 OS=Homo sapiens GN=MCM2 PE=1 SV=4 - [MCM2_HUMAN]                              | 4.51E-04 | 4.03E-03 | down | -1.5317193 |
| Q9NV17 | ATPase family AAA domain-containing protein 3A OS=Homo sapiens GN=ATAD3A PE=1 SV=2 - [ATD3A_HUMAN]                  | 2.23E-03 | 1.05E-02 | down | -1.5860535 |
| P28074 | Proteasome subunit beta type-5 OS=Homo sapiens GN=PSMB5 PE=1 SV=3 - [PSB5_HUMAN]                                    | 9.95E-04 | 6.23E-03 | down | -1.5448285 |
| P21281 | V-type proton ATPase subunit B, brain isoform OS=Homo sapiens GN=ATP6V1B2 PE=1 SV=3 - [VATB2_HUMAN]                 | 7.79E-04 | 5.55E-03 | up   | 1.5195359  |
| O60547 | GDP-mannose 4,6 dehydratase OS=Homo sapiens GN=GMDS PE=1 SV=1 - [GMDS_HUMAN]                                        | 1.20E-03 | 7.02E-03 | up   | 1.40803    |
| P60228 | Eukaryotic translation initiation factor 3 subunit E OS=Homo sapiens GN=EIF3E PE=1 SV=1 - [EIF3E_HUMAN]             | 7.08E-03 | 2.22E-02 | down | -1.2316507 |
| Q02218 | 2-oxoglutarate dehydrogenase, mitochondrial OS=Homo sapiens GN=OGDH PE=1 SV=3 - [ODO1_HUMAN]                        | 3.68E-03 | 1.46E-02 | down | -1.2107928 |
| P38606 | V-type proton ATPase catalytic subunit A OS=Homo sapiens GN=ATP6V1A PE=1 SV=2 - [VATA_HUMAN]                        | 7.61E-03 | 2.32E-02 | up   | 1.2802314  |
| O95881 | Thioredoxin domain-containing protein 12 OS=Homo sapiens GN=TXNDC12 PE=1 SV=1 - [TXD12_HUMAN]                       | 3.54E-04 | 3.58E-03 | down | -1.6267446 |
| Q5VWZ2 | Lysophospholipase-like protein 1 OS=Homo sapiens GN=LYPLAL1 PE=1 SV=3 - [LYPL1_HUMAN]                               | 9.66E-04 | 6.16E-03 | up   | 1.2498306  |
| P14324 | Farnesyl pyrophosphate synthase OS=Homo sapiens GN=FDPS PE=1 SV=4 - [FPSP_HUMAN]                                    | 1.09E-02 | 3.02E-02 | up   | 1.227648   |

|        |                                                                                                                                       |          |          |      |            |
|--------|---------------------------------------------------------------------------------------------------------------------------------------|----------|----------|------|------------|
| P18206 | Vinculin OS=Homo sapiens GN=VCL PE=1 SV=4 - [VINC_HUMAN]                                                                              | 1.35E-02 | 3.49E-02 | down | -1.2371044 |
| P15374 | Ubiquitin carboxyl-terminal hydrolase isozyme L3 OS=Homo sapiens GN=UCHL3 PE=1 SV=1 - [UCHL3_HUMAN]                                   | 2.02E-02 | 4.67E-02 | up   | 1.2342337  |
| Q15382 | GTP-binding protein Rheb OS=Homo sapiens GN=RHEB PE=1 SV=1 - [RHEB_HUMAN]                                                             | 4.97E-03 | 1.76E-02 | up   | 1.4957985  |
| P15153 | Ras-related C3 botulinum toxin substrate 2 OS=Homo sapiens GN=RAC2 PE=1 SV=1 - [RAC2_HUMAN]                                           | 3.71E-04 | 3.61E-03 | up   | 2.020465   |
| Q9BR76 | Coronin-1B OS=Homo sapiens GN=CORO1B PE=1 SV=1 - [COR1B_HUMAN]                                                                        | 5.38E-03 | 1.88E-02 | up   | 1.1234653  |
| P55263 | Adenosine kinase OS=Homo sapiens GN=ADK PE=1 SV=2 - [ADK_HUMAN]                                                                       | 6.36E-03 | 2.08E-02 | down | -1.3790295 |
| P12081 | Histidine--tRNA ligase, cytoplasmic OS=Homo sapiens GN=HARS PE=1 SV=2 - [SYHC_HUMAN]                                                  | 8.68E-04 | 5.87E-03 | down | -1.2718859 |
| P39748 | Flap endonuclease 1 OS=Homo sapiens GN=FEN1 PE=1 SV=1 - [FEN1_HUMAN]                                                                  | 3.01E-04 | 3.36E-03 | up   | 1.3293201  |
| Q12907 | Vesicular integral-membrane protein VIP36 OS=Homo sapiens GN=LMAN2 PE=1 SV=1 - [LMAN2_HUMAN]                                          | 3.07E-05 | 1.63E-03 | up   | 1.4461673  |
| Q722W4 | Zinc finger CCCH-type antiviral protein 1 OS=Homo sapiens GN=ZC3HAV1 PE=1 SV=3 - [ZCCHV_HUMAN]                                        | 1.50E-04 | 2.44E-03 | down | -1.8808278 |
| Q9Y3F4 | Serine-threonine kinase receptor-associated protein OS=Homo sapiens GN=STRAP PE=1 SV=1 - [STRAP_HUMAN]                                | 3.73E-04 | 3.61E-03 | down | -1.5498998 |
| Q8TC12 | Retinol dehydrogenase 11 OS=Homo sapiens GN=RDH11 PE=1 SV=2 - [RDH11_HUMAN]                                                           | 3.19E-03 | 1.34E-02 | down | -1.3041362 |
| P30043 | Flavin reductase (NADPH) OS=Homo sapiens GN=BLVRB PE=1 SV=3 - [BLVRB_HUMAN]                                                           | 6.34E-04 | 4.98E-03 | up   | 1.7419794  |
| Q03169 | Tumor necrosis factor alpha-induced protein 2 OS=Homo sapiens GN=TNFAIP2 PE=2 SV=2 - [TNAP2_HUMAN]                                    | 4.31E-05 | 1.78E-03 | up   | 2.116569   |
| P30405 | Peptidyl-prolyl cis-trans isomerase F, mitochondrial OS=Homo sapiens GN=PPIF PE=1 SV=1 - [PPIF_HUMAN]                                 | 4.55E-03 | 1.66E-02 | down | -1.2422752 |
| O95831 | Apoptosis-inducing factor 1, mitochondrial OS=Homo sapiens GN=AIFM1 PE=1 SV=1 - [AIFM1_HUMAN]                                         | 5.82E-03 | 1.98E-02 | up   | 1.2126722  |
| P62942 | Peptidyl-prolyl cis-trans isomerase FKBP1A OS=Homo sapiens GN=FKBP1A PE=1 SV=2 - [FKB1A_HUMAN]                                        | 1.28E-02 | 3.36E-02 | up   | 1.3899764  |
| Q9Y376 | Calcium-binding protein 39 OS=Homo sapiens GN=CAB39 PE=1 SV=1 - [CAB39_HUMAN]                                                         | 1.19E-03 | 6.95E-03 | down | -1.4694296 |
| P13995 | Bifunctional methylenetetrahydrofolate dehydrogenase/cyclohydrolase, mitochondrial OS=Homo sapiens GN=MTHFD2 PE=1 SV=2 - [MTDC_HUMAN] | 7.02E-03 | 2.22E-02 | down | -1.2777969 |
| P36871 | Phosphoglucosmutase-1 OS=Homo sapiens GN=PGM1 PE=1 SV=3 - [PGM1_HUMAN]                                                                | 1.53E-04 | 2.44E-03 | down | -1.757677  |
| Q14258 | E3 ubiquitin/ISG15 ligase TRIM25 OS=Homo sapiens GN=TRIM25 PE=1 SV=2 - [TRI25_HUMAN]                                                  | 1.43E-04 | 2.43E-03 | up   | 1.6760329  |
| Q724W1 | L-xylulose reductase OS=Homo sapiens GN=DCXR PE=1 SV=2 - [DCXR_HUMAN]                                                                 | 2.76E-04 | 3.20E-03 | up   | 1.5713593  |
| Q9Y262 | Eukaryotic translation initiation factor 3 subunit L OS=Homo sapiens GN=EIF3L PE=1 SV=1 - [EIF3L_HUMAN]                               | 8.17E-03 | 2.45E-02 | down | -1.1597643 |
| Q96RS6 | NudC domain-containing protein 1 OS=Homo sapiens GN=NUDCD1 PE=1 SV=2 - [NUDC1_HUMAN]                                                  | 1.85E-03 | 9.01E-03 | up   | 1.1416517  |
| P48637 | Glutathione synthetase OS=Homo sapiens GN=GSS PE=1 SV=1 - [GSHB_HUMAN]                                                                | 1.20E-02 | 3.23E-02 | down | -1.2317704 |
| Q00059 | Transcription factor A, mitochondrial OS=Homo sapiens GN=TFAM PE=1 SV=1 - [TFAM_HUMAN]                                                | 1.86E-02 | 4.38E-02 | down | -1.1820513 |
| Q03252 | Lamin-B2 OS=Homo sapiens GN=LMNB2 PE=1 SV=4 - [LMNB2_HUMAN]                                                                           | 6.05E-03 | 2.03E-02 | down | -1.1603619 |
| O14933 | Ubiquitin/ISG15-conjugating enzyme E2 L6 OS=Homo sapiens GN=UBE2L6 PE=1 SV=4 - [UB2L6_HUMAN]                                          | 3.24E-03 | 1.34E-02 | up   | 1.6019629  |
| P30519 | Heme oxygenase 2 OS=Homo sapiens GN=HMOX2 PE=1 SV=2 - [HMOX2_HUMAN]                                                                   | 2.17E-02 | 4.93E-02 | up   | 1.1141288  |
| O95373 | Importin-7 OS=Homo sapiens GN=IPO7 PE=1 SV=1 - [IPO7_HUMAN]                                                                           | 1.02E-02 | 2.87E-02 | down | -1.1922915 |
| Q96DI7 | U5 small nuclear ribonucleoprotein 40 kDa protein OS=Homo sapiens GN=SNRNP40 PE=1 SV=1 - [SNR40_HUMAN]                                | 1.81E-03 | 8.88E-03 | down | -1.3128988 |
| P26583 | High mobility group protein B2 OS=Homo sapiens GN=HMGB2 PE=1 SV=2 - [HMGB2_HUMAN]                                                     | 1.26E-02 | 3.34E-02 | up   | 1.3599427  |
| Q9Y5M8 | Signal recognition particle receptor subunit beta OS=Homo sapiens GN=SRPRB PE=1 SV=3 - [SRPRB_HUMAN]                                  | 3.88E-04 | 3.69E-03 | up   | 1.4659659  |
| Q96HS1 | Serine/threonine-protein phosphatase PGAM5, mitochondrial OS=Homo sapiens GN=PGAM5 PE=1 SV=2 - [PGAM5_HUMAN]                          | 3.57E-04 | 3.59E-03 | down | -1.2412837 |

|        |                                                                                                                                   |          |          |      |            |
|--------|-----------------------------------------------------------------------------------------------------------------------------------|----------|----------|------|------------|
| Q5JTV8 | Torsin-1A-interacting protein 1 OS=Homo sapiens GN=TOR1AIP1 PE=1 SV=2 - [TOIP1_HUMAN]                                             | 1.16E-02 | 3.15E-02 | up   | 1.2489173  |
| Q92820 | Gamma-glutamyl hydrolase OS=Homo sapiens GN=GGH PE=1 SV=2 - [GGH_HUMAN]                                                           | 7.11E-05 | 1.86E-03 | up   | 3.1326673  |
| P11172 | Uridine 5'-monophosphate synthase OS=Homo sapiens GN=UMPS PE=1 SV=1 - [UMPS_HUMAN]                                                | 8.03E-04 | 5.65E-03 | up   | 1.3767604  |
| Q9NQR4 | Omega-amidase NIT2 OS=Homo sapiens GN=NIT2 PE=1 SV=1 - [NIT2_HUMAN]                                                               | 1.78E-03 | 8.86E-03 | up   | 1.1305518  |
| Q9UL25 | Ras-related protein Rab-21 OS=Homo sapiens GN=RAB21 PE=1 SV=3 - [RAB21_HUMAN]                                                     | 8.73E-03 | 2.58E-02 | up   | 1.1660937  |
| P35270 | Sepiapterin reductase OS=Homo sapiens GN=SPR PE=1 SV=1 - [SPRE_HUMAN]                                                             | 9.94E-03 | 2.80E-02 | up   | 1.4115462  |
| P15121 | Aldose reductase OS=Homo sapiens GN=AKR1B1 PE=1 SV=3 - [ALDR_HUMAN]                                                               | 1.68E-03 | 8.49E-03 | up   | 1.3091357  |
| Q13247 | Serine/arginine-rich splicing factor 6 OS=Homo sapiens GN=SRSF6 PE=1 SV=2 - [SRSF6_HUMAN]                                         | 1.72E-02 | 4.13E-02 | down | -1.1612135 |
| O75533 | Splicing factor 3B subunit 1 OS=Homo sapiens GN=SF3B1 PE=1 SV=3 - [SF3B1_HUMAN]                                                   | 1.06E-04 | 2.07E-03 | down | -1.3605387 |
| Q9NSD9 | Phenylalanine--tRNA ligase beta subunit OS=Homo sapiens GN=FARSB PE=1 SV=3 - [SYFB_HUMAN]                                         | 1.01E-05 | 1.36E-03 | down | -1.247156  |
| Q727H5 | Transmembrane emp24 domain-containing protein 4 OS=Homo sapiens GN=TMED4 PE=1 SV=1 - [TMED4_HUMAN]                                | 3.20E-03 | 1.34E-02 | down | -1.314663  |
| O95299 | NADH dehydrogenase [ubiquinone] 1 alpha subcomplex subunit 10, mitochondrial OS=Homo sapiens GN=NDUFA10 PE=1 SV=1 - [NDUAA_HUMAN] | 1.04E-02 | 2.90E-02 | up   | 1.2588991  |
| Q92599 | Septin-8 OS=Homo sapiens GN=SEPT8 PE=1 SV=4 - [SEPT8_HUMAN]                                                                       | 2.20E-02 | 4.97E-02 | up   | 1.1200876  |
| Q96IU4 | Protein ABHD14B OS=Homo sapiens GN=ABHD14B PE=1 SV=1 - [ABHEB_HUMAN]                                                              | 2.18E-05 | 1.36E-03 | up   | 1.8066789  |
| Q13148 | TAR DNA-binding protein 43 OS=Homo sapiens GN=TARDBP PE=1 SV=1 - [TADBP_HUMAN]                                                    | 1.82E-02 | 4.32E-02 | down | -1.3657229 |
| P26440 | Isovaleryl-CoA dehydrogenase, mitochondrial OS=Homo sapiens GN=IVD PE=1 SV=1 - [IVD_HUMAN]                                        | 1.61E-04 | 2.44E-03 | up   | 1.5149204  |
| P20073 | Annexin A7 OS=Homo sapiens GN=ANXA7 PE=1 SV=3 - [ANXA7_HUMAN]                                                                     | 7.69E-03 | 2.34E-02 | down | -1.1948313 |
| Q99436 | Proteasome subunit beta type-7 OS=Homo sapiens GN=PSMB7 PE=1 SV=1 - [PSB7_HUMAN]                                                  | 1.65E-02 | 4.03E-02 | down | -1.14481   |
| Q99447 | Ethanolamine-phosphate cytidyltransferase OS=Homo sapiens GN=PCYT2 PE=1 SV=1 - [PCY2_HUMAN]                                       | 3.90E-04 | 3.69E-03 | up   | 1.9419681  |
| P24752 | Acetyl-CoA acetyltransferase, mitochondrial OS=Homo sapiens GN=ACAT1 PE=1 SV=1 - [THIL_HUMAN]                                     | 2.01E-04 | 2.73E-03 | up   | 1.4854594  |
| P36542 | ATP synthase subunit gamma, mitochondrial OS=Homo sapiens GN=ATP5C1 PE=1 SV=1 - [ATPG_HUMAN]                                      | 7.54E-05 | 1.91E-03 | down | -1.4592322 |
| P62714 | Serine/threonine-protein phosphatase 2A catalytic subunit beta isoform OS=Homo sapiens GN=PPP2CB PE=1 SV=1 - [PP2AB_HUMAN]        | 1.15E-03 | 6.83E-03 | up   | 1.2826419  |
| P33992 | DNA replication licensing factor MCM5 OS=Homo sapiens GN=MCM5 PE=1 SV=5 - [MCM5_HUMAN]                                            | 1.66E-04 | 2.44E-03 | down | -1.2432284 |
| Q16531 | DNA damage-binding protein 1 OS=Homo sapiens GN=DDB1 PE=1 SV=1 - [DDB1_HUMAN]                                                     | 1.82E-04 | 2.60E-03 | up   | 1.2106942  |
| P19367 | Hexokinase-1 OS=Homo sapiens GN=HK1 PE=1 SV=3 - [HXK1_HUMAN]                                                                      | 5.34E-03 | 1.87E-02 | down | -1.2471868 |
| P12429 | Annexin A3 OS=Homo sapiens GN=ANXA3 PE=1 SV=3 - [ANXA3_HUMAN]                                                                     | 9.44E-03 | 2.71E-02 | up   | 1.108245   |
| Q96P70 | Importin-9 OS=Homo sapiens GN=IPO9 PE=1 SV=3 - [IPO9_HUMAN]                                                                       | 1.68E-02 | 4.06E-02 | up   | 1.1196529  |
| P45954 | Short/branched chain specific acyl-CoA dehydrogenase, mitochondrial OS=Homo sapiens GN=ACADSB PE=1 SV=1 - [ACDSB_HUMAN]           | 3.90E-05 | 1.78E-03 | up   | 1.1744773  |
| Q9Y5B9 | FACT complex subunit SPT16 OS=Homo sapiens GN=SUPT16H PE=1 SV=1 - [SP16H_HUMAN]                                                   | 1.46E-02 | 3.68E-02 | down | -1.176356  |
| Q86W42 | THO complex subunit 6 homolog OS=Homo sapiens GN=THOC6 PE=1 SV=1 - [THOC6_HUMAN]                                                  | 1.74E-02 | 4.15E-02 | up   | 1.2216566  |
| P35222 | Catenin beta-1 OS=Homo sapiens GN=CTNNB1 PE=1 SV=1 - [CTNB1_HUMAN]                                                                | 2.00E-04 | 2.73E-03 | down | -1.1231141 |
| P52292 | Importin subunit alpha-1 OS=Homo sapiens GN=KPNA2 PE=1 SV=1 - [IMA1_HUMAN]                                                        | 5.66E-04 | 4.64E-03 | down | -1.3627762 |
| Q9H2U2 | Inorganic pyrophosphatase 2, mitochondrial OS=Homo sapiens GN=PPA2 PE=1 SV=2 - [IPYR2_HUMAN]                                      | 3.58E-03 | 1.43E-02 | up   | 1.383827   |
| P08754 | Guanine nucleotide-binding protein G(k) subunit alpha OS=Homo sapiens GN=GNAI3 PE=1 SV=3 - [GNAI3_HUMAN]                          | 5.07E-04 | 4.38E-03 | down | -1.5921568 |

|        |                                                                                                                    |          |          |      |            |
|--------|--------------------------------------------------------------------------------------------------------------------|----------|----------|------|------------|
| P13861 | cAMP-dependent protein kinase type II-alpha regulatory subunit OS=Homo sapiens GN=PRKAR2A PE=1 SV=2 - [KAP2_HUMAN] | 2.99E-03 | 1.28E-02 | down | -1.5732346 |
| P13928 | Annexin A8 OS=Homo sapiens GN=ANXA8 PE=1 SV=3 - [ANXA8_HUMAN]                                                      | 6.20E-04 | 4.92E-03 | down | -1.3408294 |
| Q8TEX9 | Importin-4 OS=Homo sapiens GN=IPO4 PE=1 SV=2 - [IPO4_HUMAN]                                                        | 2.20E-02 | 4.97E-02 | down | -1.1967877 |
| P07205 | Phosphoglycerate kinase 2 OS=Homo sapiens GN=PGK2 PE=1 SV=3 - [PGK2_HUMAN]                                         | 1.29E-02 | 3.38E-02 | up   | 1.2785542  |
| P01116 | GTPase KRas OS=Homo sapiens GN=KRAS PE=1 SV=1 - [RASK_HUMAN]                                                       | 1.09E-02 | 3.02E-02 | down | -1.2984385 |
| Q16563 | Synaptophysin-like protein 1 OS=Homo sapiens GN=SYPL1 PE=1 SV=1 - [SYPL1_HUMAN]                                    | 2.06E-03 | 9.82E-03 | up   | 1.2860348  |
| Q9NWW4 | UPF0587 protein C1orf123 OS=Homo sapiens GN=C1orf123 PE=1 SV=1 - [CA123_HUMAN]                                     | 1.29E-03 | 7.28E-03 | down | -1.3113347 |
| O75340 | Programmed cell death protein 6 OS=Homo sapiens GN=PDCD6 PE=1 SV=1 - [PDCD6_HUMAN]                                 | 4.91E-04 | 4.30E-03 | down | -2.1625555 |
| P34896 | Serine hydroxymethyltransferase, cytosolic OS=Homo sapiens GN=SHMT1 PE=1 SV=1 - [GLYC_HUMAN]                       | 1.24E-03 | 7.10E-03 | down | -1.3914781 |
| O75947 | ATP synthase subunit d, mitochondrial OS=Homo sapiens GN=ATP5H PE=1 SV=3 - [ATP5H_HUMAN]                           | 7.32E-04 | 5.38E-03 | down | -1.2155179 |
| Q7L2H7 | Eukaryotic translation initiation factor 3 subunit M OS=Homo sapiens GN=EIF3M PE=1 SV=1 - [EIF3M_HUMAN]            | 8.78E-04 | 5.89E-03 | down | -1.139839  |
| Q14512 | Fibroblast growth factor-binding protein 1 OS=Homo sapiens GN=FGFBP1 PE=1 SV=1 - [FGFP1_HUMAN]                     | 2.12E-02 | 4.84E-02 | up   | 1.4420913  |
| Q86UP2 | Kinectin OS=Homo sapiens GN=KTN1 PE=1 SV=1 - [KTN1_HUMAN]                                                          | 1.60E-04 | 2.44E-03 | down | -1.4343544 |
| O96019 | Actin-like protein 6A OS=Homo sapiens GN=ACTL6A PE=1 SV=1 - [ACL6A_HUMAN]                                          | 9.03E-04 | 6.01E-03 | down | -1.2459966 |
| O95861 | 3'(2'),5'-bisphosphate nucleotidase 1 OS=Homo sapiens GN=BPNT1 PE=1 SV=1 - [BPNT1_HUMAN]                           | 3.25E-04 | 3.46E-03 | up   | 1.7618325  |
| Q92616 | eIF-2-alpha kinase activator GCN1 OS=Homo sapiens GN=GCN1 PE=1 SV=6 - [GCN1_HUMAN]                                 | 4.19E-04 | 3.84E-03 | down | -1.2707899 |
| Q9Y678 | Coatomer subunit gamma-1 OS=Homo sapiens GN=COPG1 PE=1 SV=1 - [COPG1_HUMAN]                                        | 9.68E-02 | 2.76E-02 | up   | 1.1939502  |
| Q08380 | Galectin-3-binding protein OS=Homo sapiens GN=LGALS3BP PE=1 SV=1 - [LG3BP_HUMAN]                                   | 2.14E-04 | 2.81E-03 | up   | 1.935903   |
| Q14558 | Phosphoribosyl pyrophosphate synthase-associated protein 1 OS=Homo sapiens GN=PRPSAP1 PE=1 SV=2 - [KPRA_HUMAN]     | 3.39E-04 | 3.55E-03 | up   | 1.3550591  |
| Q13126 | S-methyl-5'-thioadenosine phosphorylase OS=Homo sapiens GN=MTAP PE=1 SV=2 - [MTAP_HUMAN]                           | 5.82E-05 | 1.78E-03 | up   | 1.3452346  |
| P22059 | Oxysterol-binding protein 1 OS=Homo sapiens GN=OSBP PE=1 SV=1 - [OSBP1_HUMAN]                                      | 1.81E-02 | 4.31E-02 | up   | 1.2997214  |
| P30566 | Adenylosuccinate lyase OS=Homo sapiens GN=ADSL PE=1 SV=2 - [PUR8_HUMAN]                                            | 6.61E-03 | 2.14E-02 | down | -1.1616874 |
| Q15029 | 116 kDa U5 small nuclear ribonucleoprotein component OS=Homo sapiens GN=EFTUD2 PE=1 SV=1 - [U5S1_HUMAN]            | 1.52E-02 | 3.80E-02 | down | -1.109069  |
| Q9Y446 | Plakophilin-3 OS=Homo sapiens GN=PKP3 PE=1 SV=1 - [PKP3_HUMAN]                                                     | 2.60E-04 | 3.11E-03 | down | -1.6296604 |
| P33991 | DNA replication licensing factor MCM4 OS=Homo sapiens GN=MCM4 PE=1 SV=5 - [MCM4_HUMAN]                             | 1.58E-04 | 2.44E-03 | down | -1.4498371 |
| Q12797 | Aspartyl/asparaginyl beta-hydroxylase OS=Homo sapiens GN=ASPH PE=1 SV=3 - [ASPH_HUMAN]                             | 5.06E-05 | 1.78E-03 | up   | 1.4420688  |
| P12532 | Creatine kinase U-type, mitochondrial OS=Homo sapiens GN=CKMT1A PE=1 SV=1 - [KCRU_HUMAN]                           | 1.91E-06 | 8.34E-04 | up   | 3.3859243  |
| Q9H307 | Pinin OS=Homo sapiens GN=PNN PE=1 SV=4 - [PININ_HUMAN]                                                             | 8.10E-03 | 2.44E-02 | down | -1.192626  |
| P53007 | Tricarboxylate transport protein, mitochondrial OS=Homo sapiens GN=SLC25A1 PE=1 SV=2 - [TXTP_HUMAN]                | 4.00E-04 | 3.74E-03 | up   | 1.2346582  |
| Q9Y490 | Talin-1 OS=Homo sapiens GN=TLN1 PE=1 SV=3 - [TLN1_HUMAN]                                                           | 3.53E-03 | 1.42E-02 | down | -1.1710095 |
| Q9Y295 | Developmentally-regulated GTP-binding protein 1 OS=Homo sapiens GN=DRG1 PE=1 SV=1 - [DRG1_HUMAN]                   | 1.05E-03 | 6.45E-03 | down | -1.2131886 |
| Q13283 | Ras GTPase-activating protein-binding protein 1 OS=Homo sapiens GN=G3BP1 PE=1 SV=1 - [G3BP1_HUMAN]                 | 1.06E-02 | 2.93E-02 | down | -1.1862748 |
| Q6P2Q9 | Pre-mRNA-processing-splicing factor 8 OS=Homo sapiens GN=PRPF8 PE=1 SV=2 - [PRP8_HUMAN]                            | 1.13E-03 | 6.82E-03 | down | -1.2123522 |
| Q00325 | Phosphate carrier protein, mitochondrial OS=Homo sapiens GN=SLC25A3 PE=1 SV=2 - [MPCP_HUMAN]                       | 1.14E-02 | 3.12E-02 | up   | 1.1472305  |

|        |                                                                                                                  |          |          |      |            |
|--------|------------------------------------------------------------------------------------------------------------------|----------|----------|------|------------|
| Q15393 | Splicing factor 3B subunit 3 OS=Homo sapiens GN=SF3B3 PE=1 SV=4 - [SF3B3_HUMAN]                                  | 1.72E-02 | 4.13E-02 | down | -1.1477252 |
| Q9Y320 | Thioredoxin-related transmembrane protein 2 OS=Homo sapiens GN=TMX2 PE=1 SV=1 - [TMX2_HUMAN]                     | 6.58E-04 | 5.10E-03 | up   | 1.483777   |
| P28062 | Proteasome subunit beta type-8 OS=Homo sapiens GN=PSMB8 PE=1 SV=3 - [PSB8_HUMAN]                                 | 1.18E-04 | 2.15E-03 | up   | 1.6555768  |
| P09622 | Dihydrolipoyl dehydrogenase, mitochondrial OS=Homo sapiens GN=DLD PE=1 SV=2 - [DLDH_HUMAN]                       | 1.64E-05 | 1.36E-03 | up   | 1.3070242  |
| Q9NZM1 | Myoferlin OS=Homo sapiens GN=MYOF PE=1 SV=1 - [MYOF_HUMAN]                                                       | 6.07E-05 | 1.78E-03 | down | -1.2412878 |
| P49321 | Nuclear autoantigenic sperm protein OS=Homo sapiens GN=NASP PE=1 SV=2 - [NASP_HUMAN]                             | 3.48E-03 | 1.41E-02 | down | -1.6916473 |
| P48147 | Prolyl endopeptidase OS=Homo sapiens GN=PREP PE=1 SV=2 - [PPCE_HUMAN]                                            | 6.69E-03 | 2.15E-02 | up   | 1.1596283  |
| P00966 | Argininosuccinate synthase OS=Homo sapiens GN=ASS1 PE=1 SV=2 - [ASSY_HUMAN]                                      | 4.41E-05 | 1.78E-03 | up   | 2.498901   |
| O15067 | Phosphoribosylformylglycinamide synthase OS=Homo sapiens GN=PFAS PE=1 SV=4 - [PUR4_HUMAN]                        | 3.37E-03 | 1.39E-02 | down | -1.4083506 |
| Q15257 | Serine/threonine-protein phosphatase 2A activator OS=Homo sapiens GN=PTPA PE=1 SV=3 - [PTPA_HUMAN]               | 1.51E-02 | 3.78E-02 | up   | 1.2398322  |
| P42224 | Signal transducer and activator of transcription 1-alpha/beta OS=Homo sapiens GN=STAT1 PE=1 SV=2 - [STAT1_HUMAN] | 1.33E-02 | 3.46E-02 | down | -1.1049707 |
| P50416 | Carnitine O-palmitoyltransferase 1, liver isoform OS=Homo sapiens GN=CPT1A PE=1 SV=2 - [CPT1A_HUMAN]             | 4.26E-03 | 1.61E-02 | up   | 1.353562   |
| P41252 | Isoleucine--tRNA ligase, cytoplasmic OS=Homo sapiens GN=IARS PE=1 SV=2 - [SYIC_HUMAN]                            | 2.52E-03 | 1.14E-02 | up   | 1.4402844  |
| Q9P035 | Very-long-chain (3R)-3-hydroxyacyl-CoA dehydratase 3 OS=Homo sapiens GN=HACD3 PE=1 SV=2 - [HACD3_HUMAN]          | 3.75E-03 | 1.47E-02 | up   | 1.4539803  |
| Q9BX40 | Protein LSM14 homolog B OS=Homo sapiens GN=LSM14B PE=1 SV=1 - [LS14B_HUMAN]                                      | 1.30E-02 | 3.41E-02 | up   | 1.4748756  |
| P50897 | Palmitoyl-protein thioesterase 1 OS=Homo sapiens GN=PPT1 PE=1 SV=1 - [PPT1_HUMAN]                                | 1.35E-02 | 3.49E-02 | down | -1.321179  |
| Q722K6 | Endoplasmic reticulum metalloproteinase 1 OS=Homo sapiens GN=ERMP1 PE=1 SV=2 - [ERMP1_HUMAN]                     | 8.34E-03 | 2.50E-02 | up   | 1.1831948  |
| P18031 | Tyrosine-protein phosphatase non-receptor type 1 OS=Homo sapiens GN=PTPN1 PE=1 SV=1 - [PTN1_HUMAN]               | 5.80E-03 | 1.98E-02 | up   | 1.2737365  |
| P47755 | F-actin-capping protein subunit alpha-2 OS=Homo sapiens GN=CAPZA2 PE=1 SV=3 - [CAZA2_HUMAN]                      | 1.50E-04 | 2.44E-03 | up   | 1.701005   |
| Q99439 | Calponin-2 OS=Homo sapiens GN=CNN2 PE=1 SV=4 - [CNN2_HUMAN]                                                      | 1.62E-04 | 2.44E-03 | down | -2.8696566 |
| O75964 | ATP synthase subunit g, mitochondrial OS=Homo sapiens GN=ATP5L PE=1 SV=3 - [ATP5L_HUMAN]                         | 1.22E-02 | 3.26E-02 | down | -1.3232837 |
| O43291 | Kunitz-type protease inhibitor 2 OS=Homo sapiens GN=SPINT2 PE=1 SV=2 - [SPIT2_HUMAN]                             | 4.22E-03 | 1.60E-02 | up   | 1.1236874  |
| O75475 | PC4 and SFRS1-interacting protein OS=Homo sapiens GN=PSIP1 PE=1 SV=1 - [PSIP1_HUMAN]                             | 7.64E-05 | 1.91E-03 | down | -2.1883593 |
| P30443 | HLA class I histocompatibility antigen, A-1 alpha chain OS=Homo sapiens GN=HLA-A PE=1 SV=1 - [1A01_HUMAN]        | 3.73E-04 | 3.61E-03 | up   | 1.4614594  |
| Q9BUL8 | Programmed cell death protein 10 OS=Homo sapiens GN=PDCD10 PE=1 SV=1 - [PDC10_HUMAN]                             | 8.06E-03 | 2.44E-02 | up   | 1.1784003  |
| P09525 | Annexin A4 OS=Homo sapiens GN=ANXA4 PE=1 SV=4 - [ANXA4_HUMAN]                                                    | 2.15E-04 | 2.81E-03 | up   | 1.8130257  |
| Q56VL3 | OCIA domain-containing protein 2 OS=Homo sapiens GN=OCIAD2 PE=1 SV=1 - [OCAD2_HUMAN]                             | 1.53E-02 | 3.81E-02 | up   | 1.549294   |
| Q8N884 | Cyclic GMP-AMP synthase OS=Homo sapiens GN=MB21D1 PE=1 SV=2 - [CGAS_HUMAN]                                       | 5.43E-04 | 4.57E-03 | down | -1.2495068 |
| P48507 | Glutamate--cysteine ligase regulatory subunit OS=Homo sapiens GN=GCLM PE=1 SV=1 - [GSH0_HUMAN]                   | 1.37E-02 | 3.53E-02 | down | -1.1450833 |
| O94826 | Mitochondrial import receptor subunit TOM70 OS=Homo sapiens GN=TOMM70 PE=1 SV=1 - [TOM70_HUMAN]                  | 7.40E-03 | 2.27E-02 | up   | 1.1188831  |
| Q8WWM7 | Ataxin-2-like protein OS=Homo sapiens GN=ATXN2L PE=1 SV=2 - [ATX2L_HUMAN]                                        | 1.19E-02 | 3.21E-02 | down | -1.1336836 |
| Q96TA1 | Niban-like protein 1 OS=Homo sapiens GN=FAM129B PE=1 SV=3 - [NIBL1_HUMAN]                                        | 2.18E-04 | 2.81E-03 | up   | 2.2896135  |
| Q9Y394 | Dehydrogenase/reductase SDR family member 7 OS=Homo sapiens GN=DHRS7 PE=1 SV=1 - [DHRS7_HUMAN]                   | 9.43E-04 | 6.11E-03 | up   | 1.1681348  |
| P53621 | Coatomer subunit alpha OS=Homo sapiens GN=COPA PE=1 SV=2 - [COPA_HUMAN]                                          | 1.29E-02 | 3.39E-02 | up   | 1.1597196  |



|        |                                                                                                            |          |          |      |            |
|--------|------------------------------------------------------------------------------------------------------------|----------|----------|------|------------|
| Q9UKZ1 | CCR4-NOT transcription complex subunit 11 OS=Homo sapiens GN=CNOT11 PE=1 SV=1 - [CNO11_HUMAN]              | 2.13E-02 | 4.85E-02 | up   | 1.2121085  |
| Q15050 | Ribosome biogenesis regulatory protein homolog OS=Homo sapiens GN=RRS1 PE=1 SV=2 - [RRS1_HUMAN]            | 4.57E-03 | 1.66E-02 | up   | 1.3037481  |
| P21283 | V-type proton ATPase subunit C 1 OS=Homo sapiens GN=ATP6V1C1 PE=1 SV=4 - [VATC1_HUMAN]                     | 1.71E-03 | 8.55E-03 | up   | 1.450572   |
| Q14498 | RNA-binding protein 39 OS=Homo sapiens GN=RBM39 PE=1 SV=2 - [RBM39_HUMAN]                                  | 8.25E-04 | 5.71E-03 | down | -1.2205482 |
| P23921 | Ribonucleoside-diphosphate reductase large subunit OS=Homo sapiens GN=RRM1 PE=1 SV=1 - [RIR1_HUMAN]        | 1.53E-02 | 3.81E-02 | down | -1.4626693 |
| Q16222 | UDP-N-acetylhexosamine pyrophosphorylase OS=Homo sapiens GN=UAP1 PE=1 SV=3 - [UAP1_HUMAN]                  | 2.91E-03 | 1.27E-02 | down | -1.4034836 |
| Q9BV19 | Uncharacterized protein C1orf50 OS=Homo sapiens GN=C1orf50 PE=1 SV=2 - [CA050_HUMAN]                       | 1.30E-03 | 7.31E-03 | down | -1.3427149 |
| Q13724 | Mannosyl-oligosaccharide glucosidase OS=Homo sapiens GN=MOGS PE=1 SV=5 - [MOGS_HUMAN]                      | 9.50E-04 | 6.11E-03 | up   | 1.4345765  |
| P14550 | Alcohol dehydrogenase [NADP(+)] OS=Homo sapiens GN=AKR1A1 PE=1 SV=3 - [AK1A1_HUMAN]                        | 2.21E-03 | 1.04E-02 | down | -1.3957207 |
| Q13547 | Histone deacetylase 1 OS=Homo sapiens GN=HDAC1 PE=1 SV=1 - [HDAC1_HUMAN]                                   | 1.43E-03 | 7.73E-03 | down | -1.342396  |
| Q15645 | Pachytene checkpoint protein 2 homolog OS=Homo sapiens GN=TRIP13 PE=1 SV=2 - [PCH2_HUMAN]                  | 1.56E-04 | 2.44E-03 | down | -1.3168436 |
| O60716 | Catenin delta-1 OS=Homo sapiens GN=CTNND1 PE=1 SV=1 - [CTND1_HUMAN]                                        | 1.10E-02 | 3.03E-02 | up   | 1.1260769  |
| Q86TX2 | Acyl-coenzyme A thioesterase 1 OS=Homo sapiens GN=ACOT1 PE=1 SV=1 - [ACOT1_HUMAN]                          | 7.14E-03 | 2.23E-02 | up   | 1.2569525  |
| Q3LXA3 | Triokinase/FMN cyclase OS=Homo sapiens GN=TKFC PE=1 SV=2 - [TKFC_HUMAN]                                    | 8.49E-05 | 1.93E-03 | up   | 1.2506938  |
| P21291 | Cysteine and glycine-rich protein 1 OS=Homo sapiens GN=CSRP1 PE=1 SV=3 - [CSRP1_HUMAN]                     | 6.90E-04 | 5.21E-03 | up   | 1.6530378  |
| P51809 | Vesicle-associated membrane protein 7 OS=Homo sapiens GN=VAMP7 PE=1 SV=3 - [VAMP7_HUMAN]                   | 4.54E-03 | 1.66E-02 | down | -1.2780358 |
| P18463 | HLA class I histocompatibility antigen, B-37 alpha chain OS=Homo sapiens GN=HLA-B PE=1 SV=1 - [1B37_HUMAN] | 5.91E-05 | 1.78E-03 | up   | 2.1537585  |
| O00159 | Unconventional myosin-1c OS=Homo sapiens GN=MYO1C PE=1 SV=4 - [MYO1C_HUMAN]                                | 5.05E-03 | 1.78E-02 | down | -1.3109862 |
| P46108 | Adapter molecule crk OS=Homo sapiens GN=CRK PE=1 SV=2 - [CRK_HUMAN]                                        | 1.25E-02 | 3.32E-02 | down | -1.2291358 |
| P23919 | Thymidylate kinase OS=Homo sapiens GN=DTYMK PE=1 SV=4 - [KTHY_HUMAN]                                       | 4.63E-05 | 1.78E-03 | down | -1.6315895 |
| Q93009 | Ubiquitin carboxyl-terminal hydrolase 7 OS=Homo sapiens GN=USP7 PE=1 SV=2 - [UBP7_HUMAN]                   | 2.47E-03 | 1.13E-02 | up   | 1.3057977  |
| P50995 | Annexin A11 OS=Homo sapiens GN=ANXA11 PE=1 SV=1 - [ANX11_HUMAN]                                            | 1.10E-03 | 6.70E-03 | up   | 1.2172781  |
| Q96A33 | Coiled-coil domain-containing protein 47 OS=Homo sapiens GN=CCDC47 PE=1 SV=1 - [CCD47_HUMAN]               | 1.17E-04 | 2.15E-03 | up   | 1.4912884  |
| Q9BS26 | Endoplasmic reticulum resident protein 44 OS=Homo sapiens GN=ERP44 PE=1 SV=1 - [ERP44_HUMAN]               | 2.65E-03 | 1.19E-02 | up   | 1.3178169  |
| O00203 | AP-3 complex subunit beta-1 OS=Homo sapiens GN=AP3B1 PE=1 SV=3 - [AP3B1_HUMAN]                             | 6.88E-03 | 2.19E-02 | up   | 1.2140434  |
| Q14914 | Prostaglandin reductase 1 OS=Homo sapiens GN=PTGR1 PE=1 SV=2 - [PTGR1_HUMAN]                               | 9.36E-06 | 1.36E-03 | down | -1.5355291 |
| Q9BQ52 | Zinc phosphodiesterase ELAC protein 2 OS=Homo sapiens GN=ELAC2 PE=1 SV=2 - [RNZ2_HUMAN]                    | 5.20E-03 | 1.83E-02 | down | -1.6913863 |
| O75494 | Serine/arginine-rich splicing factor 10 OS=Homo sapiens GN=SRSF10 PE=1 SV=1 - [SRS10_HUMAN]                | 5.83E-03 | 1.98E-02 | down | -1.3410664 |
| Q9UHB6 | LIM domain and actin-binding protein 1 OS=Homo sapiens GN=LIMA1 PE=1 SV=1 - [LIMA1_HUMAN]                  | 1.44E-02 | 3.66E-02 | down | -1.5125822 |
| P09874 | Poly [ADP-ribose] polymerase 1 OS=Homo sapiens GN=PARP1 PE=1 SV=4 - [PARP1_HUMAN]                          | 1.04E-02 | 2.90E-02 | up   | 1.3567923  |
| P06746 | DNA polymerase beta OS=Homo sapiens GN=POLB PE=1 SV=3 - [DPOLB_HUMAN]                                      | 1.53E-03 | 8.06E-03 | down | -1.1838535 |
| P00533 | Epidermal growth factor receptor OS=Homo sapiens GN=EGFR PE=1 SV=2 - [EGFR_HUMAN]                          | 1.64E-04 | 2.44E-03 | down | -2.0065012 |
| P58107 | Epiplakin OS=Homo sapiens GN=EPPK1 PE=1 SV=2 - [EPIPL_HUMAN]                                               | 8.65E-05 | 1.93E-03 | down | -1.2566304 |
| P55884 | Eukaryotic translation initiation factor 3 subunit B OS=Homo sapiens GN=EIF3B PE=1 SV=3 - [EIF3B_HUMAN]    | 5.64E-04 | 4.64E-03 | down | -1.3158051 |

|        |                                                                                                             |          |          |      |            |
|--------|-------------------------------------------------------------------------------------------------------------|----------|----------|------|------------|
| P09417 | Dihydropteridine reductase OS=Homo sapiens GN=QDPR PE=1 SV=2 - [DHPR_HUMAN]                                 | 1.74E-04 | 2.50E-03 | up   | 1.6191547  |
| Q8WUA7 | TBC1 domain family member 22A OS=Homo sapiens GN=TBC1D22A PE=1 SV=2 - [TB22A_HUMAN]                         | 1.53E-02 | 3.81E-02 | up   | 1.2787445  |
| P17812 | CTP synthase 1 OS=Homo sapiens GN=CTPS1 PE=1 SV=2 - [PYRG1_HUMAN]                                           | 6.05E-04 | 4.84E-03 | down | -1.5289824 |
| Q8TBX8 | Phosphatidylinositol 5-phosphate 4-kinase type-2 gamma OS=Homo sapiens GN=PIP4K2C PE=1 SV=3 - [PI42C_HUMAN] | 1.13E-02 | 3.09E-02 | up   | 1.1981641  |
| P07954 | Fumarate hydratase, mitochondrial OS=Homo sapiens GN=FH PE=1 SV=3 - [FUMH_HUMAN]                            | 2.61E-03 | 1.17E-02 | up   | 1.586866   |
| Q9H788 | SH2 domain-containing protein 4A OS=Homo sapiens GN=SH2D4A PE=1 SV=1 - [SH24A_HUMAN]                        | 2.03E-02 | 4.67E-02 | up   | 1.3383296  |
| Q9P2E9 | Ribosome-binding protein 1 OS=Homo sapiens GN=RRBP1 PE=1 SV=4 - [RRBP1_HUMAN]                               | 9.20E-03 | 2.66E-02 | up   | 1.3453128  |
| Q9NPH2 | Inositol-3-phosphate synthase 1 OS=Homo sapiens GN=ISYNA1 PE=1 SV=1 - [INO1_HUMAN]                          | 3.67E-03 | 1.45E-02 | down | -1.439747  |
| Q00341 | Vigilin OS=Homo sapiens GN=HDLBP PE=1 SV=2 - [VIGLN_HUMAN]                                                  | 8.02E-05 | 1.93E-03 | down | -1.256816  |
| Q9NR45 | Sialic acid synthase OS=Homo sapiens GN=NANS PE=1 SV=2 - [SIAS_HUMAN]                                       | 1.60E-03 | 8.30E-03 | up   | 2.017355   |
| P51116 | Fragile X mental retardation syndrome-related protein 2 OS=Homo sapiens GN=FXR2 PE=1 SV=2 - [FXR2_HUMAN]    | 9.66E-03 | 2.76E-02 | down | -1.4320009 |
| P07686 | Beta-hexosaminidase subunit beta OS=Homo sapiens GN=HEXB PE=1 SV=3 - [HEXB_HUMAN]                           | 5.18E-06 | 1.13E-03 | up   | 2.9749308  |
| P61163 | Alpha-centractin OS=Homo sapiens GN=ACTR1A PE=1 SV=1 - [ACTZ_HUMAN]                                         | 7.69E-03 | 2.34E-02 | down | -1.3391565 |
| Q00403 | Transcription initiation factor IIB OS=Homo sapiens GN=GTF2B PE=1 SV=1 - [TF2B_HUMAN]                       | 9.04E-05 | 1.93E-03 | down | -1.6268498 |
| Q6IBS0 | Twintilin-2 OS=Homo sapiens GN=TW2F2 PE=1 SV=2 - [TW2F2_HUMAN]                                              | 1.29E-03 | 7.28E-03 | down | -1.3557509 |
| O60437 | Periplakin OS=Homo sapiens GN=PPL PE=1 SV=4 - [PEPL_HUMAN]                                                  | 1.86E-03 | 9.03E-03 | up   | 1.3550858  |
| P45974 | Ubiquitin carboxyl-terminal hydrolase 5 OS=Homo sapiens GN=USP5 PE=1 SV=2 - [UBP5_HUMAN]                    | 6.92E-03 | 2.20E-02 | up   | 1.3926362  |
| O75746 | Calcium-binding mitochondrial carrier protein Aralar1 OS=Homo sapiens GN=SLC25A12 PE=1 SV=2 - [CMC1_HUMAN]  | 5.58E-03 | 1.93E-02 | up   | 1.1514953  |
| Q9H488 | GDP-fucose protein O-fucosyltransferase 1 OS=Homo sapiens GN=POFUT1 PE=1 SV=1 - [OFUT1_HUMAN]               | 9.77E-04 | 6.18E-03 | down | -1.2536441 |
| Q9GZL7 | Ribosome biogenesis protein WDR12 OS=Homo sapiens GN=WDR12 PE=1 SV=2 - [WDR12_HUMAN]                        | 8.79E-03 | 2.59E-02 | down | -1.407055  |
| Q96GA7 | Serine dehydratase-like OS=Homo sapiens GN=SDSL PE=1 SV=1 - [SDSL_HUMAN]                                    | 2.61E-04 | 3.11E-03 | up   | 1.6641517  |
| Q8N1G4 | Leucine-rich repeat-containing protein 47 OS=Homo sapiens GN=LRRC47 PE=1 SV=1 - [LRC47_HUMAN]               | 5.98E-03 | 2.01E-02 | down | -1.2038138 |
| Q9UBU8 | Mortality factor 4-like protein 1 OS=Homo sapiens GN=MORF4L1 PE=1 SV=2 - [MO4L1_HUMAN]                      | 1.44E-02 | 3.66E-02 | down | -1.2230835 |
| Q9Y5Z4 | Heme-binding protein 2 OS=Homo sapiens GN=HEBP2 PE=1 SV=1 - [HEBP2_HUMAN]                                   | 3.13E-04 | 3.39E-03 | up   | 1.6592985  |
| Q9BQG0 | Myb-binding protein 1A OS=Homo sapiens GN=MYBBP1A PE=1 SV=2 - [MBB1A_HUMAN]                                 | 1.48E-03 | 7.93E-03 | down | -1.2400677 |
| P63279 | SUMO-conjugating enzyme UBC9 OS=Homo sapiens GN=UBE2I PE=1 SV=1 - [UBC9_HUMAN]                              | 3.04E-04 | 3.37E-03 | up   | 1.4283125  |
| O00154 | Cytosolic acyl coenzyme A thioester hydrolase OS=Homo sapiens GN=ACOT7 PE=1 SV=3 - [BACH_HUMAN]             | 3.49E-03 | 1.41E-02 | down | -1.4204521 |
| Q9Y2Z0 | Protein SGT1 homolog OS=Homo sapiens GN=SUGT1 PE=1 SV=3 - [SGT1_HUMAN]                                      | 4.44E-03 | 1.65E-02 | down | -1.4518747 |
| Q969L2 | Protein MAL2 OS=Homo sapiens GN=MAL2 PE=1 SV=1 - [MAL2_HUMAN]                                               | 3.08E-03 | 1.30E-02 | up   | 1.3011281  |
| Q14232 | Translation initiation factor eIF-2B subunit alpha OS=Homo sapiens GN=EIF2B1 PE=1 SV=1 - [EI2BA_HUMAN]      | 4.68E-03 | 1.68E-02 | down | -1.2916558 |
| Q9Y6N5 | Sulfide:quinone oxidoreductase, mitochondrial OS=Homo sapiens GN=SQRDL PE=1 SV=1 - [SQRD_HUMAN]             | 3.78E-03 | 1.48E-02 | up   | 1.2973895  |
| Q96T76 | MMS19 nucleotide excision repair protein homolog OS=Homo sapiens GN=MMS19 PE=1 SV=2 - [MMS19_HUMAN]         | 5.72E-03 | 1.96E-02 | down | -1.409594  |
| P25205 | DNA replication licensing factor MCM3 OS=Homo sapiens GN=MCM3 PE=1 SV=3 - [MCM3_HUMAN]                      | 2.47E-03 | 1.13E-02 | down | -1.3640145 |
| P36543 | V-type proton ATPase subunit E 1 OS=Homo sapiens GN=ATP6V1E1 PE=1 SV=1 - [VATE1_HUMAN]                      | 1.72E-03 | 8.57E-03 | up   | 1.5892648  |

|        |                                                                                                        |          |          |      |            |
|--------|--------------------------------------------------------------------------------------------------------|----------|----------|------|------------|
| Q9P0V9 | Septin-10 OS=Homo sapiens GN=SEPT10 PE=1 SV=2 - [SEP10_HUMAN]                                          | 2.29E-04 | 2.87E-03 | down | -3.1691968 |
| P36776 | Lon protease homolog, mitochondrial OS=Homo sapiens GN=LONP1 PE=1 SV=2 - [LONM_HUMAN]                  | 3.47E-04 | 3.55E-03 | up   | 1.681468   |
| Q9H6F5 | Coiled-coil domain-containing protein 86 OS=Homo sapiens GN=CCDC86 PE=1 SV=1 - [CCD86_HUMAN]           | 1.12E-04 | 2.11E-03 | down | -1.461012  |
| P52815 | 39S ribosomal protein L12, mitochondrial OS=Homo sapiens GN=MRPL12 PE=1 SV=2 - [RM12_HUMAN]            | 2.06E-02 | 4.73E-02 | up   | 1.1835872  |
| Q9BSH4 | Translational activator of cytochrome c oxidase 1 OS=Homo sapiens GN=TACO1 PE=1 SV=1 - [TACO1_HUMAN]   | 4.45E-04 | 4.02E-03 | up   | 1.3613174  |
| Q9Y266 | Nuclear migration protein nudC OS=Homo sapiens GN=NUDC PE=1 SV=1 - [NUDC_HUMAN]                        | 3.32E-05 | 1.71E-03 | down | -1.9088488 |
| P10114 | Ras-related protein Rap-2a OS=Homo sapiens GN=RAP2A PE=1 SV=1 - [RAP2A_HUMAN]                          | 6.37E-04 | 4.98E-03 | up   | 1.537162   |
| Q9BZE4 | Nucleolar GTP-binding protein 1 OS=Homo sapiens GN=GTPBP4 PE=1 SV=3 - [NOG1_HUMAN]                     | 1.66E-03 | 8.45E-03 | down | -1.2020156 |
| P19623 | Spermidine synthase OS=Homo sapiens GN=SRM PE=1 SV=1 - [SPEE_HUMAN]                                    | 3.50E-06 | 8.76E-04 | down | -2.0793793 |
| Q9Y478 | 5'-AMP-activated protein kinase subunit beta-1 OS=Homo sapiens GN=PRKAB1 PE=1 SV=4 - [AAKB1_HUMAN]     | 4.13E-03 | 1.57E-02 | up   | 1.2668242  |
| Q53H12 | Acylglycerol kinase, mitochondrial OS=Homo sapiens GN=AGK PE=1 SV=2 - [AGK_HUMAN]                      | 8.42E-04 | 5.78E-03 | up   | 1.1963671  |
| O94979 | Protein transport protein Sec31A OS=Homo sapiens GN=SEC31A PE=1 SV=3 - [SC31A_HUMAN]                   | 1.90E-02 | 4.45E-02 | up   | 1.2902408  |
| Q8NF37 | Lysophosphatidylcholine acyltransferase 1 OS=Homo sapiens GN=LPCAT1 PE=1 SV=2 - [PCAT1_HUMAN]          | 4.63E-03 | 1.68E-02 | down | -1.2672658 |
| P00749 | Urokinase-type plasminogen activator OS=Homo sapiens GN=PLAU PE=1 SV=2 - [UROK_HUMAN]                  | 7.36E-03 | 2.27E-02 | up   | 1.5188869  |
| Q9BSD7 | Cancer-related nucleoside-triphosphatase OS=Homo sapiens GN=NTPCR PE=1 SV=1 - [NTPCR_HUMAN]            | 2.74E-04 | 3.20E-03 | up   | 2.0379148  |
| Q96GX9 | Methylthioribulose-1-phosphate dehydratase OS=Homo sapiens GN=APIP PE=1 SV=1 - [MTNB_HUMAN]            | 1.61E-03 | 8.31E-03 | up   | 1.1866856  |
| Q9NZ08 | Endoplasmic reticulum aminopeptidase 1 OS=Homo sapiens GN=ERAP1 PE=1 SV=3 - [ERAP1_HUMAN]              | 1.10E-03 | 6.69E-03 | up   | 1.6819026  |
| O60841 | Eukaryotic translation initiation factor 5B OS=Homo sapiens GN=EIF5B PE=1 SV=4 - [IF2P_HUMAN]          | 1.50E-02 | 3.77E-02 | down | -1.174676  |
| P50895 | Basal cell adhesion molecule OS=Homo sapiens GN=BCAM PE=1 SV=2 - [BCAM_HUMAN]                          | 1.95E-03 | 9.38E-03 | down | -1.5468674 |
| Q96RP9 | Elongation factor G, mitochondrial OS=Homo sapiens GN=GFM1 PE=1 SV=2 - [EFGM_HUMAN]                    | 6.30E-03 | 2.08E-02 | up   | 1.2896384  |
| P56537 | Eukaryotic translation initiation factor 6 OS=Homo sapiens GN=EIF6 PE=1 SV=1 - [IF6_HUMAN]             | 1.31E-04 | 2.30E-03 | down | -1.5281272 |
| Q9Y570 | Protein phosphatase methylesterase 1 OS=Homo sapiens GN=PPME1 PE=1 SV=3 - [PPME1_HUMAN]                | 6.32E-03 | 2.08E-02 | up   | 1.1573726  |
| Q9Y5X3 | Sorting nexin-5 OS=Homo sapiens GN=SNX5 PE=1 SV=1 - [SNX5_HUMAN]                                       | 4.21E-03 | 1.60E-02 | up   | 1.2299447  |
| P51812 | Ribosomal protein S6 kinase alpha-3 OS=Homo sapiens GN=RPS6KA3 PE=1 SV=1 - [KS6A3_HUMAN]               | 1.07E-02 | 2.96E-02 | up   | 1.1284436  |
| Q8NFJ5 | Retinoic acid-induced protein 3 OS=Homo sapiens GN=GPRC5A PE=1 SV=2 - [RAI3_HUMAN]                     | 6.05E-05 | 1.78E-03 | up   | 2.446458   |
| Q12788 | Transducin beta-like protein 3 OS=Homo sapiens GN=TBL3 PE=1 SV=2 - [TBL3_HUMAN]                        | 8.94E-03 | 2.62E-02 | down | -1.3035139 |
| Q14344 | Guanine nucleotide-binding protein subunit alpha-13 OS=Homo sapiens GN=GNA13 PE=1 SV=2 - [GNA13_HUMAN] | 1.24E-04 | 2.21E-03 | up   | 1.4162366  |
| Q92530 | Proteasome inhibitor PI31 subunit OS=Homo sapiens GN=PSMF1 PE=1 SV=2 - [PSMF1_HUMAN]                   | 2.28E-03 | 1.07E-02 | down | -1.3225527 |
| O43813 | LanC-like protein 1 OS=Homo sapiens GN=LANCL1 PE=1 SV=1 - [LANC1_HUMAN]                                | 2.18E-04 | 2.81E-03 | up   | 2.9125082  |
| P04040 | Catalase OS=Homo sapiens GN=CAT PE=1 SV=3 - [CATA_HUMAN]                                               | 2.54E-05 | 1.44E-03 | up   | 2.2587867  |
| Q99541 | Perilipin-2 OS=Homo sapiens GN=PLIN2 PE=1 SV=2 - [PLIN2_HUMAN]                                         | 2.80E-03 | 1.24E-02 | up   | 1.4395255  |
| Q16666 | Gamma-interferon-inducible protein 16 OS=Homo sapiens GN=IFI16 PE=1 SV=3 - [IF16_HUMAN]                | 1.26E-05 | 1.36E-03 | up   | 1.8990318  |
| P55265 | Double-stranded RNA-specific adenosine deaminase OS=Homo sapiens GN=ADAR PE=1 SV=4 - [DSRAD_HUMAN]     | 1.00E-04 | 2.01E-03 | up   | 1.4333954  |
| P61421 | V-type proton ATPase subunit d 1 OS=Homo sapiens GN=ATP6V0D1 PE=1 SV=1 - [VAOD1_HUMAN]                 | 4.58E-04 | 4.06E-03 | up   | 1.5366842  |

|        |                                                                                                          |          |          |      |            |
|--------|----------------------------------------------------------------------------------------------------------|----------|----------|------|------------|
| Q6UXH1 | Cysteine-rich with EGF-like domain protein 2 OS=Homo sapiens GN=CRELD2 PE=1 SV=1 - [CRELD2_HUMAN]        | 6.74E-04 | 5.11E-03 | up   | 2.1996548  |
| Q15021 | Condensin complex subunit 1 OS=Homo sapiens GN=NCAPD2 PE=1 SV=3 - [CND1_HUMAN]                           | 7.50E-04 | 5.41E-03 | down | -1.3730582 |
| Q9BWS9 | Chitinase domain-containing protein 1 OS=Homo sapiens GN=CHID1 PE=1 SV=1 - [CHID1_HUMAN]                 | 5.47E-04 | 4.58E-03 | up   | 1.3908793  |
| Q9NZT2 | Opioid growth factor receptor OS=Homo sapiens GN=OGFR PE=1 SV=3 - [OGFR_HUMAN]                           | 9.10E-03 | 2.65E-02 | up   | 1.1740304  |
| O60610 | Protein diaphanous homolog 1 OS=Homo sapiens GN=DIAPH1 PE=1 SV=2 - [DIAP1_HUMAN]                         | 1.96E-02 | 4.56E-02 | down | -1.1406935 |
| O14684 | Prostaglandin E synthase OS=Homo sapiens GN=PTGES PE=1 SV=2 - [PTGES_HUMAN]                              | 3.80E-03 | 1.48E-02 | up   | 3.5154588  |
| P27701 | CD82 antigen OS=Homo sapiens GN=CD82 PE=1 SV=1 - [CD82_HUMAN]                                            | 1.61E-03 | 8.31E-03 | up   | 1.598229   |
| O76027 | Annexin A9 OS=Homo sapiens GN=ANXA9 PE=1 SV=3 - [ANXA9_HUMAN]                                            | 7.57E-05 | 1.91E-03 | up   | 2.784713   |
| Q92879 | CUGBP Elav-like family member 1 OS=Homo sapiens GN=CELF1 PE=1 SV=2 - [CELF1_HUMAN]                       | 9.71E-04 | 6.16E-03 | down | -1.2149919 |
| P06865 | Beta-hexosaminidase subunit alpha OS=Homo sapiens GN=HEXA PE=1 SV=2 - [HEXA_HUMAN]                       | 1.99E-05 | 1.36E-03 | up   | 2.9524713  |
| Q14134 | Tripartite motif-containing protein 29 OS=Homo sapiens GN=TRIM29 PE=1 SV=2 - [TRI29_HUMAN]               | 1.13E-02 | 3.10E-02 | down | -1.1202435 |
| Q9UBB4 | Ataxin-10 OS=Homo sapiens GN=ATXN10 PE=1 SV=1 - [ATX10_HUMAN]                                            | 1.86E-03 | 9.03E-03 | up   | 1.5241088  |
| Q9BQ39 | ATP-dependent RNA helicase DDX50 OS=Homo sapiens GN=DDX50 PE=1 SV=1 - [DDX50_HUMAN]                      | 6.10E-03 | 2.03E-02 | down | -1.8190496 |
| O60749 | Sorting nexin-2 OS=Homo sapiens GN=SNX2 PE=1 SV=2 - [SNX2_HUMAN]                                         | 3.62E-04 | 3.61E-03 | up   | 1.3565215  |
| Q9BW04 | Specifically androgen-regulated gene protein OS=Homo sapiens GN=SARG PE=1 SV=2 - [SARG_HUMAN]            | 2.92E-03 | 1.27E-02 | down | -1.5747366 |
| P00390 | Glutathione reductase, mitochondrial OS=Homo sapiens GN=GSR PE=1 SV=2 - [GSHR_HUMAN]                     | 6.31E-05 | 1.78E-03 | up   | 2.4924774  |
| P45983 | Mitogen-activated protein kinase 8 OS=Homo sapiens GN=MAPK8 PE=1 SV=2 - [MK08_HUMAN]                     | 2.55E-04 | 3.08E-03 | down | -2.2800934 |
| Q99848 | Probable rRNA-processing protein EBP2 OS=Homo sapiens GN=EBNA1BP2 PE=1 SV=2 - [EBP2_HUMAN]               | 7.70E-04 | 5.51E-03 | down | -1.6622479 |
| P51659 | Peroxisomal multifunctional enzyme type 2 OS=Homo sapiens GN=HSD17B4 PE=1 SV=3 - [DHB4_HUMAN]            | 5.55E-05 | 1.78E-03 | up   | 1.5258179  |
| Q14978 | Nucleolar and coiled-body phosphoprotein 1 OS=Homo sapiens GN=NOLC1 PE=1 SV=2 - [NOLC1_HUMAN]            | 8.47E-05 | 1.93E-03 | down | -1.6888846 |
| Q9UHY1 | Nuclear receptor-binding protein OS=Homo sapiens GN=NRBP1 PE=1 SV=1 - [NRBP_HUMAN]                       | 9.43E-03 | 2.71E-02 | up   | 1.3206558  |
| P15104 | Glutamine synthetase OS=Homo sapiens GN=GLUL PE=1 SV=4 - [GLNA_HUMAN]                                    | 4.48E-03 | 1.65E-02 | up   | 1.3073772  |
| Q8IU00 | Trafficking protein particle complex subunit 5 OS=Homo sapiens GN=TRAPPC5 PE=1 SV=1 - [TPPCS_HUMAN]      | 6.42E-03 | 2.09E-02 | up   | 1.3734064  |
| P13798 | Acylamino-acid-releasing enzyme OS=Homo sapiens GN=APEH PE=1 SV=4 - [ACPH_HUMAN]                         | 1.64E-02 | 4.02E-02 | down | -1.1407412 |
| Q9UI12 | V-type proton ATPase subunit H OS=Homo sapiens GN=ATP6V1H PE=1 SV=1 - [VATH_HUMAN]                       | 1.57E-03 | 8.21E-03 | up   | 1.4507337  |
| P51648 | Fatty aldehyde dehydrogenase OS=Homo sapiens GN=ALDH3A2 PE=1 SV=1 - [AL3A2_HUMAN]                        | 1.94E-04 | 2.70E-03 | down | -1.3439752 |
| P50402 | Emerin OS=Homo sapiens GN=EMD PE=1 SV=1 - [EMD_HUMAN]                                                    | 7.09E-03 | 2.22E-02 | down | -1.5698254 |
| P49189 | 4-trimethylaminobutyraldehyde dehydrogenase OS=Homo sapiens GN=ALDH9A1 PE=1 SV=3 - [AL9A1_HUMAN]         | 1.59E-05 | 1.36E-03 | up   | 1.4587952  |
| Q9Y3A4 | Ribosomal RNA-processing protein 7 homolog A OS=Homo sapiens GN=RRP7A PE=1 SV=2 - [RRP7A_HUMAN]          | 9.10E-03 | 2.65E-02 | down | -1.2266407 |
| P52306 | Rap1 GTPase-GDP dissociation stimulator 1 OS=Homo sapiens GN=RAP1GDS1 PE=1 SV=3 - [GDS1_HUMAN]           | 1.56E-02 | 3.85E-02 | down | -1.121545  |
| Q08AF3 | Schlafen family member 5 OS=Homo sapiens GN=SLFN5 PE=1 SV=1 - [SLFN5_HUMAN]                              | 7.92E-04 | 5.60E-03 | up   | 1.9826893  |
| O75643 | U5 small nuclear ribonucleoprotein 200 kDa helicase OS=Homo sapiens GN=SNRNP200 PE=1 SV=2 - [U520_HUMAN] | 9.52E-03 | 2.73E-02 | down | -1.1944007 |
| Q9H4A5 | Golgi phosphoprotein 3-like OS=Homo sapiens GN=GOLPH3L PE=1 SV=1 - [GLP3L_HUMAN]                         | 7.45E-03 | 2.27E-02 | up   | 1.9586179  |
| Q9BPX3 | Condensin complex subunit 3 OS=Homo sapiens GN=NCAPG PE=1 SV=1 - [CND3_HUMAN]                            | 9.49E-04 | 6.11E-03 | down | -1.3318311 |

|        |                                                                                                                                                            |          |          |      |            |
|--------|------------------------------------------------------------------------------------------------------------------------------------------------------------|----------|----------|------|------------|
| Q7L1Q6 | Basic leucine zipper and W2 domain-containing protein 1 OS=Homo sapiens GN=BZW1 PE=1 SV=1 - [BZW1_HUMAN]                                                   | 1.14E-03 | 6.82E-03 | down | -1.6815206 |
| Q9Y276 | Mitochondrial chaperone BCS1 OS=Homo sapiens GN=BCS1L PE=1 SV=1 - [BCS1_HUMAN]                                                                             | 1.65E-03 | 8.39E-03 | down | -1.7372831 |
| P51159 | Ras-related protein Rab-27A OS=Homo sapiens GN=RAB27A PE=1 SV=3 - [RB27A_HUMAN]                                                                            | 5.87E-03 | 1.98E-02 | up   | 1.4642688  |
| P49642 | DNA primase small subunit OS=Homo sapiens GN=PRIM1 PE=1 SV=1 - [PRI1_HUMAN]                                                                                | 8.14E-04 | 5.71E-03 | down | -1.7366599 |
| P48449 | Lanosterol synthase OS=Homo sapiens GN=LSS PE=1 SV=1 - [ERG7_HUMAN]                                                                                        | 1.62E-03 | 8.34E-03 | up   | 1.4240606  |
| Q8NFH3 | Nucleoporin Nup43 OS=Homo sapiens GN=NUP43 PE=1 SV=1 - [NUP43_HUMAN]                                                                                       | 8.42E-03 | 2.51E-02 | down | -1.2197393 |
| Q15533 | Tapasin OS=Homo sapiens GN=TAPBP PE=1 SV=1 - [TPSN_HUMAN]                                                                                                  | 8.24E-04 | 5.71E-03 | up   | 2.064553   |
| Q6NUK1 | Calcium-binding mitochondrial carrier protein ScaMC-1 OS=Homo sapiens GN=SLC25A24 PE=1 SV=2 - [SCMC1_HUMAN]                                                | 9.74E-05 | 2.01E-03 | down | -1.4782157 |
| Q86U38 | Nucleolar protein 9 OS=Homo sapiens GN=NOP9 PE=1 SV=1 - [NOP9_HUMAN]                                                                                       | 4.46E-03 | 1.65E-02 | up   | 1.517769   |
| P49959 | Double-strand break repair protein MRE11 OS=Homo sapiens GN=MRE11 PE=1 SV=3 - [MRE11_HUMAN]                                                                | 5.43E-03 | 1.88E-02 | up   | 1.2570578  |
| Q9UDY2 | Tight junction protein ZO-2 OS=Homo sapiens GN=TJP2 PE=1 SV=2 - [ZO2_HUMAN]                                                                                | 2.01E-04 | 2.73E-03 | up   | 1.7104182  |
| P11182 | Lipoamide acyltransferase component of branched-chain alpha-keto acid dehydrogenase complex, mitochondrial OS=Homo sapiens GN=DBT PE=1 SV=3 - [ODB2_HUMAN] | 1.92E-02 | 4.50E-02 | down | -1.4291689 |
| O95747 | Serine/threonine-protein kinase OSR1 OS=Homo sapiens GN=OXSR1 PE=1 SV=1 - [OXSR1_HUMAN]                                                                    | 1.02E-03 | 6.38E-03 | up   | 1.2839477  |
| P57768 | Sorting nexin-16 OS=Homo sapiens GN=SNX16 PE=1 SV=2 - [SNX16_HUMAN]                                                                                        | 1.95E-02 | 4.56E-02 | up   | 1.4950898  |
| P46459 | Vesicle-fusing ATPase OS=Homo sapiens GN=NSF PE=1 SV=3 - [NSF_HUMAN]                                                                                       | 7.70E-06 | 1.35E-03 | up   | 1.8119555  |
| Q14744 | Protein arginine N-methyltransferase 5 OS=Homo sapiens GN=PRMT5 PE=1 SV=4 - [ANM5_HUMAN]                                                                   | 1.65E-02 | 4.03E-02 | down | -1.2156925 |
| O60762 | Dolichol-phosphate mannosyltransferase subunit 1 OS=Homo sapiens GN=DPM1 PE=1 SV=1 - [DPM1_HUMAN]                                                          | 7.37E-03 | 2.27E-02 | up   | 1.2151911  |
| O95478 | Ribosome biogenesis protein NSA2 homolog OS=Homo sapiens GN=NSA2 PE=1 SV=1 - [NSA2_HUMAN]                                                                  | 8.41E-03 | 2.51E-02 | down | -1.2447759 |
| Q13308 | Inactive tyrosine-protein kinase 7 OS=Homo sapiens GN=PTK7 PE=1 SV=2 - [PTK7_HUMAN]                                                                        | 1.23E-03 | 7.10E-03 | down | -1.2785714 |
| P35580 | Myosin-10 OS=Homo sapiens GN=MYH10 PE=1 SV=3 - [MYH10_HUMAN]                                                                                               | 2.49E-04 | 3.05E-03 | down | -1.4624026 |
| Q99747 | Gamma-soluble NSF attachment protein OS=Homo sapiens GN=NAPG PE=1 SV=1 - [SNAG_HUMAN]                                                                      | 1.99E-06 | 8.34E-04 | up   | 1.301351   |
| P31937 | 3-hydroxyisobutyrate dehydrogenase, mitochondrial OS=Homo sapiens GN=HIBADH PE=1 SV=2 - [3HIDH_HUMAN]                                                      | 1.25E-03 | 7.12E-03 | up   | 1.3404347  |
| Q9Y285 | Phenylalanine--tRNA ligase alpha subunit OS=Homo sapiens GN=FARSA PE=1 SV=3 - [SYFA_HUMAN]                                                                 | 2.13E-02 | 4.85E-02 | down | -1.2721947 |
| P25685 | DnaJ homolog subfamily B member 1 OS=Homo sapiens GN=DNAJB1 PE=1 SV=4 - [DNJB1_HUMAN]                                                                      | 2.55E-05 | 1.44E-03 | up   | 1.2354383  |
| Q9NRJ5 | Poly(A) polymerase beta OS=Homo sapiens GN=PAPOLB PE=2 SV=1 - [PAPOB_HUMAN]                                                                                | 4.30E-05 | 1.78E-03 | down | -1.7611123 |
| Q9HCC0 | Methylcrotonoyl-CoA carboxylase beta chain, mitochondrial OS=Homo sapiens GN=MCCC2 PE=1 SV=1 - [MCCB_HUMAN]                                                | 1.55E-02 | 3.84E-02 | up   | 1.4034     |
| O60906 | Sphingomyelin phosphodiesterase 2 OS=Homo sapiens GN=SMPD2 PE=1 SV=2 - [NSMA_HUMAN]                                                                        | 2.00E-03 | 9.60E-03 | up   | 1.2967778  |
| O95834 | Echinoderm microtubule-associated protein-like 2 OS=Homo sapiens GN=EML2 PE=1 SV=1 - [EMAL2_HUMAN]                                                         | 1.24E-03 | 7.10E-03 | up   | 1.4021201  |
| Q14787 | Transportin-2 OS=Homo sapiens GN=TNPO2 PE=1 SV=3 - [TNPO2_HUMAN]                                                                                           | 1.04E-03 | 6.44E-03 | up   | 1.4744554  |
| P48735 | Isocitrate dehydrogenase [NADP], mitochondrial OS=Homo sapiens GN=IDH2 PE=1 SV=2 - [IDHP_HUMAN]                                                            | 2.26E-04 | 2.86E-03 | up   | 1.4327364  |
| Q9UIA9 | Exportin-7 OS=Homo sapiens GN=XPO7 PE=1 SV=3 - [XPO7_HUMAN]                                                                                                | 1.15E-03 | 6.83E-03 | up   | 1.2675384  |
| Q9NSE4 | Isoleucine--tRNA ligase, mitochondrial OS=Homo sapiens GN=IARS2 PE=1 SV=2 - [SYIM_HUMAN]                                                                   | 4.46E-03 | 1.65E-02 | up   | 1.7426889  |
| Q16186 | Proteasomal ubiquitin receptor ADRM1 OS=Homo sapiens GN=ADRM1 PE=1 SV=2 - [ADRM1_HUMAN]                                                                    | 2.97E-03 | 1.28E-02 | down | -1.2287655 |
| Q2TAY7 | WD40 repeat-containing protein SMU1 OS=Homo sapiens GN=SMU1 PE=1 SV=2 - [SMU1_HUMAN]                                                                       | 1.40E-02 | 3.58E-02 | down | -1.2146875 |

|        |                                                                                                                                                    |          |          |      |            |
|--------|----------------------------------------------------------------------------------------------------------------------------------------------------|----------|----------|------|------------|
| Q16831 | Uridine phosphorylase 1 OS=Homo sapiens GN=UPP1 PE=1 SV=1 - [UPP1_HUMAN]                                                                           | 1.17E-03 | 6.92E-03 | up   | 1.583172   |
| Q9Y6K5 | 2'-5'-oligoadenylate synthase 3 OS=Homo sapiens GN=OAS3 PE=1 SV=3 - [OAS3_HUMAN]                                                                   | 9.42E-05 | 1.99E-03 | up   | 1.3342782  |
| Q9Y6M1 | Insulin-like growth factor 2 mRNA-binding protein 2 OS=Homo sapiens GN=IGF2BP2 PE=1 SV=2 - [IF2B2_HUMAN]                                           | 9.42E-03 | 2.71E-02 | down | -3.6895058 |
| Q5C9Z4 | Nucleolar MIF4G domain-containing protein 1 OS=Homo sapiens GN=NOM1 PE=1 SV=1 - [NOM1_HUMAN]                                                       | 1.08E-03 | 6.59E-03 | up   | 1.6000432  |
| Q9H9A6 | Leucine-rich repeat-containing protein 40 OS=Homo sapiens GN=LRRC40 PE=1 SV=1 - [LRC40_HUMAN]                                                      | 0.00E+00 | 0.00E+00 | down | -16        |
| Q9UJ70 | N-acetyl-D-glucosamine kinase OS=Homo sapiens GN=NAGK PE=1 SV=4 - [NAGK_HUMAN]                                                                     | 3.27E-03 | 1.36E-02 | up   | 1.7269212  |
| Q9H6W3 | Ribosomal oxygenase 1 OS=Homo sapiens GN=RIOX1 PE=1 SV=2 - [RIOX1_HUMAN]                                                                           | 6.41E-03 | 2.09E-02 | down | -1.1208888 |
| Q86V21 | Acetoacetyl-CoA synthetase OS=Homo sapiens GN=AACS PE=1 SV=1 - [AACS_HUMAN]                                                                        | 1.64E-05 | 1.36E-03 | down | -2.0512118 |
| Q6PI48 | Aspartate--tRNA ligase, mitochondrial OS=Homo sapiens GN=DARS2 PE=1 SV=1 - [SYDM_HUMAN]                                                            | 9.37E-04 | 6.11E-03 | up   | 1.5726361  |
| Q9Y3Z3 | Deoxynucleoside triphosphate triphosphohydrolase SAMHD1 OS=Homo sapiens GN=SAMHD1 PE=1 SV=2 - [SAMH1_HUMAN]                                        | 3.71E-04 | 3.61E-03 | up   | 1.4277416  |
| O75400 | Pre-mRNA-processing factor 40 homolog A OS=Homo sapiens GN=PRPF40A PE=1 SV=2 - [PR40A_HUMAN]                                                       | 2.01E-02 | 4.65E-02 | down | -1.1814973 |
| O15127 | Secretory carrier-associated membrane protein 2 OS=Homo sapiens GN=SCAMP2 PE=1 SV=2 - [SCAM2_HUMAN]                                                | 3.00E-03 | 1.28E-02 | up   | 1.3049076  |
| Q9ULX3 | RNA-binding protein NOB1 OS=Homo sapiens GN=NOB1 PE=1 SV=1 - [NOB1_HUMAN]                                                                          | 2.22E-04 | 2.84E-03 | down | -1.5035427 |
| O14896 | Interferon regulatory factor 6 OS=Homo sapiens GN=IRF6 PE=1 SV=1 - [IRF6_HUMAN]                                                                    | 2.95E-03 | 1.28E-02 | up   | 1.4686584  |
| O60264 | SWI/SNF-related matrix-associated actin-dependent regulator of chromatin subfamily A member 5 OS=Homo sapiens GN=SMARCA5 PE=1 SV=1 - [SMCA5_HUMAN] | 1.43E-02 | 3.65E-02 | down | -1.2105724 |
| O94925 | Glutaminase kidney isoform, mitochondrial OS=Homo sapiens GN=GLS PE=1 SV=1 - [GLSK_HUMAN]                                                          | 4.17E-04 | 3.84E-03 | down | -1.2727522 |
| Q96S44 | TP53-regulating kinase OS=Homo sapiens GN=TP53RK PE=1 SV=2 - [PRPK_HUMAN]                                                                          | 3.50E-03 | 1.41E-02 | up   | 1.2900254  |
| P52566 | Rho GDP-dissociation inhibitor 2 OS=Homo sapiens GN=ARHGDI2 PE=1 SV=3 - [GDIR2_HUMAN]                                                              | 1.86E-05 | 1.36E-03 | up   | 2.3920696  |
| P22307 | Non-specific lipid-transfer protein OS=Homo sapiens GN=SCP2 PE=1 SV=2 - [NLTP_HUMAN]                                                               | 9.14E-03 | 2.65E-02 | down | -1.2692349 |
| Q9P2R7 | Succinate--CoA ligase [ADP-forming] subunit beta, mitochondrial OS=Homo sapiens GN=SUCLA2 PE=1 SV=3 - [SUCB1_HUMAN]                                | 9.00E-05 | 1.93E-03 | up   | 1.4459355  |
| Q93050 | V-type proton ATPase 116 kDa subunit a isoform 1 OS=Homo sapiens GN=ATP6V0A1 PE=1 SV=3 - [VPP1_HUMAN]                                              | 1.23E-04 | 2.21E-03 | up   | 1.9227544  |
| Q08722 | Leukocyte surface antigen CD47 OS=Homo sapiens GN=CD47 PE=1 SV=1 - [CD47_HUMAN]                                                                    | 2.18E-04 | 2.81E-03 | up   | 1.6584599  |
| Q9Y5A7 | NEDD8 ultimate buster 1 OS=Homo sapiens GN=NUB1 PE=1 SV=2 - [NUB1_HUMAN]                                                                           | 1.24E-02 | 3.29E-02 | up   | 1.7533697  |
| O43663 | Protein regulator of cytokinesis 1 OS=Homo sapiens GN=PRC1 PE=1 SV=2 - [PRC1_HUMAN]                                                                | 6.62E-04 | 5.11E-03 | down | -1.7139791 |
| Q13045 | Protein flightless-1 homolog OS=Homo sapiens GN=FLII PE=1 SV=2 - [FLII_HUMAN]                                                                      | 4.69E-03 | 1.68E-02 | down | -1.2113197 |
| Q9N666 | Lysophospholipid acyltransferase 7 OS=Homo sapiens GN=MBOAT7 PE=1 SV=2 - [MBOA7_HUMAN]                                                             | 1.21E-02 | 3.25E-02 | down | -1.274538  |
| Q15003 | Condensin complex subunit 2 OS=Homo sapiens GN=NCAPH PE=1 SV=3 - [CND2_HUMAN]                                                                      | 1.01E-02 | 2.85E-02 | down | -1.472106  |
| P46087 | Probable 28S rRNA (cytosine(4447)-C(5))-methyltransferase OS=Homo sapiens GN=NOP2 PE=1 SV=2 - [NOP2_HUMAN]                                         | 8.93E-03 | 2.62E-02 | down | -1.1640453 |
| Q9Y6M7 | Sodium bicarbonate cotransporter 3 OS=Homo sapiens GN=SLC4A7 PE=1 SV=2 - [S4A7_HUMAN]                                                              | 2.01E-02 | 4.65E-02 | down | -1.1880937 |
| Q9GZR7 | ATP-dependent RNA helicase DDX24 OS=Homo sapiens GN=DDX24 PE=1 SV=1 - [DDX24_HUMAN]                                                                | 2.95E-03 | 1.28E-02 | down | -1.3916662 |
| Q16775 | Hydroxyacylglutathione hydrolase, mitochondrial OS=Homo sapiens GN=HAGH PE=1 SV=2 - [GLO2_HUMAN]                                                   | 1.33E-03 | 7.37E-03 | up   | 1.845707   |
| P27694 | Replication protein A 70 kDa DNA-binding subunit OS=Homo sapiens GN=RPA1 PE=1 SV=2 - [RFA1_HUMAN]                                                  | 3.38E-03 | 1.39E-02 | down | -1.3268305 |
| Q15020 | Squamous cell carcinoma antigen recognized by T-cells 3 OS=Homo sapiens GN=SART3 PE=1 SV=1 - [SART3_HUMAN]                                         | 1.51E-03 | 8.02E-03 | up   | 1.1961639  |
| Q9UNQ2 | Probable dimethyladenosine transferase OS=Homo sapiens GN=DIMT1 PE=1 SV=1 - [DIM1_HUMAN]                                                           | 1.78E-02 | 4.25E-02 | down | -1.1958653 |

|        |                                                                                                                 |          |          |      |            |
|--------|-----------------------------------------------------------------------------------------------------------------|----------|----------|------|------------|
| Q9BSJ8 | Extended synaptotagmin-1 OS=Homo sapiens GN=ESYT1 PE=1 SV=1 - [ESYT1_HUMAN]                                     | 9.08E-03 | 2.65E-02 | down | -1.1641192 |
| Q96SQ9 | Cytochrome P450 2S1 OS=Homo sapiens GN=CYP2S1 PE=1 SV=2 - [CP2S1_HUMAN]                                         | 4.65E-03 | 1.68E-02 | down | -1.2561288 |
| Q14956 | Transmembrane glycoprotein NMB OS=Homo sapiens GN=GPNMB PE=1 SV=2 - [GPNMB_HUMAN]                               | 3.20E-03 | 1.34E-02 | up   | 3.8122861  |
| Q13416 | Origin recognition complex subunit 2 OS=Homo sapiens GN=ORC2 PE=1 SV=2 - [ORC2_HUMAN]                           | 1.15E-02 | 3.14E-02 | down | -1.5569828 |
| O95347 | Structural maintenance of chromosomes protein 2 OS=Homo sapiens GN=SMC2 PE=1 SV=2 - [SMC2_HUMAN]                | 9.79E-03 | 2.77E-02 | down | -1.2051346 |
| Q9BRR6 | ADP-dependent glucokinase OS=Homo sapiens GN=ADPGK PE=1 SV=1 - [ADPGK_HUMAN]                                    | 7.05E-03 | 2.22E-02 | up   | 1.2796909  |
| P16070 | CD44 antigen OS=Homo sapiens GN=CD44 PE=1 SV=3 - [CD44_HUMAN]                                                   | 7.18E-03 | 2.24E-02 | down | -1.4455993 |
| P54687 | Branched-chain-amino-acid aminotransferase, cytosolic OS=Homo sapiens GN=BCAT1 PE=1 SV=3 - [BCAT1_HUMAN]        | 1.80E-03 | 8.88E-03 | up   | 1.7024701  |
| P16278 | Beta-galactosidase OS=Homo sapiens GN=GLB1 PE=1 SV=2 - [BGAL_HUMAN]                                             | 1.68E-05 | 1.36E-03 | up   | 2.674876   |
| Q9UJU6 | Drebrin-like protein OS=Homo sapiens GN=DBNL PE=1 SV=1 - [DBNL_HUMAN]                                           | 6.18E-03 | 2.05E-02 | down | -1.4999853 |
| P27708 | CAD protein OS=Homo sapiens GN=CAD PE=1 SV=3 - [PYR1_HUMAN]                                                     | 5.77E-03 | 1.97E-02 | down | -1.4113257 |
| Q9H4I3 | TraB domain-containing protein OS=Homo sapiens GN=TRABD PE=1 SV=1 - [TRABD_HUMAN]                               | 1.04E-02 | 2.90E-02 | up   | 1.2781523  |
| O43865 | S-adenosylhomocysteine hydrolase-like protein 1 OS=Homo sapiens GN=AHCYL1 PE=1 SV=2 - [SAHH2_HUMAN]             | 6.29E-04 | 4.96E-03 | down | -1.2098899 |
| Q02880 | DNA topoisomerase 2-beta OS=Homo sapiens GN=TOP2B PE=1 SV=3 - [TOP2B_HUMAN]                                     | 1.22E-02 | 3.26E-02 | up   | 1.2403648  |
| Q13033 | Striatin-3 OS=Homo sapiens GN=STRN3 PE=1 SV=3 - [STRN3_HUMAN]                                                   | 9.75E-03 | 2.77E-02 | down | -1.2795827 |
| Q8NBM4 | Ubiquitin-associated domain-containing protein 2 OS=Homo sapiens GN=UBAC2 PE=1 SV=1 - [UBAC2_HUMAN]             | 1.22E-02 | 3.26E-02 | up   | 1.1888158  |
| P0DMP2 | SLIT-ROBO Rho GTPase-activating protein 2B OS=Homo sapiens GN=SRGAP2B PE=3 SV=1 - [SRG2B_HUMAN]                 | 9.83E-03 | 2.78E-02 | up   | 1.8545426  |
| Q14534 | Squalene monooxygenase OS=Homo sapiens GN=SQLE PE=1 SV=3 - [ERG1_HUMAN]                                         | 5.62E-04 | 4.64E-03 | up   | 1.6891527  |
| Q5H9R7 | Serine/threonine-protein phosphatase 6 regulatory subunit 3 OS=Homo sapiens GN=PPP6R3 PE=1 SV=2 - [PP6R3_HUMAN] | 3.03E-05 | 1.63E-03 | down | -1.119556  |
| Q8NI36 | WD repeat-containing protein 36 OS=Homo sapiens GN=WDR36 PE=1 SV=1 - [WDR36_HUMAN]                              | 8.51E-03 | 2.53E-02 | down | -1.5635501 |
| Q5K651 | Sterile alpha motif domain-containing protein 9 OS=Homo sapiens GN=SAMD9 PE=1 SV=1 - [SAMD9_HUMAN]              | 1.84E-02 | 4.35E-02 | down | -1.5779779 |
| P78347 | General transcription factor II-I OS=Homo sapiens GN=GTF2I PE=1 SV=2 - [GTF2I_HUMAN]                            | 1.34E-03 | 7.37E-03 | down | -1.1755334 |
| Q13823 | Nucleolar GTP-binding protein 2 OS=Homo sapiens GN=GNL2 PE=1 SV=1 - [NOG2_HUMAN]                                | 6.56E-04 | 5.10E-03 | down | -1.3253435 |
| Q9UHL4 | Dipeptidyl peptidase 2 OS=Homo sapiens GN=DPP7 PE=1 SV=3 - [DPP2_HUMAN]                                         | 5.16E-04 | 4.41E-03 | up   | 1.5832589  |
| Q13188 | Serine/threonine-protein kinase 3 OS=Homo sapiens GN=STK3 PE=1 SV=2 - [STK3_HUMAN]                              | 4.66E-03 | 1.68E-02 | up   | 1.9148835  |
| Q9Y2T3 | Guanine deaminase OS=Homo sapiens GN=GDA PE=1 SV=1 - [GUAD_HUMAN]                                               | 2.31E-03 | 1.07E-02 | up   | 2.248735   |
| P53985 | Monocarboxylate transporter 1 OS=Homo sapiens GN=SLC16A1 PE=1 SV=3 - [MOT1_HUMAN]                               | 1.49E-02 | 3.76E-02 | down | -1.4588302 |
| O95400 | CD2 antigen cytoplasmic tail-binding protein 2 OS=Homo sapiens GN=CD2BP2 PE=1 SV=1 - [CD2B2_HUMAN]              | 4.61E-03 | 1.67E-02 | down | -1.4955467 |
| Q02040 | A-kinase anchor protein 17A OS=Homo sapiens GN=AKAP17A PE=1 SV=2 - [AK17A_HUMAN]                                | 5.98E-04 | 4.82E-03 | up   | 1.7645462  |
| Q96JB2 | Conserved oligomeric Golgi complex subunit 3 OS=Homo sapiens GN=COG3 PE=1 SV=3 - [COG3_HUMAN]                   | 1.46E-03 | 7.84E-03 | up   | 1.3927218  |
| O94832 | Unconventional myosin-IId OS=Homo sapiens GN=MYO1D PE=1 SV=2 - [MYO1D_HUMAN]                                    | 8.98E-03 | 2.63E-02 | up   | 1.6863748  |
| Q15643 | Thyroid receptor-interacting protein 11 OS=Homo sapiens GN=TRIP11 PE=1 SV=3 - [TRIPB_HUMAN]                     | 6.09E-03 | 2.03E-02 | down | -1.2959384 |
| Q92609 | TBC1 domain family member 5 OS=Homo sapiens GN=TBC1D5 PE=1 SV=1 - [TBCD5_HUMAN]                                 | 1.02E-04 | 2.02E-03 | up   | 1.5077848  |
| Q8N442 | Translation factor GUF1, mitochondrial OS=Homo sapiens GN=GUF1 PE=1 SV=1 - [GUF1_HUMAN]                         | 1.34E-03 | 7.37E-03 | up   | 1.5227385  |

|        |                                                                                                                             |          |          |      |            |
|--------|-----------------------------------------------------------------------------------------------------------------------------|----------|----------|------|------------|
| P12955 | Xaa-Pro dipeptidase OS=Homo sapiens GN=PEPD PE=1 SV=3 - [PEPD_HUMAN]                                                        | 1.19E-02 | 3.21E-02 | up   | 1.461973   |
| P80303 | Nucleobindin-2 OS=Homo sapiens GN=NUCB2 PE=1 SV=2 - [NUCB2_HUMAN]                                                           | 1.87E-03 | 9.03E-03 | up   | 1.867417   |
| Q9NTJ3 | Structural maintenance of chromosomes protein 4 OS=Homo sapiens GN=SMC4 PE=1 SV=2 - [SMC4_HUMAN]                            | 9.91E-04 | 6.22E-03 | down | -1.351252  |
| Q92538 | Golgi-specific brefeldin A-resistance guanine nucleotide exchange factor 1 OS=Homo sapiens GN=GBF1 PE=1 SV=2 - [GBF1_HUMAN] | 1.72E-03 | 8.57E-03 | down | -1.4695753 |
| Q5T160 | Probable arginine--tRNA ligase, mitochondrial OS=Homo sapiens GN=RARS2 PE=1 SV=1 - [SYRM_HUMAN]                             | 6.44E-03 | 2.09E-02 | up   | 1.3845218  |
| O75815 | Breast cancer anti-estrogen resistance protein 3 OS=Homo sapiens GN=BCAR3 PE=1 SV=1 - [BCAR3_HUMAN]                         | 2.90E-03 | 1.27E-02 | down | -1.8781439 |
| Q96AY3 | Peptidyl-prolyl cis-trans isomerase FKBP10 OS=Homo sapiens GN=FKBP10 PE=1 SV=1 - [FKB10_HUMAN]                              | 4.07E-04 | 3.77E-03 | down | -1.9798253 |
| O15131 | Importin subunit alpha-6 OS=Homo sapiens GN=KPNA5 PE=1 SV=2 - [IMA6_HUMAN]                                                  | 1.24E-03 | 7.10E-03 | down | -1.4166344 |
| Q7Z406 | Myosin-14 OS=Homo sapiens GN=MYH14 PE=1 SV=2 - [MYH14_HUMAN]                                                                | 8.23E-04 | 5.71E-03 | up   | 1.4848014  |
| Q01650 | Large neutral amino acids transporter small subunit 1 OS=Homo sapiens GN=SLC7A5 PE=1 SV=2 - [LAT1_HUMAN]                    | 2.12E-02 | 4.84E-02 | down | -1.2028178 |
| P11388 | DNA topoisomerase 2-alpha OS=Homo sapiens GN=TOP2A PE=1 SV=3 - [TOP2A_HUMAN]                                                | 3.62E-03 | 1.44E-02 | down | -1.4372797 |
| P18583 | Protein SON OS=Homo sapiens GN=SON PE=1 SV=4 - [SON_HUMAN]                                                                  | 3.83E-03 | 1.49E-02 | down | -1.358802  |
| Q02241 | Kinesin-like protein KIF23 OS=Homo sapiens GN=KIF23 PE=1 SV=3 - [KIF23_HUMAN]                                               | 1.83E-02 | 4.34E-02 | down | -1.435417  |
| P51649 | Succinate-semialdehyde dehydrogenase, mitochondrial OS=Homo sapiens GN=ALDH5A1 PE=1 SV=2 - [SSDH_HUMAN]                     | 6.95E-04 | 5.21E-03 | up   | 2.3108363  |
| O75153 | Clustered mitochondria protein homolog OS=Homo sapiens GN=CLUH PE=1 SV=2 - [CLU_HUMAN]                                      | 2.65E-03 | 1.19E-02 | down | -1.6971428 |
| Q63HN8 | E3 ubiquitin-protein ligase RNF213 OS=Homo sapiens GN=RNF213 PE=1 SV=3 - [RN213_HUMAN]                                      | 3.18E-04 | 3.42E-03 | up   | 2.2583714  |
| Q12768 | WASH complex subunit 5 OS=Homo sapiens GN=WASHC5 PE=1 SV=1 - [WASC5_HUMAN]                                                  | 4.64E-03 | 1.68E-02 | up   | 1.2072117  |
| Q9H6T3 | RNA polymerase II-associated protein 3 OS=Homo sapiens GN=RPAP3 PE=1 SV=2 - [RPAP3_HUMAN]                                   | 1.73E-02 | 4.14E-02 | down | -1.3079689 |
| Q9H9E3 | Conserved oligomeric Golgi complex subunit 4 OS=Homo sapiens GN=COG4 PE=1 SV=3 - [COG4_HUMAN]                               | 2.23E-03 | 1.05E-02 | up   | 1.1368095  |
| O60341 | Lysine-specific histone demethylase 1A OS=Homo sapiens GN=KDM1A PE=1 SV=2 - [KDM1A_HUMAN]                                   | 5.99E-04 | 4.82E-03 | up   | 1.5121465  |
| A0MZ66 | Shootin-1 OS=Homo sapiens GN=SHTN1 PE=1 SV=4 - [SHOT1_HUMAN]                                                                | 2.05E-03 | 9.81E-03 | down | -1.4179077 |
| O14617 | AP-3 complex subunit delta-1 OS=Homo sapiens GN=AP3D1 PE=1 SV=1 - [AP3D1_HUMAN]                                             | 1.82E-02 | 4.32E-02 | up   | 1.3282548  |
| Q6IA69 | Glutamine-dependent NAD(+) synthetase OS=Homo sapiens GN=NADSYN1 PE=1 SV=3 - [NADE_HUMAN]                                   | 8.40E-03 | 2.51E-02 | up   | 1.7894685  |
| Q15436 | Protein transport protein Sec23A OS=Homo sapiens GN=SEC23A PE=1 SV=2 - [SC23A_HUMAN]                                        | 3.21E-03 | 1.34E-02 | down | -1.1793545 |
| O14964 | Hepatocyte growth factor-regulated tyrosine kinase substrate OS=Homo sapiens GN=HGS PE=1 SV=1 - [HGS_HUMAN]                 | 2.16E-02 | 4.92E-02 | up   | 1.2667841  |
| P26006 | Integrin alpha-3 OS=Homo sapiens GN=ITGA3 PE=1 SV=5 - [ITA3_HUMAN]                                                          | 7.39E-03 | 2.27E-02 | down | -1.2150097 |
| Q8IZL8 | Proline-, glutamic acid- and leucine-rich protein 1 OS=Homo sapiens GN=PELP1 PE=1 SV=2 - [PELP1_HUMAN]                      | 2.70E-03 | 1.20E-02 | up   | 1.2021981  |
| Q13409 | Cytoplasmic dynein 1 intermediate chain 2 OS=Homo sapiens GN=DYNC1I2 PE=1 SV=3 - [DC1I2_HUMAN]                              | 2.48E-03 | 1.13E-02 | up   | 1.6033486  |
| Q9Y5K6 | CD2-associated protein OS=Homo sapiens GN=CD2AP PE=1 SV=1 - [CD2AP_HUMAN]                                                   | 1.33E-03 | 7.37E-03 | up   | 1.1512592  |
| Q92922 | SWI/SNF complex subunit SMARCC1 OS=Homo sapiens GN=SMARCC1 PE=1 SV=3 - [SMRC1_HUMAN]                                        | 4.36E-03 | 1.63E-02 | down | -1.512285  |
| P26358 | DNA (cytosine-5)-methyltransferase 1 OS=Homo sapiens GN=DNMT1 PE=1 SV=2 - [DNMT1_HUMAN]                                     | 2.08E-04 | 2.79E-03 | down | -1.7789246 |
| P06396 | Gelsolin OS=Homo sapiens GN=GSN PE=1 SV=1 - [GELS_HUMAN]                                                                    | 1.79E-02 | 4.27E-02 | up   | 1.2887648  |
| Q32P28 | Prolyl 3-hydroxylase 1 OS=Homo sapiens GN=P3H1 PE=1 SV=2 - [P3H1_HUMAN]                                                     | 2.98E-03 | 1.28E-02 | down | -2.4484682 |
| Q5UIP0 | Telomere-associated protein RIF1 OS=Homo sapiens GN=RIF1 PE=1 SV=2 - [RIF1_HUMAN]                                           | 8.06E-05 | 1.93E-03 | down | -2.498625  |



|        |                                                                                                                 |          |          |      |            |
|--------|-----------------------------------------------------------------------------------------------------------------|----------|----------|------|------------|
| Q9NW13 | RNA-binding protein 28 OS=Homo sapiens GN=RBM28 PE=1 SV=3 - [RBM28_HUMAN]                                       | 2.03E-04 | 2.73E-03 | down | -1.2218133 |
| Q03519 | Antigen peptide transporter 2 OS=Homo sapiens GN=TAP2 PE=1 SV=1 - [TAP2_HUMAN]                                  | 5.73E-04 | 4.65E-03 | up   | 2.892575   |
| Q93034 | Cullin-5 OS=Homo sapiens GN=CUL5 PE=1 SV=4 - [CUL5_HUMAN]                                                       | 1.02E-02 | 2.87E-02 | up   | 1.3159928  |
| Q5T0N5 | Formin-binding protein 1-like OS=Homo sapiens GN=FNBP1L PE=1 SV=3 - [FBP1L_HUMAN]                               | 2.36E-04 | 2.93E-03 | down | -1.4343518 |
| Q9NV11 | Fanconi anemia group I protein OS=Homo sapiens GN=FANCI PE=1 SV=4 - [FANCI_HUMAN]                               | 1.67E-02 | 4.04E-02 | down | -1.2644907 |
| Q8IYB3 | Serine/arginine repetitive matrix protein 1 OS=Homo sapiens GN=SRRM1 PE=1 SV=2 - [SRRM1_HUMAN]                  | 3.91E-03 | 1.51E-02 | down | -1.440327  |
| O95202 | LETM1 and EF-hand domain-containing protein 1, mitochondrial OS=Homo sapiens GN=LETM1 PE=1 SV=1 - [LETM1_HUMAN] | 1.46E-02 | 3.68E-02 | up   | 1.1514128  |
| O95104 | Splicing factor, arginine/serine-rich 15 OS=Homo sapiens GN=SCAF4 PE=1 SV=3 - [SFR15_HUMAN]                     | 1.23E-02 | 3.27E-02 | up   | 1.2844826  |
| Q9Y4W6 | AFG3-like protein 2 OS=Homo sapiens GN=AFG3L2 PE=1 SV=2 - [AFG32_HUMAN]                                         | 6.36E-03 | 2.08E-02 | up   | 1.4096694  |
| P78344 | Eukaryotic translation initiation factor 4 gamma 2 OS=Homo sapiens GN=EIF4G2 PE=1 SV=1 - [IF4G2_HUMAN]          | 1.41E-03 | 7.65E-03 | down | -1.3584572 |
| Q14690 | Protein RRP5 homolog OS=Homo sapiens GN=PDCD11 PE=1 SV=3 - [RRP5_HUMAN]                                         | 1.16E-03 | 6.86E-03 | down | -1.2546092 |
| Q08378 | Golgin subfamily A member 3 OS=Homo sapiens GN=GOLGA3 PE=1 SV=2 - [GOGA3_HUMAN]                                 | 1.18E-03 | 6.92E-03 | down | -1.2846271 |
| Q9Y6D6 | Brefeldin A-inhibited guanine nucleotide-exchange protein 1 OS=Homo sapiens GN=ARFGEF1 PE=1 SV=2 - [BIG1_HUMAN] | 1.22E-02 | 3.26E-02 | up   | 1.5689297  |
| Q9Y3R5 | Protein dopey-2 OS=Homo sapiens GN=DOPEY2 PE=1 SV=5 - [DOP2_HUMAN]                                              | 7.37E-03 | 2.27E-02 | up   | 1.7305596  |
| Q9UDT6 | CAP-Gly domain-containing linker protein 2 OS=Homo sapiens GN=CLIP2 PE=1 SV=1 - [CLIP2_HUMAN]                   | 1.03E-02 | 2.88E-02 | down | -1.2741673 |
| P09884 | DNA polymerase alpha catalytic subunit OS=Homo sapiens GN=POLA1 PE=1 SV=2 - [DPOLA_HUMAN]                       | 7.88E-03 | 2.39E-02 | down | -2.207869  |
| Q9Y4B6 | DDB1- and CUL4-associated factor 1 OS=Homo sapiens GN=DCAF1 PE=1 SV=3 - [DCAF1_HUMAN]                           | 6.24E-03 | 2.06E-02 | up   | 1.6140684  |
| Q14689 | Disco-interacting protein 2 homolog A OS=Homo sapiens GN=DIP2A PE=1 SV=2 - [DIP2A_HUMAN]                        | 1.79E-03 | 8.88E-03 | down | -1.2471621 |
| Q9Y5S2 | Serine/threonine-protein kinase MRCK beta OS=Homo sapiens GN=CDC42BPB PE=1 SV=2 - [MRCKB_HUMAN]                 | 3.70E-03 | 1.46E-02 | up   | 1.5261877  |
| Q9ULL4 | Plexin-B3 OS=Homo sapiens GN=PLXNB3 PE=1 SV=2 - [PLXB3_HUMAN]                                                   | 1.60E-02 | 3.92E-02 | up   | 1.1816063  |
